# Supplementary material for: Immunohistochemical Characterization of the Nervous System of Culex pipiens (Diptera, Culicidae)
Source: MDPI journal article supplement (doi:10.3390/biology11010057), 2022-01-01
Supplement: s1 [file s1]

# Immunohistochemical characterization of the nervous system of *Culex pipiens* (Diptera, Culicidae)

Katharina M. Gregor<sup>1,2</sup>, Stefanie Becker<sup>2</sup>, Fanny Hellhammer<sup>2</sup>, Wolfgang Baumgärtner<sup>1,\*</sup>, Christina Puff<sup>1</sup>

<sup>1</sup> Department of Pathology, University of Veterinary Medicine Hannover, Bünteweg 17, Lower Saxony, 30559 Hannover, Germany

<sup>2</sup> Institute for Parasitology and Research Center for Emerging Infections and Zoonoses (RIZ), University of Veterinary Medicine Hannover, Bünteweg 17, Lower Saxony, 30559 Hannover, Germany

\* Correspondence: Wolfgang.Baumgaertner@tiho-hannover.de, Phone: 0049 511 953 8620, Fax: 0049 511 953 8675

## Supplementary material

### S1. Interspecies multiple sequence alignment of the target epitope of antibodies used

S1.1 Bruchpilot (Gene ID: 35977)

S1.2 Elav (Gene ID: 31000)

S1.3 Futsch (Gene ID: 6724864)

S1.4 Gephyrin (Gene ID: 10243)

S1.5 Phosphosynapsin (Gene ID: 6853)

S1.6 Choline acetyltransferase (Gene ID: 42249)

S1.7 Glutamine synthetase (Gene ID: 2752)

S1.8 Tyrosine-hydroxylase (Gene ID: 25085)

The *in silico* assay for protein homologs identified respective protein sequences for *Drosophila melanogaster* and mosquito species such as *Culex quinquefasciatus*, showing homology between 39 to 65 % and 40 to 70 %, respectively. The homology to *Culex pipiens* biotype *molestus* could not be assessed due to lack of available sequences for comparison. The protein sequence alignments for each protein are shown below and further comprise percentage identity matrices for the respective protein. The epitope of interest is highlighted in yellow if provided by the manufacturer.

Sequence identities were marked underneath the protein alignment as follows:

\* (asterisk): indicates single fully conserved amino acid,

. (period): indicates strongly similar amino acids between groups,

: (colon): indicates weakly similar amino acids between groups.

## S1.1. Multiple sequence alignment for bruchpilot (Gene ID: 35977)

|                                             |                                                                |     |
|---------------------------------------------|----------------------------------------------------------------|-----|
| <i>Drosophila melanogaster</i> ; AFH07983.1 | msrddynpvtssgvrspgrvrrlqelptvdrspdrdygaprgsplamgspyyrdmdepts   | 60  |
| <i>Culex quinquefasciatus</i> ; EDS45873.1  | ----- 0                                                        |     |
| <i>Anopheles darlingi</i> ; ETN64951.1      | ----- 0                                                        |     |
| <i>Drosophila melanogaster</i> ; AFH07983.1 | pagaghrrsrsarppmahamdyprrtryqslldrgglvdphdrefipreprdrsrdsle    | 120 |
| <i>Culex quinquefasciatus</i> ; EDS45873.1  | ----- 0                                                        |     |
| <i>Anopheles darlingi</i> ; ETN64951.1      | ----- 0                                                        |     |
| <i>Drosophila melanogaster</i> ; AFH07983.1 | rglyledelygrsarqspmsamggyntgmgsptsdraylgdlqhqnldlqrelgnlkrelel | 180 |
| <i>Culex quinquefasciatus</i> ; EDS45873.1  | ----- 0                                                        |     |
| <i>Anopheles darlingi</i> ; ETN64951.1      | ----- 0                                                        |     |
| <i>Drosophila melanogaster</i> ; AFH07983.1 | tnqklgssmhsiktfwspelkeralrkeesakyslindqlklstenqkqamlvrqlee     | 240 |
| <i>Culex quinquefasciatus</i> ; EDS45873.1  | ----- 0                                                        |     |
| <i>Anopheles darlingi</i> ; ETN64951.1      | ----- 0                                                        |     |
| <i>Drosophila melanogaster</i> ; AFH07983.1 | elrlmrqpnlmqqqmeaiyaendhlqreisilretikdlecrvetqkqqliardesik     | 300 |
| <i>Culex quinquefasciatus</i> ; EDS45873.1  | ----- 0                                                        |     |
| <i>Anopheles darlingi</i> ; ETN64951.1      | ----- 0                                                        |     |

|                                             |                                                               |     |
|---------------------------------------------|---------------------------------------------------------------|-----|
| <i>Drosophila melanogaster</i> ; AFH07983.1 | kllemlqakgmgeeermfqqmqamaqkmynnytgasgssplpdiigqyygpgslgp      | 360 |
| <i>Culex quinquefasciatus</i> ; EDS45873.1  | -----0                                                        |     |
| <i>Anopheles darlingi</i> ; ETN64951.1      | -----marfyssnfh--10                                           |     |
| <i>Drosophila melanogaster</i> ; AFH07983.1 | gplsygsgngygppgydlygpststaaggyglydpqi ygpcqqtspirrrysia glpsa | 420 |
| <i>Culex quinquefasciatus</i> ; EDS45873.1  | -----0                                                        |     |
| <i>Anopheles darlingi</i> ; ETN64951.1      | -----napaskf-----ldvrsgrlparrysisgs vpl                       | 38  |
| <i>Drosophila melanogaster</i> ; AFH07983.1 | tmyndvygyp-applqqtsssnivnlneahksisr ssqilnltnqarqlgqlvt tpgg  | 479 |
| <i>Culex quinquefasciatus</i> ; EDS45873.1  | -----0                                                        |     |
| <i>Anopheles darlingi</i> ; ETN64951.1      | ssmvdycnlsenaanlykhsanltnlnettkslsrssnilnrcvppst---vthtlp-    | 94  |
| <i>Drosophila melanogaster</i> ; AFH07983.1 | ggvgmg lgrvvssyptlhpgdtppylndnlmqmstsfssqpnmyfq pqaqvqvlptql  | 539 |
| <i>Culex quinquefasciatus</i> ; EDS45873.1  | -----0                                                        |     |
| <i>Anopheles darlingi</i> ; ETN64951.1      | gaigsnnngnscpltfppsssq-----pvpppqs                            | 125 |
| <i>Drosophila melanogaster</i> ; AFH07983.1 | taaqsaaaaarlrpaysvtnlvssyptttaagygckygyggnpyqsd lgygnplapfqq  | 599 |
| <i>Culex quinquefasciatus</i> ; EDS45873.1  | -----0                                                        |     |
| <i>Anopheles darlingi</i> ; ETN64951.1      | tip-ssagsvfdpspsisler-iaasaastvmgftcsypnagssaklp saidn-----   | 176 |

| Species                        | Gene       | Accession | Protein | Length |
|--------------------------------|------------|-----------|---------|--------|
| <i>Drosophila melanogaster</i> | AFH07983.1 | 659       |         |        |
| <i>Culex quinquefasciatus</i>  | EDS45873.1 | 0         |         |        |
| <i>Anopheles darlingi</i>      | ETN64951.1 | 188       |         |        |
| <i>Drosophila melanogaster</i> | AFH07983.1 | 718       |         |        |
| <i>Culex quinquefasciatus</i>  | EDS45873.1 | 13        |         |        |
| <i>Anopheles darlingi</i>      | ETN64951.1 | 227       |         |        |
| <i>Drosophila melanogaster</i> | AFH07983.1 | 777       |         |        |
| <i>Culex quinquefasciatus</i>  | EDS45873.1 | 26        |         |        |
| <i>Anopheles darlingi</i>      | ETN64951.1 | 243       |         |        |
| <i>Drosophila melanogaster</i> | AFH07983.1 | 837       |         |        |
| <i>Culex quinquefasciatus</i>  | EDS45873.1 | 41        |         |        |
| <i>Anopheles darlingi</i>      | ETN64951.1 | 277       |         |        |
| <i>Drosophila melanogaster</i> | AFH07983.1 | 897       |         |        |
| <i>Culex quinquefasciatus</i>  | EDS45873.1 | 101       |         |        |
| <i>Anopheles darlingi</i>      | ETN64951.1 | 337       |         |        |

[illegible]

---

|                                             |                                                             |      |
|---------------------------------------------|-------------------------------------------------------------|------|
| <i>Drosophila melanogaster</i> ; AFH07983.1 | klqnsldkaqnevdlhldkldkactenrrlvlekekitydydnlsqldkalgqaarmqk | 1257 |
| <i>Culex quinquefasciatus</i> ; EDS45873.1  | kiqnaldkaqnevdlhldkldksvgevrrlqlekekinyefeniqsldkqlgqssrvqk | 448  |
| <i>Anopheles darlingi</i> ; ETN64951.1      | klqnsldkaqndvdlhldkldksvgeirrlqlekekinyefeniqsldkslgqssriqk | 639  |

\*\*\*.\*\*\*\*\*.\*\*\*\*\*.\*\*\*. \* \*\*\* \*\*\*\*\* \*...\*\*\*\*\* \*\*\*\*..\*.\*

|                                             |                                                           |      |
|---------------------------------------------|-----------------------------------------------------------|------|
| <i>Drosophila melanogaster</i> ; AFH07983.1 | eretlsldtdrrekletqvqlgriqkerdqfsdeletlkersesaqtlmkaardrea | 1317 |
| <i>Culex quinquefasciatus</i> ; EDS45873.1  | ereavqmdleryrdkdklqtalsrlqkerdilgdekllekaegtqssalkyqrerda | 508  |
| <i>Anopheles darlingi</i> ; ETN64951.1      | ekeaaqldldryrdkdklqstvarlqkerdilecmkkesestqsnalkyqrerda   | 699  |

\*.\*. .\*. \*.\* \*.\* \*.\* \*.\* \*\*\*\*\* . \*\*\*\*\* .\*\*\*.\*\*\*. .\*. \*.\*

|                                             |                                                              |      |
|---------------------------------------------|--------------------------------------------------------------|------|
| <i>Drosophila melanogaster</i> ; AFH07983.1 | mqtdlevlkeryekshaiqqklqmerddavteveilkekldkalyasqklidekdsnke  | 1377 |
| <i>Culex quinquefasciatus</i> ; EDS45873.1  | iqtelevvkerwekahqihqklqmerddavteidilkekldkalyasqklidekdnsnke | 568  |
| <i>Anopheles darlingi</i> ; ETN64951.1      | iqtelevvkerwekahqvhqklqmerddavteidilkekldkalyasqkvideketstke | 759  |

\*\*\*\*\*.\*\*\*.\*\*\*. \*..\*\*\*\*\*.\*\*\*\*\*.\*\*\*\*\*.\*\*\*\*\*.\*\*\*. \* \*\*

|                                             |                                                              |      |
|---------------------------------------------|--------------------------------------------------------------|------|
| <i>Drosophila melanogaster</i> ; AFH07983.1 | fekmlekydraqneiyrlqsrcdtaeadrarleveaersglaaskaredlrklqdestrl | 1437 |
| <i>Culex quinquefasciatus</i> ; EDS45873.1  | fekmlekydrsqneiyrlqsrcdtaeadrnleveaersalaaakakedlrklqeettrl  | 628  |
| <i>Anopheles darlingi</i> ; ETN64951.1      | fekmlekydraqneiyrlqsrvtadearnrleienersalatnkakedlrklqeetsrl  | 819  |

\*\*\*\*\*.\*\*\*\*\*.\*\*\*\*\* \*\*\*\*\* \*\*\*\*\* \*.\* \*.\* \*\*\*\*\*.\*..\*\*

|                                             |                                                            |      |
|---------------------------------------------|------------------------------------------------------------|------|
| <i>Drosophila melanogaster</i> ; AFH07983.1 | qeadraalqlsrakecednarlehsrdrfdklqtdirraqgekehfselervtyel   | 1497 |
| <i>Culex quinquefasciatus</i> ; EDS45873.1  | qeadraamqlgrskeledkakedvdlirerldktqadlrraqakeniqaevertlyel | 688  |
| <i>Anopheles darlingi</i> ; ETN64951.1      | qeadraamqlgrskeledkakedvdmirerldkcqtdlrraqekenmqtelertlyel | 879  |

\*\*\*\*\*.\*.\* \*.\* \*.\* \*.\* \*.\* \*.\* \*.\* \*\*\*\*\* \*\*\*\*\*.\*.\*.\*.\*

|                                             |                                                                    |
|---------------------------------------------|--------------------------------------------------------------------|
| <i>Drosophila melanogaster</i> ; AFH07983.1 | erahaqaqtkaasveaakeeahyavelekmdryeksqvelrklqtdtdfgrerlrke 1557     |
| <i>Culex quinquefasciatus</i> ; EDS45873.1  | drahnsytktqasldaaqeeaaarysleiekmreryektaaemrrlqgenesfsresrrlke 748 |
| <i>Anopheles darlingi</i> ; ETN64951.1      | drshnmytkqtasldsageevarygleiekmreryektaaelrrlqgenesfsrearrmkd939   |

.\*.\*      \*\* .\*\*...\*.\*\* \*.\* \*.\*\*\*\*\*.\*\*\*\*\*. \*.\*.\*.\*. ..\* \*\*.\*.\*.\*.

|                                             |                                                                  |
|---------------------------------------------|------------------------------------------------------------------|
| <i>Drosophila melanogaster</i> ; AFH07983.1 | enerlrekldktlmeletirgksqyesefekykdkyekiemevqnmesklhetslql 1617   |
| <i>Culex quinquefasciatus</i> ; EDS45873.1  | endrlrekdydkmmelenfrsksqyeetlekfkqkfelrenecqtmelklheatlql 808    |
| <i>Anopheles darlingi</i> ; ETN64951.1      | endrlrekdydkvivelenfrgksqyegetfdkmekekfemrenefgtmelklhetslql 999 |

\*\*\*\*\* \*\* ..\*\*\* .\* \*\*\*\*\* \*...\* \*.\*. \* \* \* \* \* \*\*\*\*\*..\*\*\*.\*

|                                             |                                                                    |
|---------------------------------------------|--------------------------------------------------------------------|
| <i>Drosophila melanogaster</i> ; AFH07983.1 | skgevakmlanqekqrselerahierekardkhekllkevdrllrqqs-svspgdpvras1676   |
| <i>Culex quinquefasciatus</i> ; EDS45873.1  | arqevqkliasqdkqrtdaerahieyekirdkhekllkemerlrnpgpsavspgalaa-- 866   |
| <i>Anopheles darlingi</i> ; ETN64951.1      | araevakmvangekqrttdserahieyekirdkhekllkeverlrnpgpsaispgaltt-- 1057 |

.. \*\* \*..\* \*.\*\*\*.. \*\*\*\*\* \*\* \*\*\*\*\*.....\*\*\* .       ..\*\*\*

|                                             |                                                              |      |
|---------------------------------------------|--------------------------------------------------------------|------|
| <i>Drosophila melanogaster</i> ; AFH07983.1 | tssssalsagerqeidrlrdrlekalqsrdateagrlakelekaqmhlakqqentest   | 1736 |
| <i>Culex quinquefasciatus</i> ; EDS45873.1  | ----asvvgmgdkneidrldrlekalqsrdatemeagrlakelekaqlhlakqqeayeat | 922  |
| <i>Anopheles darlingi</i> ; ETN64951.1      | --aatstgltdkneidrldrlekalqsrdateagrlakelekaqihltkqqgevyeat   | 1115 |

```
..      ...*****.*****.*****.***.*****      *.*
```

|                                             |                                                              |      |
|---------------------------------------------|--------------------------------------------------------------|------|
| <i>Drosophila melanogaster</i> ; AFH07983.1 | riefermgaelgrlhrlekaeaerealqanrsggag---aaphpqlekhvqklesdvk   | 1793 |
| <i>Culex quinquefasciatus</i> ; EDS45873.1  | riefermsaeltrvlerlekseaketlrqstkiyekhhqqaacnnidqnvlikieadnk  | 982  |
| <i>Anopheles darlingi</i> ; ETN64951.1      | riefermsaeltrvlerlekseaketlrqstkiyekhhqqaannhhvehnnihkieadnk | 1175 |

\*\*\*\*\* \*\*\* \*. \*\*\*\*\*.\*.\*.\*. . \* ..... \*.\*. \* \*

|                                             |                                                                                                                                |      |
|---------------------------------------------|--------------------------------------------------------------------------------------------------------------------------------|------|
| <i>Drosophila melanogaster</i> ; AFH07983.1 | qlamereqvlqleksqeilmnfqkelqnaaealqktreenrklrnghqvppvaappagp                                                                    | 1853 |
| <i>Culex quinquefasciatus</i> ; EDS45873.1  | qlmaerdqlvmqleksqdmlmsfqqlnaaelelqrqceenrrlknsppgahg-----                                                                      | 1035 |
| <i>Anopheles darlingi</i> ; ETN64951.1      | qlmaerdqlvmqleksqdmlmsfqqlnaaelelqrqceenrrlktspqqpqstgpta--                                                                    | 1233 |
|                                             | <div style="text-align: center;">**    **..***..*****..** ..*.***. ** ***.    *****..* *</div>                                 |      |
| <i>Drosophila melanogaster</i> ; AFH07983.1 | spaefqamqkeiqtlqqklqeseralqaagpqqaqaaaaagasreeieqwrvkieqeksr                                                                   | 1913 |
| <i>Culex quinquefasciatus</i> ; EDS45873.1  | ---qpqnnsqeiqnykkeitrllkqmlqet-----gargdseleqwrvvveqeknr                                                                       | 1082 |
| <i>Anopheles darlingi</i> ; ETN64951.1      | --aqnqataqeiqsykkeinkllkqmlqet-----gcrgdneleqwrvvveqeknr                                                                       | 1281 |
|                                             | <div style="text-align: center;">: *       :***. .... :. **:             . .:*****.**</div>                                    |      |
| <i>Drosophila melanogaster</i> ; AFH07983.1 | admadkaaqemhkriqlmdqhikdqhaqm qkmqqmqmqqqqaaqqavqqaqqqqsaaga                                                                   | 1973 |
| <i>Culex quinquefasciatus</i> ; EDS45873.1  | adqaekaaielqkrmqvmeqqllkqqlqmtnmqkqmttqqpppq-----ppppqq                                                                        | 1132 |
| <i>Anopheles darlingi</i> ; ETN64951.1      | adqaekaaielqkrmqlemeqqllkqqlqmtnmqkqmqmqqstqqq-----                                                                            | 1325 |
|                                             | <div style="text-align: center;">** *.*** **..***..*..*..*    ** ..*** **       *</div>                                        |      |
| <i>Drosophila melanogaster</i> ; AFH07983.1 | ggadpkелеkvrgelqaacterdrfqqllellvtelekskmsnqeakqlqtaqqqvqq                                                                     | 2033 |
| <i>Culex quinquefasciatus</i> ; EDS45873.1  | pqipnkemdkiqeelnnavtqrdfqnqllellvqeleksqlaeqdaakkaqqqhqlqqm                                                                    | 1192 |
| <i>Anopheles darlingi</i> ; ETN64951.1      | spvnkkelqlqdelktavtqrdfqnqllellvqeleksqteaqaatnakqqqqqlahl                                                                     | 1385 |
|                                             | <div style="text-align: center;">: ***..*.. **..* *.***..***..***** *****. *. ... *    *.. :</div>                             |      |
| <i>Drosophila melanogaster</i> ; AFH07983.1 | qqqvqqllqqmqqlqqaasa----gagatdvqrqqleqqkqlleevrkqidnqakategе                                                                   | 2089 |
| <i>Culex quinquefasciatus</i> ; EDS45873.1  | eqqiqlvqlqelqhatqaanqkaaqqagisehdr-----kqlaemkqiedatrllese                                                                     | 1245 |
| <i>Anopheles darlingi</i> ; ETN64951.1      | qqqiqlqqllqqvtqaanqkvaqngvseae-----kqlaemkqiedatrllese                                                                         | 1438 |
|                                             | <div style="text-align: center;">-***- ***..*      ***                  * -- *                  ****       ***.. ..    *</div> |      |



---

|                                             |                                                           |      |
|---------------------------------------------|-----------------------------------------------------------|------|
| <i>Drosophila melanogaster</i> ; AFH07983.1 | rkiideqrkqidakrkdieekkkmaefdvqlrkrkeqmdqleqltqgggaaaageln | 2149 |
| <i>Culex quinquefasciatus</i> ; EDS45873.1  | rktfedqrkvienkrkeleekeknlvfdkqlkrkeqmdqleqlkaggttaaageln  | 1305 |
| <i>Anopheles darlingi</i> ; ETN64951.1      | rktfedqrktietkrkdledkeknliefdkqlkrkeqmdqleqlkaggttaaageln | 1498 |

\*\*\*...\*\*\* \* . \*\*\*..\*.\*.\*.. \*\*\* \*\*..\*\*\*\*\*.\*\*\*\*\* \*\* .\*\*\*\*\*

|                                             |                                                              |      |
|---------------------------------------------|--------------------------------------------------------------|------|
| <i>Drosophila melanogaster</i> ; AFH07983.1 | kkImdtqrqleacvkelqntkeehkkaateterllqlvqmsqeeqnakektimdlqqalk | 2209 |
| <i>Culex quinquefasciatus</i> ; EDS45873.1  | kqltetqqldkitkdfneakedaqrsoaeterllqlvqmtqeeqnqkektimdlqqalk  | 1365 |
| <i>Anopheles darlingi</i> ; ETN64951.1      | kqltetqqmleqaskdlaeaeeaaqrsoaeterllqlvqmtqeeqnqkektimdlqqalk | 1558 |

\*.\* .\*. \* . \*.. ...\* .\*\*\*.\*\*\*\*\*.\*\*\*\*\* \*\*\*\*\*

|                                             |                               |      |
|---------------------------------------------|-------------------------------|------|
| <i>Drosophila melanogaster</i> ; AFH07983.1 | iaqakvkqaqtqqqqqdagpagflksff  | 2238 |
| <i>Culex quinquefasciatus</i> ; EDS45873.1  | naqaklktaga---qpqdagpagflksff | 1391 |
| <i>Anopheles darlingi</i> ; ETN64951.1      | naqaklksaga---qpqdagpagflksff | 1584 |

\*\*\*\*.\* \*\* . \* \*\*\*\*\*

---

| Percent Identity Matrix for bruchpilot      | <i>Drosophila melanogaster</i> ; AFH07983.1 | <i>Culex quinquefasciatus</i> ; EDS45873.1 | <i>Anopheles darlingi</i> ; ETN64951.1 |
|---------------------------------------------|---------------------------------------------|--------------------------------------------|----------------------------------------|
| <i>Drosophila melanogaster</i> ; AFH07983.1 | 100.00                                      | 64.69                                      | 60.58                                  |
| <i>Culex quinquefasciatus</i> ; EDS45873.1  | 64.69                                       | 100.00                                     | 83.58                                  |
| <i>Anopheles darlingi</i> ; ETN64951.1      | 60.58                                       | 83.58                                      | 100.00                                 |

S1.2. Multiple sequence alignment for elav (Gene ID: 31000)

|                                                |                                                             |     |
|------------------------------------------------|-------------------------------------------------------------|-----|
| <i>Drosophila melanogaster</i> ; AAA28506.1    | mdfimantgagggvdtqaqlmqsaavaaatnaaaapvqnaaavaaaqlqqqvqqa     | 60  |
| <i>Anopheles merus</i> ; XP_041763802.1        | -----                                                       | 0   |
| <i>Anopheles coluzzii</i> ; XP_040220033.1     | -----                                                       | 0   |
| <i>Culex quinquefasciatus</i> ; XP_038115089.1 | -----                                                       | 0   |
| <i>Culex pipiens pallens</i> ; XP_039431435.1  | -----                                                       | 0   |
| <i>Aedes aegypti</i> ; XP_001658986.1          | -----                                                       | 0   |
|                                                |                                                             |     |
| <i>Drosophila melanogaster</i> ; AAA28506.1    | ilqvqqqtqqavaaaaaavtqqllqqqqqavvaqqavvqqqqqaaavvqqaavqqavvp | 120 |
| <i>Anopheles merus</i> ; XP_041763802.1        | -----mtnkvlaavqdlqkqqqqqqqq--qqqqq-----qq--qq               | 33  |
| <i>Anopheles coluzzii</i> ; XP_040220033.1     | -----mtnkvlaavqdlqkqqqqqqqq--qq--qq-----qq--qq              | 31  |
| <i>Culex quinquefasciatus</i> ; XP_038115089.1 | -----mtnkvlaavqdlqkqngesqqnt-----                           | 23  |
| <i>Culex pipiens pallens</i> ; XP_039431435.1  | -----mtnkvlaavqdlqkqngesqqnt-----                           | 23  |
| <i>Aedes aegypti</i> ; XP_001658986.1          | -----mtnkvlaavqdlqkqngesqn-t-----                           | 22  |
| :: . * **.*:                                   |                                                             |     |
|                                                |                                                             |     |
| <i>Drosophila melanogaster</i> ; AAA28506.1    | qpqqaqpntngnag-----sgsqngsngstetrtnlivnlpqmtedeirs          | 167 |
| <i>Anopheles merus</i> ; XP_041763802.1        | qqqqqqngangggggggeagqtvaggaagggqssdnrsrtnlivnlpqmtteeirs    | 93  |
| <i>Anopheles coluzzii</i> ; XP_040220033.1     | qqqqqqngangggggggeagqtvaggaagggqssdnrsrtnlivnlpqmtteeirs    | 91  |
| <i>Culex quinquefasciatus</i> ; XP_038115089.1 | -----taassgsdnartnlivnlpqmtteeirs                           | 53  |
| <i>Culex pipiens pallens</i> ; XP_039431435.1  | -----taassgsdnartnlivnlpqmtteeirs                           | 53  |
| <i>Aedes aegypti</i> ; XP_001658986.1          | -----aaaasgsetartnlivnlpqmtteeirs                           | 52  |
| . ... :*****.*                                 |                                                             |     |

|                                                |                                                              |     |
|------------------------------------------------|--------------------------------------------------------------|-----|
| <i>Drosophila melanogaster</i> ; AAA28506.1    | lfssvgeiesvklirdksqvyidplnpqapskgqslgygfvnyvrpqdaeqavnvInglr | 227 |
| <i>Anopheles merus</i> ; XP_041763802.1        | lfssvgeivesvklvrdknviypg-----qpkgqslgygfvnyhrpqdaeqavnvInglr | 147 |
| <i>Anopheles coluzzii</i> ; XP_040220033.1     | lfssvgeivesvklvrdknviypg-----qpkgqslgygfvnyhrpqdaeqavnvInglr | 145 |
| <i>Culex quinquefasciatus</i> ; XP_038115089.1 | lfssvgeivesvklvrdknviypg-----qpkgqslgygfvnfhrsdaeqavnvInglr  | 107 |
| <i>Culex pipiens pallens</i> ; XP_039431435.1  | lfssvgeivesvklvrdknviypg-----qpkgqslgygfvnfhrsdaeqavnvInglr  | 107 |
| <i>Aedes aegypti</i> ; XP_001658986.1          | lfssvgeivesvklvrdknviypg-----qpkgqslgygfvnfhrsdaeqavnvInglr  | 106 |

\*\*\*\*\*.\*\*\*\*\*.\*. \* \*\*\*\*\*. \* \*\*\*\*\*

|                                                |                                                               |     |
|------------------------------------------------|---------------------------------------------------------------|-----|
| <i>Drosophila melanogaster</i> ; AAA28506.1    | lqnktikvsfarpssdaikganlyvsglpkmtmqealeifapfgaiitsrilqnagndt   | 287 |
| <i>Anopheles merus</i> ; XP_041763802.1        | lqnkvkvsfarpsssegikganlyisglpktitqeeletifrpypgeiitsrvliqdgnd- | 206 |
| <i>Anopheles coluzzii</i> ; XP_040220033.1     | lqnkvkvsfarpsssegikganlyisglpktitqeeletifrpypgeiitsrvliqdgnd- | 204 |
| <i>Culex quinquefasciatus</i> ; XP_038115089.1 | lqnkvkvsfarpsssegikganlyisglpktitqeeleiifrpypgeiitsrvlvqdgnd- | 166 |
| <i>Culex pipiens pallens</i> ; XP_039431435.1  | lqnkvkvsfarpsssegikganlyisglpktitqeeleiifrpypgeiitsrvlvqdgnd- | 166 |
| <i>Aedes aegypti</i> ; XP_001658986.1          | lqnkvkvsfarpsssegikganlyisglpktitqeeletifrpypgeiitsrvlvqegnd- | 165 |

\*\*\*\*.\*\*\*\*\*.\*\*\*\*\*.\*\*\*\*\*.\*.\* \*.\* \*\*\*\*\*.\*.\*\*\*

|                                                |                                                               |     |
|------------------------------------------------|---------------------------------------------------------------|-----|
| <i>Drosophila melanogaster</i> ; AAA28506.1    | qtkgvgfirfdkreeatraiialngtppsctdpivvkfsntpgs--tskiiqpqlpafl   | 345 |
| <i>Anopheles merus</i> ; XP_041763802.1        | kpkgvggfirfdqrkearaiaqalngttpkgldpitvkfsntpgqnaaakvvqpaplafl  | 266 |
| <i>Anopheles coluzzii</i> ; XP_040220033.1     | kpkgvggfirfdqrkearaiaqalngttpkgldpitvkfsntpgqnaaakvvqpaplafl  | 264 |
| <i>Culex quinquefasciatus</i> ; XP_038115089.1 | kpkgvggfirfdqrkearaiaaialngttpkgldpitvkfsntpgqnstakivqpaplafl | 226 |
| <i>Culex pipiens pallens</i> ; XP_039431435.1  | kpkgvggfirfdqrkearaiaaialngttpkgldpitvkfsntpgqnstakivqpaplafl | 226 |
| <i>Aedes aegypti</i> ; XP_001658986.1          | kpkgvggfirfdqrkearaiaaialngttpkgldpitvkfsntpgqntaakivqpaplafl | 225 |

. \*\*\*\*\*.\*.\* \*.\* \*\*\*\*\*. \*\*\*\*\*. \*\*\*\*\*. \*\*\*\*\*.\*\*\*\*\*



---

| <b>Percent Identity Matrix for elav</b>        | <i>Drosophila melanogaster</i> ; AAA28506.1 | <i>Anopheles merus</i> ; XP_041763802.1 | <i>Anopheles coluzzii</i> ; XP_040220033.1 | <i>Culex quinquefasciatus</i> ; XP_038115089.1 | <i>Culex pipiens pallens</i> ; XP_039431435.1 | <i>Aedes aegypti</i> ; XP_001658986.1 |
|------------------------------------------------|---------------------------------------------|-----------------------------------------|--------------------------------------------|------------------------------------------------|-----------------------------------------------|---------------------------------------|
| <i>Drosophila melanogaster</i> ; AAA28506.1    | 100.00                                      | 69.37                                   | 69.21                                      | 70.22                                          | 70.22                                         | 69.86                                 |
| <i>Anopheles merus</i> ; XP_041763802.1        | 69.37                                       | 100.00                                  | 100.00                                     | 91.39                                          | 91.39                                         | 90.53                                 |
| <i>Anopheles coluzzii</i> ; XP_040220033.1     | 69.21                                       | 100.00                                  | 100.00                                     | 91.39                                          | 91.39                                         | 90.53                                 |
| <i>Culex quinquefasciatus</i> ; XP_038115089.1 | 70.22                                       | 91.39                                   | 91.39                                      | 100.00                                         | 100.00                                        | 95.04                                 |
| <i>Culex pipiens pallens</i> ; XP_039431435.1  | 70.22                                       | 91.39                                   | 91.39                                      | 100.00                                         | 100.00                                        | 95.04                                 |
| <i>Aedes aegypti</i> ; XP_001658986.1          | 69.86                                       | 90.53                                   | 90.53                                      | 95.04                                          | 95.04                                         | 100.00                                |

---

S1.3. Multiple sequence alignment for futsch (Gene ID: 6724864)

|                                               |                                                               |    |
|-----------------------------------------------|---------------------------------------------------------------|----|
| <i>Anopheles merus</i> ; XP_041782981.1       | -----miirssglfgldqhtma                                        | 17 |
| <i>Anopheles arabiensis</i> ; XP_040172246.1  | -----miirssglfgldqhtma                                        | 17 |
| <i>Anopheles coluzzii</i> ; XP_040218532.1    | -----miirssglfgldqhtma                                        | 17 |
| <i>Anopheles darlingi</i> ; ETN65512.1        | -----mgnlv-ckepnpgttasntgntfsnlssiicpnlgskgkahpmr             | 43 |
| <i>Aedes albopictus</i> ; XP_029723621.1      | mpittpkvpdglpelmr glaksvikenpeniyvhaaeyfen-lirerdggldrgyqnfsa | 59 |
| <i>Drosophila melanogaster</i> ; ABW09325.1   | -----mgdqpkkatttatggaagpvpegdav-mattnqdalakgagdgpa            | 43 |
| <i>Aedes aegypti</i> ; XP_021710788.1         | -----msgdqsgpielngtst-gingggagv-dgivtngg-----                 | 33 |
| <i>Culex quinquefasciatus</i> ; EDS38616.1    | -----                                                         | 0  |
| <i>Culex pipiens pallens</i> ; XP_039443854.1 | -----msagdqs splelngsgaaatgggegl-ngnatengl-----               | 37 |
|                                               |                                                               |    |
| <i>Anopheles merus</i> ; XP_041782981.1       | yllvalalalipthasapmyesdq-----                                 | 41 |
| <i>Anopheles arabiensis</i> ; XP_040172246.1  | flvalaltlipaahsapmyesdq-----                                  | 41 |
| <i>Anopheles coluzzii</i> ; XP_040218532.1    | yllvalaltlipaahsapmyesdq-----                                 | 41 |
| <i>Anopheles darlingi</i> ; ETN65512.1        | ktyftrs-----avd-askktssg-----httstgw-----qsvgl                | 73 |
| <i>Aedes albopictus</i> ; XP_029723621.1      | ykvy-----adykekcrgkggngeslsggeip-----ssaggvavrsr              | 97 |
| <i>Drosophila melanogaster</i> ; ABW09325.1   | qdaaqep-----gqaehgepgdggd--ggddgatdagassl---p---pseiggrapldt  | 90 |
| <i>Aedes aegypti</i> ; XP_021710788.1         | -----ip-----gge-stmnggggg--gge--aitpggggggsea-----gglgglstvda | 73 |
| <i>Culex quinquefasciatus</i> ; EDS38616.1    | -----                                                         | 0  |
| <i>Culex pipiens pallens</i> ; XP_039443854.1 | ----gap-----geg-atmnggggg--ggdggvtspgggagdvseeagtgagdpvmalda  | 85 |

|                                               |                                                              |     |
|-----------------------------------------------|--------------------------------------------------------------|-----|
| <i>Anopheles merus</i> ; XP_041782981.1       | -----telenygestgcyynynhygegdrimtnepclnctchdrmlm              | 83  |
| <i>Anopheles arabiensis</i> ; XP_040172246.1  | -----telenygestgcyynynhygegdrimtnepclnctchdrmlm              | 83  |
| <i>Anopheles coluzzii</i> ; XP_040218532.1    | -----telenygestgcyynynhygegdrimtnepclnctchdrmlm              | 83  |
| <i>Anopheles darlingi</i> ; ETN65512.1        | hvpdg-----asnkvitppvapprrkrgatldg---ryrsd-----               | 107 |
| <i>Aedes albopictus</i> ; XP_029723621.1      | masdgd dsggsasatr-----grrkkrv-rkqgske-----snk----            | 131 |
| <i>Drosophila melanogaster</i> ; ABW09325.1   | acsdad---ggapsslaggivgppspltgcylliv-lgephse-----ehkdnil      | 136 |
| <i>Aedes aegypti</i> ; XP_021710788.1         | gcseg-----pssii--gvgppspltgcyllii-igephsq-----ehkdiiv        | 113 |
| <i>Culex quinquefasciatus</i> ; EDS38616.1    | -----                                                        | 0   |
| <i>Culex pipiens pallens</i> ; XP_039443854.1 | gcsdg-----pssii--gvgppspltgcyllii-vgephsq-----dhkdiil        | 125 |
|                                               |                                                              |     |
| <i>Anopheles merus</i> ; XP_041782981.1       | cylrvcpftkaigqdqctiekredqccpvitcpevevqlvdhqtaspssalgatagsevg | 143 |
| <i>Anopheles arabiensis</i> ; XP_040172246.1  | cylrvcpftkaigqdqctiekredqccpvitcpevevqlvdhqtaspssalgatagsevg | 143 |
| <i>Anopheles coluzzii</i> ; XP_040218532.1    | cylrvcpftkaigqdqctiekredqccpvitcpevevqlvdhqtaspssalgatagsevg | 143 |
| <i>Anopheles darlingi</i> ; ETN65512.1        | -----                                                        | 107 |
| <i>Aedes albopictus</i> ; XP_029723621.1      | -----slekqesigsitenggeek-----kpt---s-adgslqe                 | 162 |
| <i>Drosophila melanogaster</i> ; ABW09325.1   | -qhllkgflswdvsdchvdleeeIntitqhape-----g-earhge               | 176 |
| <i>Aedes aegypti</i> ; XP_021710788.1         | -qrlikgflswdatdchvdleeehtitlqale-----g-eegkhge               | 153 |
| <i>Culex quinquefasciatus</i> ; EDS38616.1    | -----mgkge                                                   | 5   |
| <i>Culex pipiens pallens</i> ; XP_039443854.1 | -qrlikgflswdvsdchvdleeehtitlqale-----g-eegkhge               | 165 |



---

|                                               |                                                              |     |
|-----------------------------------------------|--------------------------------------------------------------|-----|
| <i>Anopheles merus</i> ; XP_041782981.1       | sldqygcsingrfypegaqvpsnpqkpcelcycirnmttcvmqectlhidgcqp-----  | 197 |
| <i>Anopheles arabiensis</i> ; XP_040172246.1  | sldqygcsingrfypegaqvpsnpqkpcelcycirnmttcvmqectlhidgcqp-----  | 197 |
| <i>Anopheles coluzzii</i> ; XP_040218532.1    | sldqygcsingrfypegaqvpsnpqkpcelcycirnmttcvmqectlhidgcqp-----  | 197 |
| <i>Anopheles darlingi</i> ; ETN65512.1        | -----                                                        | 107 |
| <i>Aedes albopictus</i> ; XP_029723621.1      | slipikedtp-----dieeavv---kvqahlecqaprerpfnksvsv--dsvaaasavss | 212 |
| <i>Drosophila melanogaster</i> ; ABW09325.1   | rliqyasenl-----vtevlhp-qyntliqcmrnlssftrhrhiihagytfsngsw     | 229 |
| <i>Aedes aegypti</i> ; XP_021710788.1         | rliqyasenl-----vteilihp-qintfiqcirnllssftrhrhiihtgytfagngsw  | 206 |
| <i>Culex quinquefasciatus</i> ; EDS38616.1    | rliqyasenl-----vteilihp-qintfiqcirnllssftrhrhiihtgytfagngsw  | 58  |
| <i>Culex pipiens pallens</i> ; XP_039443854.1 | rliqyasenl-----vteilihp-qintfiqcirnllssftrhrhiihtgytfagngsw  | 218 |
|                                               |                                                              |     |
| <i>Anopheles merus</i> ; XP_041782981.1       | iyngk-----vccpvk-ydcdhdkd-----                               | 216 |
| <i>Anopheles arabiensis</i> ; XP_040172246.1  | iyngk-----vccpvk-ydcdhdkd-----                               | 216 |
| <i>Anopheles coluzzii</i> ; XP_040218532.1    | iyngk-----vccpvk-ydcdhdkd-----                               | 216 |
| <i>Anopheles darlingi</i> ; ETN65512.1        | -----                                                        | 107 |
| <i>Aedes albopictus</i> ; XP_029723621.1      | vlqdageeaddadretgeaieqtveadlaaelghpincdvsyppdeted-----       | 263 |
| <i>Drosophila melanogaster</i> ; ABW09325.1   | ilqdgtsvadfseafqehdvqrvirayadtitmnihcadaglwhtlpekafarqcriri  | 289 |
| <i>Aedes aegypti</i> ; XP_021710788.1         | ilqdgtsvdfmeafrehevqrvlraypdtitmdvhcapvgnwqaiqdksfarlcrl     | 266 |
| <i>Culex quinquefasciatus</i> ; EDS38616.1    | vlqdgtsvdfleafqehvqrvlraypdtitmdvhcapvgnwvsiqdktlarlcrrl     | 118 |
| <i>Culex pipiens pallens</i> ; XP_039443854.1 | vlqdgtsvdfleafqehvqrvlraypdtitmdvhcapvgnwvsiqdktlarlcrrl     | 278 |

---

|                                               |                                                              |     |
|-----------------------------------------------|--------------------------------------------------------------|-----|
| <i>Anopheles merus</i> ; XP_041782981.1       | -stlm-----ledehtttvrpt-----pgfilt-ttvspavstdcv               | 250 |
| <i>Anopheles arabiensis</i> ; XP_040172246.1  | -stlm-----ledehtttvrpt-----pgfilt-ttvspavstdcv               | 250 |
| <i>Anopheles coluzzii</i> ; XP_040218532.1    | -stlm-----ledehtttvrpt-----pgfilt-ttvspavstdcv               | 250 |
| <i>Anopheles darlingi</i> ; ETN65512.1        | -----                                                        | 107 |
| <i>Aedes albopictus</i> ; XP_029723621.1      | -----dpeagng-edygsapstae-----vggevigdaevln--dappngsdqvv      | 306 |
| <i>Drosophila melanogaster</i> ; ABW09325.1   | npvdvldtssecingfidylapmvmptslrelletsdvvgnirfthptlyvfpgggqdaa | 349 |
| <i>Aedes aegypti</i> ; XP_021710788.1         | npvdvlssgseklnafvdylasmivpteisellessdvvgnirfshptlyvfpgggqdaa | 326 |
| <i>Culex quinquefasciatus</i> ; EDS38616.1    | npvdvlssgsklnafvdylasmivpteisellessdvvgnirfshptlyvfpgggqdaa  | 178 |
| <i>Culex pipiens pallens</i> ; XP_039443854.1 | npvdvlssgsklnafvdylasmivpteisellessdvvgnirfshptlyvfpgggqdaa  | 338 |
|                                               |                                                              |     |
| <i>Anopheles merus</i> ; XP_041782981.1       | hnge--tyadgalimtd--kpcehcycmrgdivcavqecgtplenegknctalppaagqc | 306 |
| <i>Anopheles arabiensis</i> ; XP_040172246.1  | hnge--tyadgalimtd--kpcehcycmrgdivcavqecgtplenegknctalppaagqc | 306 |
| <i>Anopheles coluzzii</i> ; XP_040218532.1    | hnge--tyadgalimtd--kpcehcycmrgdivcavqecgtplenegknctalppaagqc | 306 |
| <i>Anopheles darlingi</i> ; ETN65512.1        | ---ealkvkngfqdvfgresrrhscdithgtrpasv-----                    | 140 |
| <i>Aedes albopictus</i> ; XP_029723621.1      | viessqknsdevdlsvddvannneeplangsveeqi-----                    | 342 |
| <i>Drosophila melanogaster</i> ; ABW09325.1   | lfgi----ngfnmlvdggfnrkacfw---dfarhl-----                     | 377 |
| <i>Aedes aegypti</i> ; XP_021710788.1         | lfgi----ngfnmlvdggfsrkscfw---dfvrhl-----                     | 354 |
| <i>Culex quinquefasciatus</i> ; EDS38616.1    | lfgi----ngfnmlvdggfsrkscfw---dfvrhl-----                     | 206 |
| <i>Culex pipiens pallens</i> ; XP_039443854.1 | lfgi----ngfnmlvdggfsrkscfw---dfvrhl-----                     | 366 |

: . . :

---

|                                               |                                                            |     |
|-----------------------------------------------|------------------------------------------------------------|-----|
| <i>Anopheles merus</i> ; XP_041782981.1       | cpdkyicdgsaaapmtttvpavtaaadeaeqeqeqvaqsfdkapeqdeqqseatlt   | 366 |
| <i>Anopheles arabiensis</i> ; XP_040172246.1  | cpdkyicdgsaaapmtttvpavtaaaddaeqeeeqeqvaqsfdkapeqdeqqseatlt | 366 |
| <i>Anopheles coluzzii</i> ; XP_040218532.1    | cpdkyicdgsaaapmtttvpavttaaddveeqeqeqvaqsfdkapeqdeqqseatlt  | 366 |
| <i>Anopheles darlingi</i> ; ETN65512.1        | -pprrledslpamparqtscfeidasnd-----afsdfs-----               | 173 |
| <i>Aedes albopictus</i> ; XP_029723621.1      | -----dgaaeasve-----                                        | 351 |
| <i>Drosophila melanogaster</i> ; ABW09325.1   | -----drldavlmt-----                                        | 386 |
| <i>Aedes aegypti</i> ; XP_021710788.1         | -----drldavlmt-----                                        | 363 |
| <i>Culex quinquefasciatus</i> ; EDS38616.1    | -----drldavlmt-----                                        | 215 |
| <i>Culex pipiens pallens</i> ; XP_039443854.1 | -----drldavlmt-----                                        | 375 |

\*

|                                               |                                                         |     |
|-----------------------------------------------|---------------------------------------------------------|-----|
| <i>Anopheles merus</i> ; XP_041782981.1       | ttaasverttmpqhddvvpvekeedseddqqeqehvvpqfedvqtddshe----- | 417 |
| <i>Anopheles arabiensis</i> ; XP_040172246.1  | ttaasverttmpqhddvvpvekeedseddqqeqehvvpqfedvqtddshe----- | 417 |
| <i>Anopheles coluzzii</i> ; XP_040218532.1    | ttaasverttmpqhddvvpvekeedseddqqeqehvvpqfedvqtddshe----- | 417 |
| <i>Anopheles darlingi</i> ; ETN65512.1        | -----kvpttaelerspaaqiprvgnrks-----drffgehlstdslspeqdak  | 216 |
| <i>Aedes albopictus</i> ; XP_029723621.1      | -----kqdsaevqiegvdtdvde---svpvveevdesvnlp-----          | 384 |
| <i>Drosophila melanogaster</i> ; ABW09325.1   | -----rlnnsnvqglgavvsrkrdahvypqighffgnvp-----            | 420 |
| <i>Aedes aegypti</i> ; XP_021710788.1         | -----rinntnikgisavverkheahvypqighffcnip-----            | 397 |
| <i>Culex quinquefasciatus</i> ; EDS38616.1    | -----rinntnikgisavverkheahvypqighfftnip-----            | 249 |
| <i>Culex pipiens pallens</i> ; XP_039443854.1 | -----rinntnikgisavverkheahvypqighfftnip-----            | 409 |

: . :

---

|                                               |                                                             |     |
|-----------------------------------------------|-------------------------------------------------------------|-----|
| <i>Anopheles merus</i> ; XP_041782981.1       | -----eaddddaqvpek---ved-----eqvatt-----                     | 438 |
| <i>Anopheles arabiensis</i> ; XP_040172246.1  | -----eaddddaqvpek---vdd-----eqvatt-----                     | 438 |
| <i>Anopheles coluzzii</i> ; XP_040218532.1    | -----eaddddaqvpek---vdd-----eqvatt-----                     | 438 |
| <i>Anopheles darlingi</i> ; ETN65512.1        | espeqrpkrrksipkddvdkiekfvekleenkpvevsma-----                | 256 |
| <i>Aedes albopictus</i> ; XP_029723621.1      | dvpteepnieevesgdteevqaepivdepneqkpvdetkedivedanviksskessvdk | 444 |
| <i>Drosophila melanogaster</i> ; ABW09325.1   | dr-----kgllspdgdkdrdpplldlfer-----ghgivsdllkaldlkpqccyrn    | 465 |
| <i>Aedes aegypti</i> ; XP_021710788.1         | er-----kgllspdgdkdrdpplldliee-----ghqivtnlkslnlkaqncyrd     | 442 |
| <i>Culex quinquefasciatus</i> ; EDS38616.1    | er-----kgllspdgdkdrdpplldliee-----ghqivtnlkslnlkaqncyrd     | 294 |
| <i>Culex pipiens pallens</i> ; XP_039443854.1 | er-----kgllspdgdkdrdpplldliee-----ghqivtnlkslnlkaqncyrd     | 454 |

. : : :

|                                               |                                                              |     |
|-----------------------------------------------|--------------------------------------------------------------|-----|
| <i>Anopheles merus</i> ; XP_041782981.1       | -----arpslseapeaesdhipghvgsheseedkqqeattvadldaplttm          | 484 |
| <i>Anopheles arabiensis</i> ; XP_040172246.1  | -----arpslseapeaesdhipghvgsheseedkqqeattvadldaplttm          | 484 |
| <i>Anopheles coluzzii</i> ; XP_040218532.1    | -----arpslseapeaesdhipghvgsheseedkqqeattvadlnaplttm          | 484 |
| <i>Anopheles darlingi</i> ; ETN65512.1        | -----                                                        | 256 |
| <i>Aedes albopictus</i> ; XP_029723621.1      | vdeasaaddatkdgvksdaiedgaegqevpsn----kadsieevspkevneng-----   | 494 |
| <i>Drosophila melanogaster</i> ; ABW09325.1   | qepvn-lyhkvghgtldmyvispardskevkeflqwhagdqrlfaardsrdfnplqnl   | 524 |
| <i>Aedes aegypti</i> ; XP_021710788.1         | vepin-lyhkvghgtldmyiispakdskevkeflakwnaadpklfaprdskefvfpmqni | 501 |
| <i>Culex quinquefasciatus</i> ; EDS38616.1    | adpin-lyhkvghgtldmyvispakdskevkeflakwhaadpklfspkdskeftfpmqni | 353 |
| <i>Culex pipiens pallens</i> ; XP_039443854.1 | adpin-lyhkvghgtldmyvispakdskevkeflakwhaadpklfspkdskeftfpmqni | 513 |

---

|                                               |                                                             |     |
|-----------------------------------------------|-------------------------------------------------------------|-----|
| <i>Anopheles merus</i> ; XP_041782981.1       | r-----pavqstt-----vlaeqegtshadvdve                          | 509 |
| <i>Anopheles arabiensis</i> ; XP_040172246.1  | r-----pavqstt-----vlveqesttshadvdae                         | 509 |
| <i>Anopheles coluzzii</i> ; XP_040218532.1    | r-----pavqstt-----vlaeqesttshadvdae                         | 509 |
| <i>Anopheles darlingi</i> ; ETN65512.1        | -----                                                       | 256 |
| <i>Aedes albopictus</i> ; XP_029723621.1      | -sasplvkseskdnetvgvasspkqirsveddtngnpsgegpvdkaveevaees----- | 548 |
| <i>Drosophila melanogaster</i> ; ABW09325.1   | vsicallvwqpanpddtitri-----lfpgstpdfkiqegleklkhlefm          | 569 |
| <i>Aedes aegypti</i> ; XP_021710788.1         | isicallvwtpanpednitri-----lfpgsapeykileglekmknvefm          | 546 |
| <i>Culex quinquefasciatus</i> ; EDS38616.1    | isicallvwtpanpednitri-----lfpgsapeykileglekmksvefm          | 398 |
| <i>Culex pipiens pallens</i> ; XP_039443854.1 | isicallvwtpanpednitri-----lfpgsapeykileglekmksvefm          | 558 |
|                                               |                                                             |     |
| <i>Anopheles merus</i> ; XP_041782981.1       | ehdvt-----gttvaptkdeqapeadavpfeeeeadeapvttkpas              | 549 |
| <i>Anopheles arabiensis</i> ; XP_040172246.1  | ehdvt-----gttvaptideqapeadaapfeeeeadeapvttkpas              | 549 |
| <i>Anopheles coluzzii</i> ; XP_040218532.1    | ehdvt-----gttvaptkdeqapeadavsfeeeadeapvttkpas               | 549 |
| <i>Anopheles darlingi</i> ; ETN65512.1        | ----qkeaiqkssntftsqrkdiekdevpaalpktappdeapasgeneedli-----   | 304 |
| <i>Aedes albopictus</i> ; XP_029723621.1      | -spva-----vegpedeqadpseaqpenvngnesg-----                    | 577 |
| <i>Drosophila melanogaster</i> ; ABW09325.1   | khstctaksiapaiqvtstrkslksaieatp----appsasykt-----           | 610 |
| <i>Aedes aegypti</i> ; XP_021710788.1         | rqpvcvksiapslstqaltkkslksssidkiipepilpskstkp-----           | 591 |
| <i>Culex quinquefasciatus</i> ; EDS38616.1    | rhpvcvksiapsistqtftkkslksssidkiipepilpskatks-----           | 443 |
| <i>Culex pipiens pallens</i> ; XP_039443854.1 | rhpvcvksiapsistqtftkkslksssidkiipepilpskatks-----           | 603 |

:

|                                               |                                                              |     |
|-----------------------------------------------|--------------------------------------------------------------|-----|
| <i>Anopheles merus</i> ; XP_041782981.1       | deiaapeaeat-tv-srdetve-----qtmt--talpsqqvplasadekeneiddhhd   | 598 |
| <i>Anopheles arabiensis</i> ; XP_040172246.1  | deiaapeaeat-tv-srdetve-----qtmt--talpsqqvplasadekeneiddhhd   | 598 |
| <i>Anopheles coluzzii</i> ; XP_040218532.1    | deiaapeaeat-tv-srdetve-----qtmt--talpsqqvpltsadekeneiddhhd   | 598 |
| <i>Anopheles darlingi</i> ; ETN65512.1        | kyid-rtvsgnsglgsraeflmamledyndsvryegmqpieeplivpkkrksrhicddhd | 363 |
| <i>Aedes albopictus</i> ; XP_029723621.1      | gsldnppenga-----pvdnvpeevevsask-n-----                       | 604 |
| <i>Drosophila melanogaster</i> ; ABW09325.1   | tkf-spvasaa-----lavqhpqqqdnkakeaaaaa-----                    | 641 |
| <i>Aedes aegypti</i> ; XP_021710788.1         | sekdnkildnk-----mk-----midnkltds-ksstd-m-----                | 619 |
| <i>Culex quinquefasciatus</i> ; EDS38616.1    | lekdnrnidnk-----lk-----midnklvdsaksssd-i-----                | 472 |
| <i>Culex pipiens pallens</i> ; XP_039443854.1 | lekdnrnidnk-----lk-----midnklvdsaksssd-i-----                | 632 |
|                                               | .                                                            | ::  |
| <i>Anopheles merus</i> ; XP_041782981.1       | qtnaaehddgasadipeekeedeqveqeeqqaattpvvpvrda-----vpseqdqqt    | 652 |
| <i>Anopheles arabiensis</i> ; XP_040172246.1  | qtnavehddgasadipeekeedvqveqeeqqaavtppvvrde-----vpseqdqqt     | 652 |
| <i>Anopheles coluzzii</i> ; XP_040218532.1    | qtnavehddgasadipeekeedeqfeqeeqqaattpvvpvhde-----vpseqdqqt    | 652 |
| <i>Anopheles darlingi</i> ; ETN65512.1        | hlheklhahe---kgestkq-ekpa-aniilteasiev-aprkps---rdfs-----k   | 407 |
| <i>Aedes albopictus</i> ; XP_029723621.1      | -----peatksngksg-eatplksesveqidaqsa---gedip---ses            | 641 |
| <i>Drosophila melanogaster</i> ; ABW09325.1   | -----aaaaaasaataraka-----                                    | 658 |
| <i>Aedes aegypti</i> ; XP_021710788.1         | -----mdssadeak---lekhitkssvatvatakvtvsksviktssstes           | 661 |
| <i>Culex quinquefasciatus</i> ; EDS38616.1    | -----mdssadeak---lekqltkssvatvatakvmstvk-sksstest            | 513 |
| <i>Culex pipiens pallens</i> ; XP_039443854.1 | -----mdssadeak---lekqltkssvatvatakvmstvk-sksstest            | 673 |
|                                               | :                                                            | .   |

|                                               |                                                              |     |
|-----------------------------------------------|--------------------------------------------------------------|-----|
| <i>Anopheles merus</i> ; XP_041782981.1       | yqpseqevsapeqdrpavvstdkkepaqkaddepqvp-veqdfvelppavvvtelppvpt | 711 |
| <i>Anopheles arabiensis</i> ; XP_040172246.1  | yqpsepevsvpeqdrpavvstdkkepaqkaddepqmp-veqdfvelppavvvtelppvpt | 711 |
| <i>Anopheles coluzzii</i> ; XP_040218532.1    | yqpsepevsvpeqdrpavvsadkkepaqkaddepqvp-veqdfvelppavvvtelppvpt | 711 |
| <i>Anopheles darlingi</i> ; ETN65512.1        | ykpldke-----vg--kidqefdsdeepsssgaataavv-rpsr-----t           | 444 |
| <i>Aedes albopictus</i> ; XP_029723621.1      | aenvesn-----dap--gseataqpedgvqensngsgeekgkaskepsl-----       | 683 |
| <i>Drosophila melanogaster</i> ; ABW09325.1   | ----dsm-----dtda--epeheadpepadtgdeaapteqepea-----            | 691 |
| <i>Aedes aegypti</i> ; XP_021710788.1         | tkkidsm-----liesskkidldekkdssdagsdkdetekkvaa-----            | 700 |
| <i>Culex quinquefasciatus</i> ; EDS38616.1    | tkkvdnk-----lietkkieseeekdsasdagsekdetekkast-----            | 552 |
| <i>Culex pipiens pallens</i> ; XP_039443854.1 | tkkvdnk-----lietkkieseeekdsasdagsekdetekkast-----            | 712 |
| :                                             |                                                              |     |
| <i>Anopheles merus</i> ; XP_041782981.1       | tsdepstteqtpeppkdeilpn-----pleadshvlsds-----mt               | 748 |
| <i>Anopheles arabiensis</i> ; XP_040172246.1  | tsdepstteqtpeppkdeilpn-----pleadshilsds-----mt               | 748 |
| <i>Anopheles coluzzii</i> ; XP_040218532.1    | tsdepstteqtpeppkdeilpn-----pleadshvlsds-----mt               | 748 |
| <i>Anopheles darlingi</i> ; ETN65512.1        | kqakskqrenlpsspapp---kfqkslse-----slfd-----                  | 474 |
| <i>Aedes albopictus</i> ; XP_029723621.1      | -----d-kpes-----ekgesadepkssg-----saaasrepsvdkve             | 715 |
| <i>Drosophila melanogaster</i> ; ABW09325.1   | -----etepepehep-eaeqdkdvgeekkevlimkpqqatpaviaasgkdgvdaas     | 742 |
| <i>Aedes aegypti</i> ; XP_021710788.1         | -----e-eaipeklvqdkddakdkkdsitikedtk-----                     | 734 |
| <i>Culex quinquefasciatus</i> ; EDS38616.1    | -----e-eae-----kkpeedkkedtaiikeetk-----                      | 575 |
| <i>Culex pipiens pallens</i> ; XP_039443854.1 | -----e-eae-----kkpeedkkedtaiikeetk-----                      | 735 |
| :                                             |                                                              |     |

---

|                                               |                                                            |     |
|-----------------------------------------------|------------------------------------------------------------|-----|
| <i>Anopheles merus</i> ; XP_041782981.1       | tehaptfgdr-----keddgqeqeqhvpqggadldep----vemntiipleaedqkv  | 797 |
| <i>Anopheles arabiensis</i> ; XP_040172246.1  | tehaptfgdr-----keddaqegeqhpvqggadldep----vemntiipldaeedqkv | 797 |
| <i>Anopheles coluzzii</i> ; XP_040218532.1    | tehaptfgdr-----keddaqegeqhpvqggadldep----vemntiipldaeedqkv | 797 |
| <i>Anopheles darlingi</i> ; ETN65512.1        | -----rqsreststpvksvddtpkahtprmlkriismpvteh---              | 513 |
| <i>Aedes albopictus</i> ; XP_029723621.1      | s-----ekegsadepkssgsakas----nep-----sldkpesek---           | 746 |
| <i>Drosophila melanogaster</i> ; ABW09325.1   | adatp-tgklskasakgkadmpraevpvrsridtkpp----ksmdrklakrdekk--- | 794 |
| <i>Aedes aegypti</i> ; XP_021710788.1         | -----vakritekssrpstarsridtkpp----kmaakpmkkkeean---         | 772 |
| <i>Culex quinquefasciatus</i> ; EDS38616.1    | -----stkkigdrvsrpatarsrvdtkpp----kpttkikkkdett---          | 613 |
| <i>Culex pipiens pallens</i> ; XP_039443854.1 | -----ttkkigdrvgrpatarsrvdtkpp----kpttkikkkdett---          | 773 |

: . :

|                                               |                                                              |     |
|-----------------------------------------------|--------------------------------------------------------------|-----|
| <i>Anopheles merus</i> ; XP_041782981.1       | ehskeedqkvdeqdeqeqqvqehaqdvvpdthadddeqaqsgeepvtpvsvdaqpepa   | 857 |
| <i>Anopheles arabiensis</i> ; XP_040172246.1  | ehpkeedqkvdeqdeqdeqvqeqaqdvvpdthadaddqaqsgeepdvtpvsddaqppepa | 857 |
| <i>Anopheles coluzzii</i> ; XP_040218532.1    | ehpkeedqkideqdeqdeqvqeqaqdvvpdthaddddqpqsgeevvtpvsddaqppepa  | 857 |
| <i>Anopheles darlingi</i> ; ETN65512.1        | -----lnadarpetpqrpaltsksssssfst--                            | 539 |
| <i>Aedes albopictus</i> ; XP_029723621.1      | -----ngsqeepks-dkpesekdvsadepkns-                            | 772 |
| <i>Drosophila melanogaster</i> ; ABW09325.1   | -----sspttppaar-apvaqna-----                                 | 811 |
| <i>Aedes aegypti</i> ; XP_021710788.1         | -----ksspttpkksvepkltngiskdeeskk-                            | 799 |
| <i>Culex quinquefasciatus</i> ; EDS38616.1    | -----ksspttpkktapeklngvskdddakk-                             | 640 |
| <i>Culex pipiens pallens</i> ; XP_039443854.1 | -----ksspttpkktapeklngvskdedakk-                             | 800 |

. .



---

|                                               |                                                            |     |
|-----------------------------------------------|------------------------------------------------------------|-----|
| <i>Anopheles merus</i> ; XP_041782981.1       | apvdeklgeddeqqsvhespdqlfpesipg-----egdclid-----gvtyen--    | 900 |
| <i>Anopheles arabiensis</i> ; XP_040172246.1  | apve-kvgeddeqqtvhespdqlfpesipg-----egdclid-----gvtyen--    | 899 |
| <i>Anopheles coluzzii</i> ; XP_040218532.1    | apve-kvgeddeqqtvhespdqlfpesipg-----egdclid-----gvtyen--    | 899 |
| <i>Anopheles darlingi</i> ; ETN65512.1        | -----vdlqrsricverfspedyahhgggadelvqpsklitrkiswksle         | 585 |
| <i>Aedes albopictus</i> ; XP_029723621.1      | -----gsa----qaskepsldkpskesvdepksggsak-----                | 801 |
| <i>Drosophila melanogaster</i> ; ABW09325.1   | -----kpkvlrpatksspsstpaksakeannrkvl-eskq-----              | 846 |
| <i>Aedes aegypti</i> ; XP_021710788.1         | ----tappkttkpvtrpgkaspkstpaksakdannrkvl-earq-----          | 840 |
| <i>Culex quinquefasciatus</i> ; EDS38616.1    | ----atgppkttkpastkpgkaspkstpaksakdannrkvl-earq-----        | 681 |
| <i>Culex pipiens pallens</i> ; XP_039443854.1 | ----atgppkttkpastkpgkaspkstpaksakdannrkvl-earq-----        | 841 |
| .                                             |                                                            |     |
| <i>Anopheles merus</i> ; XP_041782981.1       | -----gasvpa-----sgkcqvachcsnsiv--hcmvrceaapsadctpkstl      | 942 |
| <i>Anopheles arabiensis</i> ; XP_040172246.1  | -----gasvpa-----sgkcqvachcsnsiv--hcmvrceaapsadctpkstl      | 941 |
| <i>Anopheles coluzzii</i> ; XP_040218532.1    | -----gasvpa-----sgkcqvachcsnsiv--hcmvrceaapsadctpkstl      | 941 |
| <i>Anopheles darlingi</i> ; ETN65512.1        | tpatnrtpptqdtat-npcftigdaavassgntlqppevpk-rkrsttstemetiger | 643 |
| <i>Aedes albopictus</i> ; XP_029723621.1      | -----sskepsldk----peseknm----sadevksggsaksskdpsldk         | 838 |
| <i>Drosophila melanogaster</i> ; ABW09325.1   | q-----aarvqatstvsrrvts----taservvqqaeaktaatgatqatqrkpsirr  | 895 |
| <i>Aedes aegypti</i> ; XP_021710788.1         | r-----paakpapakd-----smekkdspkverkpisrr                    | 871 |
| <i>Culex quinquefasciatus</i> ; EDS38616.1    | r-----papakaa-akke-----paekkeappkverkpisrr                 | 711 |
| <i>Culex pipiens pallens</i> ; XP_039443854.1 | r-----papakaa-akke-----paekkeappkverkpisrr                 | 871 |
| .                                             |                                                            |     |

|                                               |                                                              |      |
|-----------------------------------------------|--------------------------------------------------------------|------|
| <i>Anopheles merus</i> ; XP_041782981.1       | pge-----ccpsys-----c---pkeasttvs---sasvesteastesdae          | 977  |
| <i>Anopheles arabiensis</i> ; XP_040172246.1  | pge-----ccpsys-----c---pkeasttvs---sasvesteastesdae          | 976  |
| <i>Anopheles coluzzii</i> ; XP_040218532.1    | pge-----ccpsys-----c---pkeasttvs---sasvesteastesdae          | 976  |
| <i>Anopheles darlingi</i> ; ETN65512.1        | pdastpaepscipaaqheepadsalrkfclgsfiessnvlqhhdvsvs---ldrvysas  | 699  |
| <i>Aedes albopictus</i> ; XP_029723621.1      | pksennes-----aiepkssgsa-ka-----skepsqdnpsdkngnmd             | 876  |
| <i>Drosophila melanogaster</i> ; ABW09325.1   | prgvpsk-----ra-p-apgspvkqak---pkaadlktrldkngttdd             | 934  |
| <i>Aedes aegypti</i> ; XP_021710788.1         | prgpts-----at-a-vggspvkakvklsekdavirkakldkngttdd             | 912  |
| <i>Culex quinquefasciatus</i> ; EDS38616.1    | pkgpas-----aa-a-vggspvkakvklsekdavirkakldkngttdd             | 752  |
| <i>Culex pipiens pallens</i> ; XP_039443854.1 | pkgpas-----aa-a-vggspvkakvklsekdavirkakldkngttdd             | 912  |
|                                               | * :                                                          | .    |
| <i>Anopheles merus</i> ; XP_041782981.1       | se-----eeqvsadv---asds gas----dvesaeattkapa-sds              | 1011 |
| <i>Anopheles arabiensis</i> ; XP_040172246.1  | se-----eeqvsadv---asds gas----nvesaeattkapa-sds              | 1010 |
| <i>Anopheles coluzzii</i> ; XP_040218532.1    | se-----eeqvsadv---asds gas----nvesaeattkapa-sds              | 1010 |
| <i>Anopheles darlingi</i> ; ETN65512.1        | dnken--iieqfqtflen---qinaelndpnptnnpnvakllekl---srtstasgg--- | 747  |
| <i>Aedes albopictus</i> ; XP_029723621.1      | epkangsakasqetsldkpnsekddgsveepkssgsakaskepsleqaepdlksdgsakv | 936  |
| <i>Drosophila melanogaster</i> ; ABW09325.1   | ss-----lvstpsadeataakklq-----dl                              | 955  |
| <i>Aedes aegypti</i> ; XP_021710788.1         | ss-----lvstpsadeagiavqkriid----ttas----aa                    | 940  |
| <i>Culex quinquefasciatus</i> ; EDS38616.1    | ss-----lvstpsadeagvavqkrivd----svtlagtssa                    | 784  |
| <i>Culex pipiens pallens</i> ; XP_039443854.1 | ss-----lvstpsadeagvavqkrivd----svtlagtssa                    | 944  |
|                                               | .                                                            | .. : |

---

|                                               |                                                           |      |
|-----------------------------------------------|-----------------------------------------------------------|------|
| <i>Anopheles merus</i> ; XP_041782981.1       | qslstdeeddddvsdkp---seaesdsagvlddevfkpyrptepshget-----h   | 1059 |
| <i>Anopheles arabiensis</i> ; XP_040172246.1  | qslstdeeddddvsdkp---seaesdsagadlddevfkpyrptepshget-----h  | 1058 |
| <i>Anopheles coluzzii</i> ; XP_040218532.1    | qslstdeeddddvsdkp---seaesdsagadlddevfkpyrptepshget-----h  | 1058 |
| <i>Anopheles darlingi</i> ; ETN65512.1        | -----sdledvkiel--vgssassnnasdvddcdfpefekiekfeivgdlpkidipp | 798  |
| <i>Aedes albopictus</i> ; XP_029723621.1      | psldkteseldqsgndqskessakesagesgsveavtapdeggsadagemsm----- | 988  |
| <i>Drosophila melanogaster</i> ; ABW09325.1   | t---asqeldaekqre--lddlkeegevveieavfsrdemkrqqhqqika-----   | 1001 |
| <i>Aedes aegypti</i> ; XP_021710788.1         | a---gtsdmdaiqqqq--laelkeeqeavreieavfkrdsekikrheil-s-----  | 985  |
| <i>Culex quinquefasciatus</i> ; EDS38616.1    | a---sstdidpiqqqq--laelkeeqeavreieavfnkg--kvtrrevl-s-----  | 827  |
| <i>Culex pipiens pallens</i> ; XP_039443854.1 | a---sstdidpiqqqq--laelkeeqeavreieavfnkg--kvtrrevl-s-----  | 987  |

:: .            ...            :

|                                               |                                                             |      |
|-----------------------------------------------|-------------------------------------------------------------|------|
| <i>Anopheles merus</i> ; XP_041782981.1       | inffagnrpttadyhdeiilstaaptkvpvvsaqdddvaqedpvkmeq----peqdaap | 1115 |
| <i>Anopheles arabiensis</i> ; XP_040172246.1  | inffagnrpttadyhdeiilstavskvpvvstqdddvaqedpvkmeq----peqdaap  | 1114 |
| <i>Anopheles coluzzii</i> ; XP_040218532.1    | inffagnrpttadyhdeiilstaaptkvpvvsqdddvaqedpvkmeq----peqdaap  | 1114 |
| <i>Anopheles darlingi</i> ; ETN65512.1        | khaysgkrrdsieymsdwfgdsdstteekasg----gvknkpavgakgkrrsiedvgs  | 854  |
| <i>Aedes albopictus</i> ; XP_029723621.1      | -----                                                       | 988  |
| <i>Drosophila melanogaster</i> ; ABW09325.1   | -----elre-----                                              | 1005 |
| <i>Aedes aegypti</i> ; XP_021710788.1         | -----ehr-----                                               | 988  |
| <i>Culex quinquefasciatus</i> ; EDS38616.1    | -----ehr-----                                               | 830  |
| <i>Culex pipiens pallens</i> ; XP_039443854.1 | -----ehr-----                                               | 990  |

|                                               |                                                               |      |
|-----------------------------------------------|---------------------------------------------------------------|------|
| <i>Anopheles merus</i> ; XP_041782981.1       | attqasvte---salqeegtltltaergtesdesvaaeqdeqeqatttkfteet---g    | 1168 |
| <i>Anopheles arabiensis</i> ; XP_040172246.1  | attqasvte---salqeegtltltaergpesdesvaaeqdeqeqvttaktfaeet---g   | 1167 |
| <i>Anopheles coluzzii</i> ; XP_040218532.1    | attqasvte---salqeegtltltaergpesdesvaaeqddqeevttaktfaeet---g   | 1167 |
| <i>Anopheles darlingi</i> ; ETN65512.1        | wfsnhnmlrpsfgqefeeprsrlrrgs-----dgflgydm--nrqypfgkvrersesqsa  | 907  |
| <i>Aedes albopictus</i> ; XP_029723621.1      | -----ssrmgddeqepes-----e-----a-----vdepsa--pp                 | 1011 |
| <i>Drosophila melanogaster</i> ; ABW09325.1   | -----mpaegtgdgenepde-----e-----eeyliiekeeveqytedsiveqes--sm   | 1047 |
| <i>Aedes aegypti</i> ; XP_021710788.1         | -----eiqdsttepee-----e-----eeyliieke--eqytedsinepes--sa       | 1024 |
| <i>Culex quinquefasciatus</i> ; EDS38616.1    | -----eiqdsttepee-----e-----deyliieke--eqytedsinepes--sa       | 866  |
| <i>Culex pipiens pallens</i> ; XP_039443854.1 | -----eiqdsttepee-----e-----deyliieke--eqytedsinepes--sa       | 1026 |
| . * .                                         |                                                               |      |
| <i>Anopheles merus</i> ; XP_041782981.1       | ttlasvkteedse---a-----edkdakped-----ttsgvetdq                 | 1201 |
| <i>Anopheles arabiensis</i> ; XP_040172246.1  | ttlasvkteedsv---veeg-----qrgddakped-----ttsgvetdq             | 1205 |
| <i>Anopheles coluzzii</i> ; XP_040218532.1    | ttlasvkteedsv---veeg-----qrgeddakped-----ttsgvetdq            | 1205 |
| <i>Anopheles darlingi</i> ; ETN65512.1        | emfeditkhqetpgdkegth--sler-----                               | 931  |
| <i>Aedes albopictus</i> ; XP_029723621.1      | medeetget---ggedkvksdel---kteddsakndg---ngeettadqvnqgddeet    | 1060 |
| <i>Drosophila melanogaster</i> ; ABW09325.1   | tkeeeiqkhqrdsqesekkrkksaeeeeieaa--iakvea-----aerkarlegasarq   | 1098 |
| <i>Aedes aegypti</i> ; XP_021710788.1         | tkeeeiqkhqrdsqesekckrdsmegekqekadvvgkmeg-----etatvveiiegdkvde | 1079 |
| <i>Culex quinquefasciatus</i> ; EDS38616.1    | tkeeeiqkhqrdsqesekrkresledekeekadvvgktdeaadgaaaavveliegekdea  | 926  |
| <i>Culex pipiens pallens</i> ; XP_039443854.1 | tkeeeiqkhqrdsqesekrkresledekeekadvvgktdeaadgaaaavveliegekdea  | 1086 |

. :

|                                               |                                                              |      |
|-----------------------------------------------|--------------------------------------------------------------|------|
| <i>Anopheles merus</i> ; XP_041782981.1       | qd-----krvtvtadeveddkeqat-----tastissd-----kqqevskad         | 1239 |
| <i>Anopheles arabiensis</i> ; XP_040172246.1  | qd-----krvttvadevendkdqat-----tvstissd-----kqqevskad         | 1243 |
| <i>Anopheles coluzzii</i> ; XP_040218532.1    | qd-----krvttvadeveddkeqat-----tvstissd-----kqqevskad         | 1243 |
| <i>Anopheles darlingi</i> ; ETN65512.1        | -----kglsralpiherkvlehnssdallmkvlnre                         | 963  |
| <i>Aedes albopictus</i> ; XP_029723621.1      | de-----skeevveepciq-----rqvpsaskipskqps-v-elddikkvd          | 1100 |
| <i>Drosophila melanogaster</i> ; ABW09325.1   | de-----seldvepeqskik-----a-evqdiiaa                          | 1123 |
| <i>Aedes aegypti</i> ; XP_021710788.1         | ehpaeethqedketilekeaiedvkeepkdteklshkqdie-----e-evqdiiasa    | 1132 |
| <i>Culex quinquefasciatus</i> ; EDS38616.1    | eeeep--kpedke---seeekvdaeeskepekmspkhkhle-----e-evqeiiasa    | 973  |
| <i>Culex pipiens pallens</i> ; XP_039443854.1 | eeeep--kpevke---seeekvdaeeskepekmspkhkhle-----e-evqeiiasa    | 1133 |
|                                               | :                                                            | ::   |
| <i>Anopheles merus</i> ; XP_041782981.1       | -dgytsssvted-----tavsveqdekleqpapttartveadeetv-v-----        | 1281 |
| <i>Anopheles arabiensis</i> ; XP_040172246.1  | -dgytsssvaad-----tpvsveqdekleqpapttvrtveadeeaa-v-----        | 1285 |
| <i>Anopheles coluzzii</i> ; XP_040218532.1    | -devtsssvaad-----tpvsveqdekleqpapttvrtveadedta-v-----        | 1285 |
| <i>Anopheles darlingi</i> ; ETN65512.1        | -hrishssahssaeklnne-----skpqemask-----stdptdeee----qkp       | 1003 |
| <i>Aedes albopictus</i> ; XP_029723621.1      | lasfnkdsaealfytlkkselenqesqatkpeakven----gveeneddddvvtepp    | 1156 |
| <i>Drosophila melanogaster</i> ; ABW09325.1   | -kdiaksrteeqlakpae-----elssptpeeklsk-----ktsdtkddqi----gap   | 1167 |
| <i>Aedes aegypti</i> ; XP_021710788.1         | -keiakskmetsmdglkte-----emssispdekvs----tkktsdtrdene----pep  | 1178 |
| <i>Culex quinquefasciatus</i> ; EDS38616.1    | -keiakskmetsmdglkte-----emssispddkiss----tkktsdtrdene----pep | 1019 |
| <i>Culex pipiens pallens</i> ; XP_039443854.1 | -keiakskmetsmdglkte-----emssispddkiss----tkktsdtrdene----pep | 1179 |
|                                               | : .. : ::                                                    |      |

---

|                                               |                                                             |      |
|-----------------------------------------------|-------------------------------------------------------------|------|
| <i>Anopheles merus</i> ; XP_041782981.1       | --eqeqdqpqssddqaeeddepssttvha-----dkpsaveedeegpaqeattaraie  | 1332 |
| <i>Anopheles arabiensis</i> ; XP_040172246.1  | --aqeqdqpqssddqaeeddepssttvra-----dkpssveedeegpaqeatttrate  | 1336 |
| <i>Anopheles coluzzii</i> ; XP_040218532.1    | --aqeqdqpqssddqaeeddepssttvra-----dkpssveqdeegpaqeattarvte  | 1336 |
| <i>Anopheles darlingi</i> ; ETN65512.1        | l-----lsstseasvva---aeisne-----sakqssnkdsveplqaanehstll     | 1045 |
| <i>Aedes albopictus</i> ; XP_029723621.1      | srsvrv-spkrstfndflesspitdevskaegdgvadqdgveedenqqfnpmfa----- | 1210 |
| <i>Drosophila melanogaster</i> ; ABW09325.1   | vdlpv-nlqeslpe-----ekfsatiesga-ttaptlpederipldqikedlvie     | 1216 |
| <i>Aedes aegypti</i> ; XP_021710788.1         | vqkehieppheshhe-----ervsataesgattaptlpederipldeikedlvie     | 1229 |
| <i>Culex quinquefasciatus</i> ; EDS38616.1    | vvkghieppheshhe-----ervsatgesgattaptlpederipldeikedlvie     | 1070 |
| <i>Culex pipiens pallens</i> ; XP_039443854.1 | vvkghieppheshhe-----ervsatgesgattaptlpederipldeikedlvie     | 1230 |

\* : . :\*. :

|                                               |                                                             |      |
|-----------------------------------------------|-------------------------------------------------------------|------|
| <i>Anopheles merus</i> ; XP_041782981.1       | tateqqesvpeietkrktiqtvtvap-ttvseq-----qddlektetttqpaa-saaaa | 1383 |
| <i>Anopheles arabiensis</i> ; XP_040172246.1  | tateqqesvteietkrktiqtvtvap-ttvseq-----qddlektetttqpaa-saaaa | 1387 |
| <i>Anopheles coluzzii</i> ; XP_040218532.1    | tateqqesvtefetkrktiqtvtvap-ttvseq-----qddlektetttqpaa-saaaa | 1387 |
| <i>Anopheles darlingi</i> ; ETN65512.1        | -----                                                       | 1045 |
| <i>Aedes albopictus</i> ; XP_029723621.1      | -----asvrnkq----l-qdqlhsrfsqdd---tskl dn                    | 1236 |
| <i>Drosophila melanogaster</i> ; ABW09325.1   | ekyv-----keetkeaeaivvatvqtlpeaaplaidtilasatkdapkdanaeal     | 1266 |
| <i>Aedes aegypti</i> ; XP_021710788.1         | ekyv-----keetkevevappl-----                                 | 1246 |
| <i>Culex quinquefasciatus</i> ; EDS38616.1    | ekhv-----keetkevevapp-----                                  | 1087 |
| <i>Culex pipiens pallens</i> ; XP_039443854.1 | ekhv-----keetkevevapp-----                                  | 1247 |

---

|                                               |                                                                |      |
|-----------------------------------------------|----------------------------------------------------------------|------|
| <i>Anopheles merus</i> ; XP_041782981.1       | delqee----ehееkltdepeltdedvqesaapttsrptaqeeastqydhepetthkss    | 1439 |
| <i>Anopheles arabiensis</i> ; XP_040172246.1  | delqee----ehееvkltdpeltdednaqesaaattsrptvqeeastqydhepetthkps   | 1443 |
| <i>Anopheles coluzzii</i> ; XP_040218532.1    | delqee----ehqevkltdpeltdeddaqesaaattsrptgqeeastqydhvpdsthkps   | 1443 |
| <i>Anopheles darlingi</i> ; ETN65512.1        | -----kflskerlie-----                                           | 1055 |
| <i>Aedes albopictus</i> ; XP_029723621.1      | strraamhrsmtermldlarqdtynyvd-lrkydpd----yveeedqfdgyyignlk----- | 1286 |
| <i>Drosophila melanogaster</i> ; ABW09325.1   | gelpdsgervlpmkmtfeaaqqnlrd-viktpdevadlpvheeadlglyekdsqdagaks   | 1325 |
| <i>Aedes aegypti</i> ; XP_021710788.1         | ptvyepplerptpakmhfsaaqqahmrd-vvktpdevadlpmhheadfeeysenkdkdeke  | 1305 |
| <i>Culex quinquefasciatus</i> ; EDS38616.1    | ptvyepplerptpakmhfnaaqqphmrd-vvktpdevadlpvheeadfeeygedkdkddeke | 1146 |
| <i>Culex pipiens pallens</i> ; XP_039443854.1 | ptvyepplerptpakmhfnaaqqphmrd-vvktpdevadlpvheeadfeeygedkdkddeke | 1306 |

: :

|                                               |                                                             |      |
|-----------------------------------------------|-------------------------------------------------------------|------|
| <i>Anopheles merus</i> ; XP_041782981.1       | evhddeqpghtvssvtsekesdvpvavtvqaameqeddgdvsktteapaaqsttasnav | 1499 |
| <i>Anopheles arabiensis</i> ; XP_040172246.1  | eahddeqpghtvssvtsekesdvpvavtvqtameqevdedvskateaaaahsttasnav | 1503 |
| <i>Anopheles coluzzii</i> ; XP_040218532.1    | eahddeqpghtvssvtsekesdvpvavtvqaameqeddedvsktteataahsttasnav | 1503 |
| <i>Anopheles darlingi</i> ; ETN65512.1        | -----                                                       | 1055 |
| <i>Aedes albopictus</i> ; XP_029723621.1      | --h---kil---assvsadsdy-----ydqeq--aeg-----                  | 1309 |
| <i>Drosophila melanogaster</i> ; ABW09325.1   | ishk-eesa---ke-----eketddekenkvgeie-----lg--depnk           | 1359 |
| <i>Aedes aegypti</i> ; XP_021710788.1         | rdtk-ekpe---avd-----saqkketevkepektkvi-----vdksaesdkl       | 1345 |
| <i>Culex quinquefasciatus</i> ; EDS38616.1    | rdtk-ekpv---tattaaesaapaakketeekqpektektv-----tdksaesdkl    | 1194 |
| <i>Culex pipiens pallens</i> ; XP_039443854.1 | rdtk-ekpv---tattaaesaapaakketeekqpektektv-----tdksaesdkl    | 1354 |

---

|                                               |                                                               |      |
|-----------------------------------------------|---------------------------------------------------------------|------|
| <i>Anopheles merus</i> ; XP_041782981.1       | ddaiiyrvdeeednkpivkptleeevstshavqpthdevkpvedaakpqavdaqet----  | 1555 |
| <i>Anopheles arabiensis</i> ; XP_040172246.1  | ddaiiyrvdeeednkpivkptleeevstshavqpthdevkpvedaakpqavdaqet----  | 1559 |
| <i>Anopheles coluzzii</i> ; XP_040218532.1    | ddaiiyrvdeeednkpivkptleeevstshavqpthdevkpvedaakpqavdaqet----  | 1559 |
| <i>Anopheles darlingi</i> ; ETN65512.1        | -----                                                         | 1055 |
| <i>Aedes albopictus</i> ; XP_029723621.1      | ----smd-----dnnvqtaletiastd-----test-lpsqttiqaanrgflkrgsqnt   | 1352 |
| <i>Drosophila melanogaster</i> ; ABW09325.1   | dishvll-----kesvqevaekvvie-----ttve-kkqeeiveattvitqen----     | 1402 |
| <i>Aedes aegypti</i> ; XP_021710788.1         | cdtvkdi-----kqevqeviekvai-d-----tmve-kpp--kldtqqpsa-kd----    | 1384 |
| <i>Culex quinquefasciatus</i> ; EDS38616.1    | cdtvkda-----qevqeviekiek-d-----tkve-kpp--klepqtspacea----     | 1233 |
| <i>Culex pipiens pallens</i> ; XP_039443854.1 | cdtvkda-----qevqeviekiek-d-----tkve-kpp--klepqtspacea----     | 1393 |
|                                               |                                                               |      |
| <i>Anopheles merus</i> ; XP_041782981.1       | dddnlispvggepehdggfhfpqeddeequeepifkptlddteqhaavplpaeip-----q | 1610 |
| <i>Anopheles arabiensis</i> ; XP_040172246.1  | dddnlispvggepeqdggfhfpqeddeequeepifkptlddteqhaavplpaeip-----q | 1614 |
| <i>Anopheles coluzzii</i> ; XP_040218532.1    | dddnlispvggepeqdggfhfpqeddeequeepifkptlddteqhaavplpaeip-----q | 1614 |
| <i>Anopheles darlingi</i> ; ETN65512.1        | -----                                                         | 1055 |
| <i>Aedes albopictus</i> ; XP_029723621.1      | ssnipyasfgnnainqslldfiere-----eq-----mkeaeaqaastiqrSYRRftrnk  | 1402 |
| <i>Drosophila melanogaster</i> ; ABW09325.1   | -----qedlmeqvk-----dk                                         | 1413 |
| <i>Aedes aegypti</i> ; XP_021710788.1         | -----qhde-----                                                | 1388 |
| <i>Culex quinquefasciatus</i> ; EDS38616.1    | -----avde-----                                                | 1237 |
| <i>Culex pipiens pallens</i> ; XP_039443854.1 | -----avde-----                                                | 1397 |



---

|                                               |                                                              |      |
|-----------------------------------------------|--------------------------------------------------------------|------|
| <i>Anopheles merus</i> ; XP_041782981.1       | etvplepvdqi-keqedaegrttpraeqetmapitskpelpeqere---rvtpairdde  | 1665 |
| <i>Anopheles arabiensis</i> ; XP_040172246.1  | etvplepvdqi-keqedaeggttpraeqetmapstskpelpeqere---rvtpairdde  | 1669 |
| <i>Anopheles coluzzii</i> ; XP_040218532.1    | etvplepvdqi-keqedaeggttpraeqetmapstskpelpeqere---rvtpairdde  | 1669 |
| <i>Anopheles darlingi</i> ; ETN65512.1        | -----                                                        | 1055 |
| <i>Aedes albopictus</i> ; XP_029723621.1      | kkllrdyhstmqfted-----qstesledypssviqikldrqpkeesdns           | 1448 |
| <i>Drosophila melanogaster</i> ; ABW09325.1   | eeheqkiesgiitekeakksastpee--ketsditsddelpaqladp---ttvppksakd | 1468 |
| <i>Aedes aegypti</i> ; XP_021710788.1         | advlkdlesqiisse-----pei--kkqpetk-----qleqt---peqppvadd       | 1428 |
| <i>Culex quinquefasciatus</i> ; EDS38616.1    | aavlkdesqiiske-----pev--kaektva-----stvaa---p-vegleddd       | 1276 |
| <i>Culex pipiens pallens</i> ; XP_039443854.1 | aavlkdesqiiske-----pev--kaektva-----stvaa---p-vegleddd       | 1436 |
|                                               |                                                              |      |
| <i>Anopheles merus</i> ; XP_041782981.1       | qedneieadiqsvavpekkpesvpmydeieeteqqt-vaptkqepvpttvaqeqese--- | 1721 |
| <i>Anopheles arabiensis</i> ; XP_040172246.1  | qedneieadiqpavpekkpevpmydeieeteqqt-vaptkqepvpttvaqeqese---   | 1725 |
| <i>Anopheles coluzzii</i> ; XP_040218532.1    | qkdneieadiqpavpekkpevpmydeieeteqqt-vaptkqepvpttvaqeqesk---   | 1725 |
| <i>Anopheles darlingi</i> ; ETN65512.1        | -----                                                        | 1055 |
| <i>Aedes albopictus</i> ; XP_029723621.1      | fedarse-----nrrrpmyslnidey----dtaarr-----mtl--trgvam         | 1484 |
| <i>Drosophila melanogaster</i> ; ABW09325.1   | redtgsi-----es-pptieeiaevqakqeaqkvpapeeaiktekspas            | 1515 |
| <i>Aedes aegypti</i> ; XP_021710788.1         | eedkksv-----he-----evivakkvepkvpvpetsildeiwigapq             | 1465 |
| <i>Culex quinquefasciatus</i> ; EDS38616.1    | eddkksv-----he-----evivptkvdpkvpap--svldeiwaapd              | 1311 |
| <i>Culex pipiens pallens</i> ; XP_039443854.1 | eddkksv-----he-----evivptkvdpkvpap--svldeiwaapd              | 1471 |

---

|                                               |                                                          |      |
|-----------------------------------------------|----------------------------------------------------------|------|
| <i>Anopheles merus</i> ; XP_041782981.1       | ---vqpttetagkdevspv--eqdkpeadiepeqpapvt--qsspvd-----ttpa | 1765 |
| <i>Anopheles arabiensis</i> ; XP_040172246.1  | ---vqptteaagtdevspv--eqdkpeadsepeqpapvt--qsspvd-----ttpa | 1769 |
| <i>Anopheles coluzzii</i> ; XP_040218532.1    | ---vqptteaagndevspv--eqdkpeadsepeqpapvt--qsspvd-----ttpa | 1769 |
| <i>Anopheles darlingi</i> ; ETN65512.1        | -----                                                    | 1055 |
| <i>Aedes albopictus</i> ; XP_029723621.1      | qrnstpeedsgksdnasgekksasepasnlaitegtprtssdlsee-----kkss  | 1535 |
| <i>Drosophila melanogaster</i> ; ABW09325.1   | ketsrpesatgsvk-----edteqtskksppvpsrpeseakdkksp           | 1556 |
| <i>Aedes aegypti</i> ; XP_021710788.1         | kaeekleelkqiid-----dkakettsdlvav-----kde                 | 1495 |
| <i>Culex quinquefasciatus</i> ; EDS38616.1    | kaeekleelkqiid-----geakkttselvai-----kde                 | 1341 |
| <i>Culex pipiens pallens</i> ; XP_039443854.1 | kaeekleelkqiid-----geakkttselvai-----kde                 | 1501 |

|                                               |                                                              |      |
|-----------------------------------------------|--------------------------------------------------------------|------|
| <i>Anopheles merus</i> ; XP_041782981.1       | mvqdieqeqdeqehdtepeqvhsddihsttvrva-----aadsaed-----eehdeehl  | 1814 |
| <i>Anopheles arabiensis</i> ; XP_040172246.1  | ivqdieqeqdeqehgtepeqvhsddihsttvrva-----vadsaed-----eehgeehl  | 1818 |
| <i>Anopheles coluzzii</i> ; XP_040218532.1    | ivqdieqeqdeqehdtepeqvhsddihsttvrva-----vadsaed-----eehdeehl  | 1818 |
| <i>Anopheles darlingi</i> ; ETN65512.1        | -----                                                        | 1055 |
| <i>Aedes albopictus</i> ; XP_029723621.1      | tssdekenkdns--sskssgggkdsa-ces-----astln---                  | 1567 |
| <i>Drosophila melanogaster</i> ; ABW09325.1   | fasgeasrpesvaesvkdeagkaesr-resiakthkdessldkakeqes--rreslaesi | 1613 |
| <i>Aedes aegypti</i> ; XP_021710788.1         | mfkelvdrkeevmdkvkqeiidtdkkaketva-----elakaaenvtvqaaevakei    | 1548 |
| <i>Culex quinquefasciatus</i> ; EDS38616.1    | mvkeiverkeevdvkaevadvdqkitetvt-----elgksvdq----aagellegl     | 1390 |
| <i>Culex pipiens pallens</i> ; XP_039443854.1 | mvkeiverkeevdvkaevadvdqkitetvt-----elgksvdq----aagellegl     | 1550 |

|                                               |                                                              |      |
|-----------------------------------------------|--------------------------------------------------------------|------|
| <i>Anopheles merus</i> ; XP_041782981.1       | ittpaavqaeqdekqqt-t-----paiassdsevtaveeeqsevqh----           | 1854 |
| <i>Anopheles arabiensis</i> ; XP_040172246.1  | nttpaavqaeqdekeqt-t-----paiassdsdvtpveeehpevqh----           | 1858 |
| <i>Anopheles coluzzii</i> ; XP_040218532.1    | ittpaavqaeqdekqqt-t-----paiaasdsdvtqveeehpdvqh----           | 1858 |
| <i>Anopheles darlingi</i> ; ETN65512.1        | -----                                                        | 1055 |
| <i>Aedes albopictus</i> ; XP_029723621.1      | -errk-----                                                   | 1571 |
| <i>Drosophila melanogaster</i> ; ABW09325.1   | kp-----esgideksal-----askeasrpesv-tdkskepsrresiaes           | 1652 |
| <i>Aedes aegypti</i> ; XP_021710788.1         | vakvdavgedlhkktqqvdekvasedkiktsveqaaikaesvltsetekkeleklad    | 1608 |
| <i>Culex quinquefasciatus</i> ; EDS38616.1    | ttkadavsadlqqkaqqlddkvaanvdrvktevekaaakadevlttiaekkeieqlakd  | 1450 |
| <i>Culex pipiens pallens</i> ; XP_039443854.1 | atkadavsadlqqkaqqlddkvaanvdrvktevekaaakadevlttiatekkeieqlakd | 1610 |
| <i>Anopheles merus</i> ; XP_041782981.1       | -----adkvdedeepedd-----vpvttppq                              | 1875 |
| <i>Anopheles arabiensis</i> ; XP_040172246.1  | -----adkvgedeepedd-----vpvattppq                             | 1879 |
| <i>Anopheles coluzzii</i> ; XP_040218532.1    | -----adkvgedeepedd-----vpvattppq                             | 1879 |
| <i>Anopheles darlingi</i> ; ETN65512.1        | -----                                                        | 1055 |
| <i>Aedes albopictus</i> ; XP_029723621.1      | -----                                                        | 1571 |
| <i>Drosophila melanogaster</i> ; ABW09325.1   | lkaestkdeksappskeasrpgsvve---svkdetekskepsrresiaesakppiefrev | 1709 |
| <i>Aedes aegypti</i> ; XP_021710788.1         | lkqevs-----gqidatkkqlldelnkave-----qvqekaksgis----           | 1644 |
| <i>Culex quinquefasciatus</i> ; EDS38616.1    | ikeeva-----eklvetskqqlledelnktle-----kttdkakggis----         | 1486 |
| <i>Culex pipiens pallens</i> ; XP_039443854.1 | ikeeva-----eklvetskqqlledelnktle-----kttdkakggis----         | 1646 |

|                                               |                                                               |      |
|-----------------------------------------------|---------------------------------------------------------------|------|
| <i>Anopheles merus</i> ; XP_041782981.1       | vfvkpvstddeqqveqveqd-----sesdvqsvseh-----                     | 1906 |
| <i>Anopheles arabiensis</i> ; XP_040172246.1  | vfvkpvrtdddeqqveqveqd-----seldaqsvseh-----                    | 1910 |
| <i>Anopheles coluzzii</i> ; XP_040218532.1    | vfvkpvstddeqqveqveqd-----sesdaqsvseh-----                     | 1910 |
| <i>Anopheles darlingi</i> ; ETN65512.1        | -----                                                         | 1055 |
| <i>Aedes albopictus</i> ; XP_029723621.1      | -----                                                         | 1571 |
| <i>Drosophila melanogaster</i> ; ABW09325.1   | srpesvidgikdesakpesrrdsplaskeasrpesvlesvkdepiksteksrresvaesf  | 1769 |
| <i>Aedes aegypti</i> ; XP_021710788.1         | sffggitesiktgiekvadkvetklkdkt-eqvetrqlqevtdkieelkgkepveevc--- | 1700 |
| <i>Culex quinquefasciatus</i> ; EDS38616.1    | sffggiadgikseiekiadkmetkikdkt-dqvetklqkvtekieelngkqaeeevs---  | 1542 |
| <i>Culex pipiens pallens</i> ; XP_039443854.1 | sffggiadgikseiekiadkmetkikdkt-dqvetklqkvtekieelnekqveeevs---  | 1702 |
|                                               |                                                               |      |
| <i>Anopheles merus</i> ; XP_041782981.1       | -----attpaaifddseqtttadvaddsktvapvateqqtta                    | 1943 |
| <i>Anopheles arabiensis</i> ; XP_040172246.1  | -----attqaatfdseqtttadvaddnktvapvateqqtta                     | 1947 |
| <i>Anopheles coluzzii</i> ; XP_040218532.1    | -----attqaatfdseqtttadvaddsktvapvateqqtta                     | 1947 |
| <i>Anopheles darlingi</i> ; ETN65512.1        | -----                                                         | 1055 |
| <i>Aedes albopictus</i> ; XP_029723621.1      | -----sasmdvqklfiarqrmpvqiett-----vmra--                       | 1599 |
| <i>Drosophila melanogaster</i> ; ABW09325.1   | kadstkdekspltskdisrpesavenvmdavgsaersqpesvtas-----rdvsrp      | 1820 |
| <i>Aedes aegypti</i> ; XP_021710788.1         | -----vkkevtvpepseqtigfeqsfgy-ertftq-----                      | 1730 |
| <i>Culex quinquefasciatus</i> ; EDS38616.1    | -----qpa-----epeqtgfdapfgy-ertftq-----                        | 1564 |
| <i>Culex pipiens pallens</i> ; XP_039443854.1 | -----qpa-----epeqtgfdapfgy-ertftq-----                        | 1724 |

---

|                                               |                                                               |      |
|-----------------------------------------------|---------------------------------------------------------------|------|
| <i>Anopheles merus</i> ; XP_041782981.1       | aplqdgekedsekpvsddasapaad-----ddesqeegteqtdkppkvpvaqaa        | 1994 |
| <i>Anopheles arabiensis</i> ; XP_040172246.1  | apvqdgekedsekpvsddasapaad-----ddesqeegteqtdtpkvpvaqaa         | 1998 |
| <i>Anopheles coluzzii</i> ; XP_040218532.1    | apvqdgekedsekpvsddasapaad-----ddesqeegseqqthtpskvpvaqaa       | 1998 |
| <i>Anopheles darlingi</i> ; ETN65512.1        | -----                                                         | 1055 |
| <i>Aedes albopictus</i> ; XP_029723621.1      | -----qpkhl-----                                               | 1604 |
| <i>Drosophila melanogaster</i> ; ABW09325.1   | esvaesekddtdkpesvvesvipasdvve-----iekgaadk-----               | 1857 |
| <i>Aedes aegypti</i> ; XP_021710788.1         | -elrethittldspvtdvdvkvdmkssvnpqhidedkeleesq-----              | 1776 |
| <i>Culex quinquefasciatus</i> ; EDS38616.1    | -elrethittldspvseadkmaelsavsipqhidedkeleeietqn-----           | 1610 |
| <i>Culex pipiens pallens</i> ; XP_039443854.1 | -elrethittldspvseadkmaelsavsipqhidedkeleeietqn-----           | 1770 |
|                                               |                                                               |      |
| <i>Anopheles merus</i> ; XP_041782981.1       | ddvsedsmyptepvpatnvadvteavlqdsqegeqvehdddeeqtrttlppqvtqdekyq  | 2054 |
| <i>Anopheles arabiensis</i> ; XP_040172246.1  | ndvseetmyptepvpatnvadvteavmkdsqeddqvehdddeeqtrttlppqvtqdekyq  | 2058 |
| <i>Anopheles coluzzii</i> ; XP_040218532.1    | ddvsedsmyptepvpatnvtadvteavlqdsqedeqvehdddeeqtrttlppqvtqdekyq | 2058 |
| <i>Anopheles darlingi</i> ; ETN65512.1        | -----                                                         | 1055 |
| <i>Aedes albopictus</i> ; XP_029723621.1      | -----                                                         | 1604 |
| <i>Drosophila melanogaster</i> ; ABW09325.1   | ----ekgvfvsle---igkpdspsevisrp--gpvves-----vkpesr--resst      | 1897 |
| <i>Aedes aegypti</i> ; XP_021710788.1         | ----magsyviee---vkystfeeanlreikeeeedr-----vtpqkddkkss         | 1820 |
| <i>Culex quinquefasciatus</i> ; EDS38616.1    | ----msgsymiee---vkysfedanlrdikeeeedr-----tsppqkdeksft         | 1654 |
| <i>Culex pipiens pallens</i> ; XP_039443854.1 | ----msgsymiee---vkysfedanlrdikeeeedr-----tsppqkdeksft         | 1814 |

---

|                                               |                                                              |      |
|-----------------------------------------------|--------------------------------------------------------------|------|
| <i>Anopheles merus</i> ; XP_041782981.1       | pq-----pqeadaiakptepeqeapmed-----                            | 2077 |
| <i>Anopheles arabiensis</i> ; XP_040172246.1  | pq-----pqeadaiakptepeqeapmed-----                            | 2081 |
| <i>Anopheles coluzzii</i> ; XP_040218532.1    | pq-----pqeadaiakptepeqeapmed-----                            | 2081 |
| <i>Anopheles darlingi</i> ; ETN65512.1        | -----                                                        | 1055 |
| <i>Aedes albopictus</i> ; XP_029723621.1      | -----rkriks-----                                             | 1610 |
| <i>Drosophila melanogaster</i> ; ABW09325.1   | ----eivlpchaedskepsrpeskveclkdesevlkgstrresvaesdkssqpfketsrp | 1953 |
| <i>Aedes aegypti</i> ; XP_021710788.1         | pklepfvvpqra-----rtpedvakivanvaevlksdkdleeiip-----gf----dp   | 1864 |
| <i>Culex quinquefasciatus</i> ; EDS38616.1    | pklepavqptrs-----rtpedvakivanvaevlksdkditeiip-----gf----dp   | 1698 |
| <i>Culex pipiens pallens</i> ; XP_039443854.1 | pklepavqptrs-----rtpedvakivanvaevlksdkditeiip-----gf----dp   | 1858 |

|                                               |                                                            |      |
|-----------------------------------------------|------------------------------------------------------------|------|
| <i>Anopheles merus</i> ; XP_041782981.1       | -----evefepeqdkqtaapqaveeqdqhttpstvtssasldeevepeadkeed     | 2127 |
| <i>Anopheles arabiensis</i> ; XP_040172246.1  | -----evefepeqekqtaapqaveeqdqhttpstvtssasldeevepeadkeed     | 2131 |
| <i>Anopheles coluzzii</i> ; XP_040218532.1    | -----evefepeqekqtaapqaveehdqhttpstlssasldeevkpeadkeed      | 2131 |
| <i>Anopheles darlingi</i> ; ETN65512.1        | -----                                                      | 1055 |
| <i>Aedes albopictus</i> ; XP_029723621.1      | -----agmirk-----                                           | 1616 |
| <i>Drosophila melanogaster</i> ; ABW09325.1   | esavgsmkdesmskepsrre--svkdgaagsret--srpasvaesakdga-----dd- | 2001 |
| <i>Aedes aegypti</i> ; XP_021710788.1         | h-----el----er----klsqgaareedigtvqrmlvtassedgg-----eet     | 1900 |
| <i>Culex quinquefasciatus</i> ; EDS38616.1    | k-----el----er----klsqgtareedvstvqrmlvtassedgg-----eet     | 1734 |
| <i>Culex pipiens pallens</i> ; XP_039443854.1 | k-----el----er----klsqgtareedvstvqrmlvtassedgg-----eet     | 1894 |

---

|                                               |                                                              |      |
|-----------------------------------------------|--------------------------------------------------------------|------|
| <i>Anopheles merus</i> ; XP_041782981.1       | tmgekvhittarvpamesddkhedqpeadlpepsigvade-----eds-----        | 2170 |
| <i>Anopheles arabiensis</i> ; XP_040172246.1  | tmdekvhvttarvpametddkhedqpeadlsepsigdade-----eds-----        | 2174 |
| <i>Anopheles coluzzii</i> ; XP_040218532.1    | tmdekvhvttarvpametddkhedqpeadlpepsigdade-----dds-----        | 2174 |
| <i>Anopheles darlingi</i> ; ETN65512.1        | -----                                                        | 1055 |
| <i>Aedes albopictus</i> ; XP_029723621.1      | -----                                                        | 1616 |
| <i>Drosophila melanogaster</i> ; ABW09325.1   | -----lkelsrpes-----ttqskeagsikdeksplaseearpasvaesvkde        | 2045 |
| <i>Aedes aegypti</i> ; XP_021710788.1         | vicpdgtitfskattpep-----pissgkttpeikvdedave-----              | 1936 |
| <i>Culex quinquefasciatus</i> ; EDS38616.1    | vicppgtitfskattpep-----ptsgkttpeikvdee-----                  | 1767 |
| <i>Culex pipiens pallens</i> ; XP_039443854.1 | vicppgtitfskattpep-----ptsgkttpeikvdee-----                  | 1927 |
|                                               |                                                              |      |
| <i>Anopheles merus</i> ; XP_041782981.1       | -----ysttfatpertglldaeqd-----kkp                             | 2192 |
| <i>Anopheles arabiensis</i> ; XP_040172246.1  | -----ysttfatpertglldaeqa-----tkp                             | 2196 |
| <i>Anopheles coluzzii</i> ; XP_040218532.1    | -----ysttfatpertglldaeqd-----tkp                             | 2196 |
| <i>Anopheles darlingi</i> ; ETN65512.1        | -----                                                        | 1055 |
| <i>Aedes albopictus</i> ; XP_029723621.1      | -----                                                        | 1616 |
| <i>Drosophila melanogaster</i> ; ABW09325.1   | aekskeesrresvaeksplpskea---srpasvaesikdea--ekskeesrresvaeksp | 2100 |
| <i>Aedes aegypti</i> ; XP_021710788.1         | -----vkepsevrpekqlpevkqdekaspssgksspdllktsptsieek-----dkhe   | 1984 |
| <i>Culex quinquefasciatus</i> ; EDS38616.1    | -----seakpekpslpevkpdgktsptssgksspdllktsptsieek-----dkhe     | 1812 |
| <i>Culex pipiens pallens</i> ; XP_039443854.1 | -----seakpekpslpevkpdgktsptssgksspdllktsptsieek-----dkhe     | 1972 |

---

|                                               |                                                              |      |
|-----------------------------------------------|--------------------------------------------------------------|------|
| <i>Anopheles merus</i> ; XP_041782981.1       | veketadsnttvqppspmy---desiepeadsqhkdap-----                  | 2227 |
| <i>Anopheles arabiensis</i> ; XP_040172246.1  | vekemaesnttvqppspvy---desiepeadsqhkdap-----                  | 2231 |
| <i>Anopheles coluzzii</i> ; XP_040218532.1    | veketaesnttvqppspvy---deaiepeadsqhkdap-----                  | 2231 |
| <i>Anopheles darlingi</i> ; ETN65512.1        | -----                                                        | 1055 |
| <i>Aedes albopictus</i> ; XP_029723621.1      | -----                                                        | 1616 |
| <i>Drosophila melanogaster</i> ; ABW09325.1   | lpskeasrpa--sv-----aesikdeaeksreesrresva-----eksplp          | 2139 |
| <i>Aedes aegypti</i> ; XP_021710788.1         | lpekvwieak--ktpekitedrkesiaeqyaq-iddsrresaistfserdytkdessild | 2041 |
| <i>Culex quinquefasciatus</i> ; EDS38616.1    | lpeksadakk--tpekkiieerkesiadqydr-iddsrresaistfserdytkdessfvd | 1869 |
| <i>Culex pipiens pallens</i> ; XP_039443854.1 | lpeksadakk--tpekkiieerkesiadqydr-iddsrresaistfserdytkdessfvd | 2029 |

|                                               |                                                                |      |
|-----------------------------------------------|----------------------------------------------------------------|------|
| <i>Anopheles merus</i> ; XP_041782981.1       | -----s-----stalpvt-----taaaleedevqdndk                         | 2250 |
| <i>Anopheles arabiensis</i> ; XP_040172246.1  | -----s-----stalpvt-----taapleedevqdndk                         | 2254 |
| <i>Anopheles coluzzii</i> ; XP_040218532.1    | -----s-----stalpvt-----taapleedevqdndk                         | 2254 |
| <i>Anopheles darlingi</i> ; ETN65512.1        | -----                                                          | 1055 |
| <i>Aedes albopictus</i> ; XP_029723621.1      | -----                                                          | 1616 |
| <i>Drosophila melanogaster</i> ; ABW09325.1   | skeasrpaesvaesikdeaeksreesrresvaeksplpskeasrpaesvaesikdeaekske | 2199 |
| <i>Aedes aegypti</i> ; XP_021710788.1         | erdssrahsisshisdike-----dvadvksvteflkesdkqqev                  | 2081 |
| <i>Culex quinquefasciatus</i> ; EDS38616.1    | erdssrahsisshisdike-----daadvksvaeifketdekqde                  | 1909 |
| <i>Culex pipiens pallens</i> ; XP_039443854.1 | erdssrahsisshisdike-----daadvksvaeifketdekqde                  | 2069 |



---

|                                               |                                                             |      |
|-----------------------------------------------|-------------------------------------------------------------|------|
| <i>Anopheles merus</i> ; XP_041782981.1       | dgkstt--vqpaliseedaqpsttaasvaeper--dlpsegtvvgda-----qdeeqt  | 2300 |
| <i>Anopheles arabiensis</i> ; XP_040172246.1  | dgkatt--vqpaliseedsqpsttaasvqgeper--dlpsegtvvsda-----qdeeqt | 2304 |
| <i>Anopheles coluzzii</i> ; XP_040218532.1    | dgkatt--vqpaliseedrqpsttaasvqaeper--dlpsegtvvsda-----qdeeqt | 2304 |
| <i>Anopheles darlingi</i> ; ETN65512.1        | -----                                                       | 1055 |
| <i>Aedes albopictus</i> ; XP_029723621.1      | -----                                                       | 1616 |
| <i>Drosophila melanogaster</i> ; ABW09325.1   | esrresvaeksplpskeasrpasvaesikdeaekskeesrresvaeksp-----lp-s  | 2251 |
| <i>Aedes aegypti</i> ; XP_021710788.1         | ftepekqkdsltkseelsspesitsq-----ktvseksvaaevlmkseekipqe      | 2132 |
| <i>Culex quinquefasciatus</i> ; EDS38616.1    | vg-----kattkkadelsspsdsvtsq-----ktvseksvadkpltdddka-----    | 1949 |
| <i>Culex pipiens pallens</i> ; XP_039443854.1 | vg-----katmkkadelsspsdsvtsq-----ktvseksvadkpltdddka-----    | 2109 |

|                                               |                                                              |      |
|-----------------------------------------------|--------------------------------------------------------------|------|
| <i>Anopheles merus</i> ; XP_041782981.1       | deattaasvsesd-----ekvqptvssttglpvafdave---vgatseeehddae      | 2347 |
| <i>Anopheles arabiensis</i> ; XP_040172246.1  | deattpasvpesd-----ekvqptvssttglpvafdave---vgatseeehddae      | 2351 |
| <i>Anopheles coluzzii</i> ; XP_040218532.1    | deattpaslpesd-----ekvqptvssttglpvafdave---vgatseeehddae      | 2351 |
| <i>Anopheles darlingi</i> ; ETN65512.1        | -----                                                        | 1055 |
| <i>Aedes albopictus</i> ; XP_029723621.1      | -----                                                        | 1616 |
| <i>Drosophila melanogaster</i> ; ABW09325.1   | keasrpasvaesikdeaekskeesrresvaeksplp-----skeasrpasvaesikdeae | 2306 |
| <i>Aedes aegypti</i> ; XP_021710788.1         | tqssrpesaashi-----sskspldnvstspveisgpesa-----                | 2167 |
| <i>Culex quinquefasciatus</i> ; EDS38616.1    | --askpesvadek-----tts--ieakleaekeasrpasaase-----             | 1983 |
| <i>Culex pipiens pallens</i> ; XP_039443854.1 | --askpesvadek-----tts--ieakleaekeasrpasaase-----             | 2143 |

---

|                                               |                                                            |      |
|-----------------------------------------------|------------------------------------------------------------|------|
| <i>Anopheles merus</i> ; XP_041782981.1       | qpqt---ddl nad-desseeaeslaavttrap-----ekvsttaepas          | 2387 |
| <i>Anopheles arabiensis</i> ; XP_040172246.1  | qpqt---ddl nad-desseeaeslaavttrap-----ekvsttaepas          | 2391 |
| <i>Anopheles coluzzii</i> ; XP_040218532.1    | qpqt---ddl nad-desseeaeslaavttrap-----ekvsttaepas          | 2391 |
| <i>Anopheles darlingi</i> ; ETN65512.1        | -----                                                      | 1055 |
| <i>Aedes albopictus</i> ; XP_029723621.1      | -----                                                      | 1616 |
| <i>Drosophila melanogaster</i> ; ABW09325.1   | kskeetrresvaeksplpskeasrpasvaesikdeaekskeesrresaae-----ksp | 2359 |
| <i>Aedes aegypti</i> ; XP_021710788.1         | -----iptekspivdtksdntntckieakeqsrseasaasekm-----e          | 2205 |
| <i>Culex quinquefasciatus</i> ; EDS38616.1    | -----kapseksvekeaate-ksptaeaskepsrpesaashvsekaasek         | 2027 |
| <i>Culex pipiens pallens</i> ; XP_039443854.1 | -----kapseksvtaeavk---adekeaskepsrpesaashvsekaasek         | 2185 |

|                                               |                                                               |      |
|-----------------------------------------------|---------------------------------------------------------------|------|
| <i>Anopheles merus</i> ; XP_041782981.1       | tpvkevsaeeitpkpe-vyttvaesdsqvteqp-----ttvqaeagtste            | 2433 |
| <i>Anopheles arabiensis</i> ; XP_040172246.1  | ipvkevsaeeitpkpe-vyttvaesdsqvteqp-----ttvqaeagtste            | 2437 |
| <i>Anopheles coluzzii</i> ; XP_040218532.1    | tpvkevsaeeitpkpe-vyttvaesdsqvteqp-----ttvqaeagtste            | 2437 |
| <i>Anopheles darlingi</i> ; ETN65512.1        | -----                                                         | 1055 |
| <i>Aedes albopictus</i> ; XP_029723621.1      | -----                                                         | 1616 |
| <i>Drosophila melanogaster</i> ; ABW09325.1   | lpskeas-----rpsasvaesvkdeadkskeesrresmaesgkaqsikgdqspkvevrsrp | 2413 |
| <i>Aedes aegypti</i> ; XP_021710788.1         | dgakeip-----rpesvsvnvsekvpsdni-----e-gqqdskqssrp              | 2242 |
| <i>Culex quinquefasciatus</i> ; EDS38616.1    | idvkeas-----rpesvashvsekaaseks-----a-tlekpeessrp              | 2064 |
| <i>Culex pipiens pallens</i> ; XP_039443854.1 | idvkeas-----rpesvashvsekaaseks-----a-tlekpeessrp              | 2222 |

---

|                                               |                                                              |      |
|-----------------------------------------------|--------------------------------------------------------------|------|
| <i>Anopheles merus</i> ; XP_041782981.1       | vt---aahadttttskpsqdeiqttaaavdvirde---eqhseapeevvsqep---a-   | 2483 |
| <i>Anopheles arabiensis</i> ; XP_040172246.1  | vt---aahadttttskpaqdeiqttaaavdvirde---eqqhseapeevvsqep---a-  | 2487 |
| <i>Anopheles coluzzii</i> ; XP_040218532.1    | vt---aahadttttskpsqdeiqttaaavdvirde---eqhhseapeevvsqep---a-  | 2487 |
| <i>Anopheles darlingi</i> ; ETN65512.1        | -----                                                        | 1055 |
| <i>Aedes albopictus</i> ; XP_029723621.1      | -----                                                        | 1616 |
| <i>Drosophila melanogaster</i> ; ABW09325.1   | esvaesvkddpvkskepsrresvagsvtadsarddqspleskgasrpesvvdsvkdeaek | 2473 |
| <i>Aedes aegypti</i> ; XP_021710788.1         | esvasykgegavddkepsqpetilscgdvsatkadikpedikevsrpesvasvnekddt  | 2302 |
| <i>Culex quinquefasciatus</i> ; EDS38616.1    | asaasqaseka-----asekaeakeasrsesvashvsekaas                   | 2101 |
| <i>Culex pipiens pallens</i> ; XP_039443854.1 | asaasqaseka-----asekaeakeasrsesvashvsekaas                   | 2259 |

|                                               |                                                             |      |
|-----------------------------------------------|-------------------------------------------------------------|------|
| <i>Anopheles merus</i> ; XP_041782981.1       | -----vttstaattaqpvaa-----etdgpvressqpatttqedla              | 2520 |
| <i>Anopheles arabiensis</i> ; XP_040172246.1  | -----vttstaattaqpvaa-----etdgpvressqpatttqedla              | 2524 |
| <i>Anopheles coluzzii</i> ; XP_040218532.1    | -----vttstaattaqpvaa-----etdgpvressqpatttqedla              | 2524 |
| <i>Anopheles darlingi</i> ; ETN65512.1        | -----                                                       | 1055 |
| <i>Aedes albopictus</i> ; XP_029723621.1      | -----                                                       | 1616 |
| <i>Drosophila melanogaster</i> ; ABW09325.1   | qesrresktesvippkakddkspkevlqpvsmtetiredadqpmkpsqaes--rresia | 2530 |
| <i>Aedes aegypti</i> ; XP_021710788.1         | ekkaatks-e-----sp--ashptsietektsaetkessrpesvas--l---vs      | 2343 |
| <i>Culex quinquefasciatus</i> ; EDS38616.1    | eksvsek-----aaveqaesktdepsrpesaas--h---vs                   | 2132 |
| <i>Culex pipiens pallens</i> ; XP_039443854.1 | eksvsek-----aaveqaesktdepsrpesaas--h---vs                   | 2290 |

---

|                                               |                                                              |      |
|-----------------------------------------------|--------------------------------------------------------------|------|
| <i>Anopheles merus</i> ; XP_041782981.1       | sstvaapvaaqddkldekvdq-----avvpavpekppvsddseeqqeavkptftede-   | 2574 |
| <i>Anopheles arabiensis</i> ; XP_040172246.1  | sstvaapvaahddkldekvdq-----avvpavpekppvsddseeqqeavkptftede-   | 2578 |
| <i>Anopheles coluzzii</i> ; XP_040218532.1    | sstvaapvaaqddkldekvdq-----avvpavpekppvsddseeqqeavkptftede-   | 2578 |
| <i>Anopheles darlingi</i> ; ETN65512.1        | -----                                                        | 1055 |
| <i>Aedes albopictus</i> ; XP_029723621.1      | -----                                                        | 1616 |
| <i>Drosophila melanogaster</i> ; ABW09325.1   | esikassprdeksplaskeasrpgsvaesikydlkdpqiikddksteh--srresledks | 2588 |
| <i>Aedes aegypti</i> ; XP_021710788.1         | ek-----alpektdd-----                                         | 2353 |
| <i>Culex quinquefasciatus</i> ; EDS38616.1    | ek-----aveskltteqqsrpdsaashvseketap-----kep--srlesaasqv      | 2175 |
| <i>Culex pipiens pallens</i> ; XP_039443854.1 | ek-----aveskltteqqsrpdsaashvseketap-----kep--srpesaasqv      | 2333 |
|                                               |                                                              |      |
| <i>Anopheles merus</i> ; XP_041782981.1       | -hddqqkvqepvvgvsees-----sssspakptqqpetv                      | 2608 |
| <i>Anopheles arabiensis</i> ; XP_040172246.1  | -hddqqkvpepevvgvsees-----sspakptqqpetv                       | 2610 |
| <i>Anopheles coluzzii</i> ; XP_040218532.1    | -hddqqkvqepvvgvsees-----sslakptqqpetv                        | 2610 |
| <i>Anopheles darlingi</i> ; ETN65512.1        | -----                                                        | 1055 |
| <i>Aedes albopictus</i> ; XP_029723621.1      | -----                                                        | 1616 |
| <i>Drosophila melanogaster</i> ; ABW09325.1   | avtseksvsrplsvasdheaavaied-----dakssispkdksrpgfv             | 2631 |
| <i>Aedes aegypti</i> ; XP_021710788.1         | ----skevsrpesaashisdclvseqketipseketkespraesvasqetkehsrpesv  | 2409 |
| <i>Culex quinquefasciatus</i> ; EDS38616.1    | aekvdvkvsrpesaashvseksadk-----lsepkeasrpasa                  | 2214 |
| <i>Culex pipiens pallens</i> ; XP_039443854.1 | aekvdvkvsrpesaashvseksadk-----lsepkeasrpasa                  | 2372 |

---

|                                               |                                                            |      |
|-----------------------------------------------|------------------------------------------------------------|------|
| <i>Anopheles merus</i> ; XP_041782981.1       | gpsygapgqhydtgyghmppyppssyeddygeedpaafgpgtcryggklyvsaaqipr | 2668 |
| <i>Anopheles arabiensis</i> ; XP_040172246.1  | gpsygapgqhydtgyghmppyppssyeddygeedpaafgpgtcryggklyvsaaqipr | 2670 |
| <i>Anopheles coluzzii</i> ; XP_040218532.1    | gpsygapgqhydtgyghmppyppssyeddygeedpaafgpgtcryggklyvsaaqipr | 2670 |
| <i>Anopheles darlingi</i> ; ETN65512.1        | -----                                                      | 1055 |
| <i>Aedes albopictus</i> ; XP_029723621.1      | -----                                                      | 1616 |
| <i>Drosophila melanogaster</i> ; ABW09325.1   | aetvsspieeatmefskievve-----ksslals-lqggsggklqtdsspvdv      | 2678 |
| <i>Aedes aegypti</i> ; XP_021710788.1         | lsqks-----dk---pd-----n-----                               | 2419 |
| <i>Culex quinquefasciatus</i> ; EDS38616.1    | lsdka-----as----dksaesgkve-----                            | 2231 |
| <i>Culex pipiens pallens</i> ; XP_039443854.1 | lsdka-----as----dksvesgkve-----                            | 2389 |

|                                               |                                                              |      |
|-----------------------------------------------|--------------------------------------------------------------|------|
| <i>Anopheles merus</i> ; XP_041782981.1       | ddpcdfcfcfrsdiiclqqscpppisgcneepiagfccpryecpvsmatvlnvtt----- | 2723 |
| <i>Anopheles arabiensis</i> ; XP_040172246.1  | ddpcdfcfcfrsdiiclqqscpppisgcneepiagfccpryecpvsmatvlnvtt----- | 2725 |
| <i>Anopheles coluzzii</i> ; XP_040218532.1    | ddpcdfcfcfrsdiiclqqscpppisgcneepiagfccpryecpvsmatvlnvtt----- | 2725 |
| <i>Anopheles darlingi</i> ; ETN65512.1        | -----                                                        | 1055 |
| <i>Aedes albopictus</i> ; XP_029723621.1      | -----                                                        | 1616 |
| <i>Drosophila melanogaster</i> ; ABW09325.1   | -aegdfshavas---vs-t-----vtptltkpaelaqigaaktvsspl             | 2716 |
| <i>Aedes aegypti</i> ; XP_021710788.1         | -----                                                        | 2419 |
| <i>Culex quinquefasciatus</i> ; EDS38616.1    | -----                                                        | 2231 |
| <i>Culex pipiens pallens</i> ; XP_039443854.1 | -----                                                        | 2389 |

---

|                                               |                                                              |      |
|-----------------------------------------------|--------------------------------------------------------------|------|
| <i>Anopheles merus</i> ; XP_041782981.1       | sttttttlpphflshaykghvqkrgcqiqgkp--ynvgetvasasgpcmrctcggdgq-  | 2780 |
| <i>Anopheles arabiensis</i> ; XP_040172246.1  | sttttttlpphflshaykghvqkrgcqiqgkp--ynvgetvasasgpcmrctcggdgq-  | 2782 |
| <i>Anopheles coluzzii</i> ; XP_040218532.1    | sttttttlpphflshaykghvqkrgcqiqgkp--ynvgetvasasgpcmrctcggdgq-  | 2782 |
| <i>Anopheles darlingi</i> ; ETN65512.1        | -----                                                        | 1055 |
| <i>Aedes albopictus</i> ; XP_029723621.1      | -----                                                        | 1616 |
| <i>Drosophila melanogaster</i> ; ABW09325.1   | dealrtpsapehisrads-----paecaseeiasqdkspqvlkessrpawvaeskddaaq | 2771 |
| <i>Aedes aegypti</i> ; XP_021710788.1         | -----kqeamkgssrpesvasdvgeki-                                 | 2441 |
| <i>Culex quinquefasciatus</i> ; EDS38616.1    | -----adkdvkeasrpesaasvvgdke-                                 | 2253 |
| <i>Culex pipiens pallens</i> ; XP_039443854.1 | -----adkdvkeasrpesaasvigdke-                                 | 2411 |

|                                               |                                                             |      |
|-----------------------------------------------|-------------------------------------------------------------|------|
| <i>Anopheles merus</i> ; XP_041782981.1       | m-----qcepkac-----spepmlqqmiavaaa                           | 2803 |
| <i>Anopheles arabiensis</i> ; XP_040172246.1  | m-----qcepkac-----spepmlqqmiavaaa                           | 2805 |
| <i>Anopheles coluzzii</i> ; XP_040218532.1    | m-----qcepkac-----spepmlqqmiavaaa                           | 2805 |
| <i>Anopheles darlingi</i> ; ETN65512.1        | -----                                                       | 1055 |
| <i>Aedes albopictus</i> ; XP_029723621.1      | -----                                                       | 1616 |
| <i>Drosophila melanogaster</i> ; ABW09325.1   | lkssvedlrspvasteisrpaasetasspieeapkdfaefeqaeka--vlptlielkgn | 2829 |
| <i>Aedes aegypti</i> ; XP_021710788.1         | -----tsee-----kseeikdgsrpesvasqivetts                       | 2469 |
| <i>Culex quinquefasciatus</i> ; EDS38616.1    | -----ekepsrpv-----saapseklvkeasrpesaashtsekdda              | 2290 |
| <i>Culex pipiens pallens</i> ; XP_039443854.1 | -----ekepsrpv-----saapseklvkeasrpesaashtsekd--              | 2446 |

|                                               |                                                              |      |
|-----------------------------------------------|--------------------------------------------------------------|------|
| <i>Anopheles merus</i> ; XP_041782981.1       | -----r-----                                                  | 2804 |
| <i>Anopheles arabiensis</i> ; XP_040172246.1  | -----r-----                                                  | 2806 |
| <i>Anopheles coluzzii</i> ; XP_040218532.1    | -----r-----                                                  | 2806 |
| <i>Anopheles darlingi</i> ; ETN65512.1        | -----                                                        | 1055 |
| <i>Aedes albopictus</i> ; XP_029723621.1      | -----                                                        | 1616 |
| <i>Drosophila melanogaster</i> ; ABW09325.1   | lptlsspvdvahgdfpqtstptssptvasvqp-aelskvdiekta-----sspideapks | 2883 |
| <i>Aedes aegypti</i> ; XP_021710788.1         | -----rvakdvdekqtarsesvashvseksst                             | 2496 |
| <i>Culex quinquefasciatus</i> ; EDS38616.1    | lvais--ddkkdgkepsr--p---esvashvsekaeektdvkeasrpesvashvsekpaa | 2343 |
| <i>Culex pipiens pallens</i> ; XP_039443854.1 | -----dkkdgkepsr--p---esvashvsekaeektdvkeasrpesvashvsekpaa    | 2493 |
|                                               |                                                              |      |
| <i>Anopheles merus</i> ; XP_041782981.1       | -----rr-----                                                 | 2806 |
| <i>Anopheles arabiensis</i> ; XP_040172246.1  | -----rr-----                                                 | 2808 |
| <i>Anopheles coluzzii</i> ; XP_040218532.1    | -----rr-----                                                 | 2808 |
| <i>Anopheles darlingi</i> ; ETN65512.1        | -----                                                        | 1055 |
| <i>Aedes albopictus</i> ; XP_029723621.1      | -----                                                        | 1616 |
| <i>Drosophila melanogaster</i> ; ABW09325.1   | li--gcpaeerpespaesa--kdaae--svekskdarppsvvestkadstkgdispspe  | 2937 |
| <i>Aedes aegypti</i> ; XP_021710788.1         | ekapaameasrpesvtslisdket---kkaeskeasrpesavshisek-eevksss---  | 2549 |
| <i>Culex quinquefasciatus</i> ; EDS38616.1    | ek--aethasrpesvashvsekdateeqtkteakeasrpesvashvsek-issdksp--- | 2397 |
| <i>Culex pipiens pallens</i> ; XP_039443854.1 | ek--aethasrpesvashvsekdateeqtkteakeasrpesvashvsek-issdksp--- | 2547 |

---

|                                               |                                                             |      |
|-----------------------------------------------|-------------------------------------------------------------|------|
| <i>Anopheles merus</i> ; XP_041782981.1       | -----                                                       | 2806 |
| <i>Anopheles arabiensis</i> ; XP_040172246.1  | -----                                                       | 2808 |
| <i>Anopheles coluzzii</i> ; XP_040218532.1    | -----                                                       | 2808 |
| <i>Anopheles darlingi</i> ; ETN65512.1        | -----                                                       | 1055 |
| <i>Aedes albopictus</i> ; XP_029723621.1      | -----                                                       | 1616 |
| <i>Drosophila melanogaster</i> ; ABW09325.1   | svlegpkddvekskessrppsvsasitgdstk-----dvsrpsasvsvkdehdk      | 2987 |
| <i>Aedes aegypti</i> ; XP_021710788.1         | -svekdvaktdeakeasrpdsvashvsekdake-----asrpsavshvseqldt      | 2598 |
| <i>Culex quinquefasciatus</i> ; EDS38616.1    | -lvd-kveekptgkeesrpesvashvsekaasdksshldkpeesrpasaasqasekaas | 2455 |
| <i>Culex pipiens pallens</i> ; XP_039443854.1 | -lvd-kveekstgkeesrpesvashvsekaasdksshldkpeesrpasaasqasekatf | 2605 |

|                                               |                                                             |      |
|-----------------------------------------------|-------------------------------------------------------------|------|
| <i>Anopheles merus</i> ; XP_041782981.1       | -----                                                       | 2806 |
| <i>Anopheles arabiensis</i> ; XP_040172246.1  | -----                                                       | 2808 |
| <i>Anopheles coluzzii</i> ; XP_040218532.1    | -----                                                       | 2808 |
| <i>Anopheles darlingi</i> ; ETN65512.1        | -----                                                       | 1055 |
| <i>Aedes albopictus</i> ; XP_029723621.1      | -----                                                       | 1616 |
| <i>Drosophila melanogaster</i> ; ABW09325.1   | aesrresiakvesvideagksdsksssqdsqkdekstlaskeasrresvveskdda-ek | 3046 |
| <i>Aedes aegypti</i> ; XP_021710788.1         | -----ykletkeasrpesrtshtseiidak                              | 2623 |
| <i>Culex quinquefasciatus</i> ; EDS38616.1    | -----ekpde-----                                             | 2460 |
| <i>Culex pipiens pallens</i> ; XP_039443854.1 | -----ekpde-----                                             | 2610 |



---

|                                               |                                                              |      |
|-----------------------------------------------|--------------------------------------------------------------|------|
| <i>Anopheles merus</i> ; XP_041782981.1       | -----                                                        | 2806 |
| <i>Anopheles arabiensis</i> ; XP_040172246.1  | -----                                                        | 2808 |
| <i>Anopheles coluzzii</i> ; XP_040218532.1    | -----                                                        | 2808 |
| <i>Anopheles darlingi</i> ; ETN65512.1        | -----                                                        | 1055 |
| <i>Aedes albopictus</i> ; XP_029723621.1      | -----                                                        | 1616 |
| <i>Drosophila melanogaster</i> ; ABW09325.1   | sesrpesviasgevpreskspldskdtsrpgsmvesvtaede--kseqqsrrsesvaesv | 3104 |
| <i>Aedes aegypti</i> ; XP_021710788.1         | lkeepklvetkd--v---aqpdakmeetsrpesvvshasekvstdkateavrpdsteshi | 2678 |
| <i>Culex quinquefasciatus</i> ; EDS38616.1    | -----keasrpesvvshvsekaaseksatlekp-----                       | 2488 |
| <i>Culex pipiens pallens</i> ; XP_039443854.1 | -----keasrpesvvshvsekaaseksatlekp-----                       | 2638 |
|                                               |                                                              |      |
| <i>Anopheles merus</i> ; XP_041782981.1       | -----                                                        | 2806 |
| <i>Anopheles arabiensis</i> ; XP_040172246.1  | -----                                                        | 2808 |
| <i>Anopheles coluzzii</i> ; XP_040218532.1    | -----                                                        | 2808 |
| <i>Anopheles darlingi</i> ; ETN65512.1        | -----                                                        | 1055 |
| <i>Aedes albopictus</i> ; XP_029723621.1      | -----                                                        | 1616 |
| <i>Drosophila melanogaster</i> ; ABW09325.1   | kadtckdgsqeasrpssvdellkdddekqesrrqsitgshkamstmgdespmdkadksk  | 3164 |
| <i>Aedes aegypti</i> ; XP_021710788.1         | --gakattmqeetsrpmsvasnv-----sekld-tkkeepk                    | 2711 |
| <i>Culex quinquefasciatus</i> ; EDS38616.1    | -----eessrptsasqa-----setap-sekqdak                          | 2513 |
| <i>Culex pipiens pallens</i> ; XP_039443854.1 | -----eessrptsasqa-----setap-sekqdak                          | 2663 |

|                                               |                                                             |      |
|-----------------------------------------------|-------------------------------------------------------------|------|
| <i>Anopheles merus</i> ; XP_041782981.1       | -----                                                       | 2806 |
| <i>Anopheles arabiensis</i> ; XP_040172246.1  | -----                                                       | 2808 |
| <i>Anopheles coluzzii</i> ; XP_040218532.1    | -----                                                       | 2808 |
| <i>Anopheles darlingi</i> ; ETN65512.1        | -----                                                       | 1055 |
| <i>Aedes albopictus</i> ; XP_029723621.1      | -----                                                       | 1616 |
| <i>Drosophila melanogaster</i> ; ABW09325.1   | epsrpesvaesikhentk-----deespl-----                          | 3188 |
| <i>Aedes aegypti</i> ; XP_021710788.1         | dssrpesviseatsdkfdek-----q-----kdtlqsvasqe                  | 2743 |
| <i>Culex quinquefasciatus</i> ; EDS38616.1    | easrpesaashvsekaaseksamlekpeekeasrpsatsqvsekatsekdtpeaktdgk | 2573 |
| <i>Culex pipiens pallens</i> ; XP_039443854.1 | easrpesaashvsekaaseksamlekpeekeasrpsatsqvsekatsekntpeaktdgk | 2723 |
|                                               |                                                             |      |
| <i>Anopheles merus</i> ; XP_041782981.1       | -----                                                       | 2806 |
| <i>Anopheles arabiensis</i> ; XP_040172246.1  | -----                                                       | 2808 |
| <i>Anopheles coluzzii</i> ; XP_040218532.1    | -----                                                       | 2808 |
| <i>Anopheles darlingi</i> ; ETN65512.1        | -----                                                       | 1055 |
| <i>Aedes albopictus</i> ; XP_029723621.1      | -----                                                       | 1616 |
| <i>Drosophila melanogaster</i> ; ABW09325.1   | -gsrrdsvaesik-sditkgeksplpskevsvgsikdekaesrresvaesvkpes     | 3246 |
| <i>Aedes aegypti</i> ; XP_021710788.1         | ivktsekveseliasqvsektsvkseveessrpesvashlsekas-----          | 2788 |
| <i>Culex quinquefasciatus</i> ; EDS38616.1    | easrsesvashvsekaasdkaeekpaskeasrpesvashvsekaa-----          | 2618 |
| <i>Culex pipiens pallens</i> ; XP_039443854.1 | easrsesvashvsekaasdkaeekp-----                              | 2748 |

---

|                                               |                                                            |      |
|-----------------------------------------------|------------------------------------------------------------|------|
| <i>Anopheles merus</i> ; XP_041782981.1       | -----                                                      | 2806 |
| <i>Anopheles arabiensis</i> ; XP_040172246.1  | -----                                                      | 2808 |
| <i>Anopheles coluzzii</i> ; XP_040218532.1    | -----                                                      | 2808 |
| <i>Anopheles darlingi</i> ; ETN65512.1        | -----                                                      | 1055 |
| <i>Aedes albopictus</i> ; XP_029723621.1      | -----                                                      | 1616 |
| <i>Drosophila melanogaster</i> ; ABW09325.1   | skdatsappskehsrpesvlgslkdegdktsrrvsvadsikdeksllvsqearpesea | 3306 |
| <i>Aedes aegypti</i> ; XP_021710788.1         | sdkvei---kdssrpesvashisektssad-----aks-----                | 2818 |
| <i>Culex quinquefasciatus</i> ; EDS38616.1    | sdkaeekpaskeasrpesvashvsekaasek-----satlekp-----           | 2656 |
| <i>Culex pipiens pallens</i> ; XP_039443854.1 | -----askeasrpesvashvsekaasek-----satlekp-----              | 2778 |

|                                               |                                                           |      |
|-----------------------------------------------|-----------------------------------------------------------|------|
| <i>Anopheles merus</i> ; XP_041782981.1       | -----                                                     | 2806 |
| <i>Anopheles arabiensis</i> ; XP_040172246.1  | -----                                                     | 2808 |
| <i>Anopheles coluzzii</i> ; XP_040218532.1    | -----                                                     | 2808 |
| <i>Anopheles darlingi</i> ; ETN65512.1        | -----                                                     | 1055 |
| <i>Aedes albopictus</i> ; XP_029723621.1      | -----                                                     | 1616 |
| <i>Drosophila melanogaster</i> ; ABW09325.1   | eslkdaaapsqetsrpesvtesvkdgkspvaskeasrpaenakdsadeskeqrpesl | 3366 |
| <i>Aedes aegypti</i> ; XP_021710788.1         | -----paasrpdsvashssdkvaekedikkeel                         | 2846 |
| <i>Culex quinquefasciatus</i> ; EDS38616.1    | -----eessrpasaasqaseka-----                               | 2673 |
| <i>Culex pipiens pallens</i> ; XP_039443854.1 | -----eessrpasatsqaseka-----                               | 2795 |

---

|                                               |                                                            |      |
|-----------------------------------------------|------------------------------------------------------------|------|
| <i>Anopheles merus</i> ; XP_041782981.1       | -----                                                      | 2806 |
| <i>Anopheles arabiensis</i> ; XP_040172246.1  | -----                                                      | 2808 |
| <i>Anopheles coluzzii</i> ; XP_040218532.1    | -----                                                      | 2808 |
| <i>Anopheles darlingi</i> ; ETN65512.1        | -----                                                      | 1055 |
| <i>Aedes albopictus</i> ; XP_029723621.1      | -----                                                      | 1616 |
| <i>Drosophila melanogaster</i> ; ABW09325.1   | pqskagsikdeksplaskdeaeksesrresvaeqplvskevsrpsasvaesvkdeae- | 3425 |
| <i>Aedes aegypti</i> ; XP_021710788.1         | haat-----qkevkeaqrpesasshv-----                            | 2867 |
| <i>Culex quinquefasciatus</i> ; EDS38616.1    | -pse-----kpdakeasrpdasaashvsekaas                          | 2699 |
| <i>Culex pipiens pallens</i> ; XP_039443854.1 | -pse-----kpdakeasrpdasaashvsekaas                          | 2821 |

|                                               |                                                                |      |
|-----------------------------------------------|----------------------------------------------------------------|------|
| <i>Anopheles merus</i> ; XP_041782981.1       | -----                                                          | 2806 |
| <i>Anopheles arabiensis</i> ; XP_040172246.1  | -----                                                          | 2808 |
| <i>Anopheles coluzzii</i> ; XP_040218532.1    | -----                                                          | 2808 |
| <i>Anopheles darlingi</i> ; ETN65512.1        | -----                                                          | 1055 |
| <i>Aedes albopictus</i> ; XP_029723621.1      | -----                                                          | 1616 |
| <i>Drosophila melanogaster</i> ; ABW09325.1   | -kskeesplmskeasrpasvagsvkdeaeksesrr-----esvaek-----sp          | 3469 |
| <i>Aedes aegypti</i> ; XP_021710788.1         | -----sdkpevkdtstrpesvashasekgpsdkidikdet--kglvqpmplvpsqektdskq | 2920 |
| <i>Culex quinquefasciatus</i> ; EDS38616.1    | eksmtdkpeekeasrpasaashvsekaaseksatlekpddkessrps-----salsq      | 2752 |
| <i>Culex pipiens pallens</i> ; XP_039443854.1 | eksttdkpeekeasrpasaashvsekaaseksatlekpddkessrps-----salsq      | 2874 |

|                                               |                                                              |      |
|-----------------------------------------------|--------------------------------------------------------------|------|
| <i>Anopheles merus</i> ; XP_041782981.1       | -----                                                        | 2806 |
| <i>Anopheles arabiensis</i> ; XP_040172246.1  | -----                                                        | 2808 |
| <i>Anopheles coluzzii</i> ; XP_040218532.1    | -----                                                        | 2808 |
| <i>Anopheles darlingi</i> ; ETN65512.1        | -----                                                        | 1055 |
| <i>Aedes albopictus</i> ; XP_029723621.1      | -----                                                        | 1616 |
| <i>Drosophila melanogaster</i> ; ABW09325.1   | lpskeasrpasvaesvkdeadkskeesrresgaeksplaskeasrpasvaesikdeaeks | 3529 |
| <i>Aedes aegypti</i> ; XP_021710788.1         | deknelsrpescashvsekemset-----tetklgsmevaqlksias----qasek     | 2967 |
| <i>Culex quinquefasciatus</i> ; EDS38616.1    | adekeasrpesaashvsekvksegt-----kpedk---pvsrpesmvg----etkps    | 2796 |
| <i>Culex pipiens pallens</i> ; XP_039443854.1 | adekeasrpesaashvsekvksegt-----khedk---pvsrpesmdg----etkps    | 2918 |
|                                               |                                                              |      |
| <i>Anopheles merus</i> ; XP_041782981.1       | -----                                                        | 2806 |
| <i>Anopheles arabiensis</i> ; XP_040172246.1  | -----                                                        | 2808 |
| <i>Anopheles coluzzii</i> ; XP_040218532.1    | -----                                                        | 2808 |
| <i>Anopheles darlingi</i> ; ETN65512.1        | -----                                                        | 1055 |
| <i>Aedes albopictus</i> ; XP_029723621.1      | -----                                                        | 1616 |
| <i>Drosophila melanogaster</i> ; ABW09325.1   | keesrresvaeksplpskeasrptsvaesvkdeaekskeesrdsvaeksplaskeasrp  | 3589 |
| <i>Aedes aegypti</i> ; XP_021710788.1         | ---tstevietkvvskepsrpesvashtseh-----aetk-----sdakessrs       | 3009 |
| <i>Culex quinquefasciatus</i> ; EDS38616.1    | ----dkaedkpdgkqakeasrpessashvsekaasdktedk-----qakeasrp       | 2843 |
| <i>Culex pipiens pallens</i> ; XP_039443854.1 | ----dkvedkpedkqakeasrpv-----sekaasdktedk-----qakeasrp        | 2959 |

---

|                                               |                                                               |      |
|-----------------------------------------------|---------------------------------------------------------------|------|
| <i>Anopheles merus</i> ; XP_041782981.1       | -----                                                         | 2806 |
| <i>Anopheles arabiensis</i> ; XP_040172246.1  | -----                                                         | 2808 |
| <i>Anopheles coluzzii</i> ; XP_040218532.1    | -----                                                         | 2808 |
| <i>Anopheles darlingi</i> ; ETN65512.1        | -----                                                         | 1055 |
| <i>Aedes albopictus</i> ; XP_029723621.1      | -----                                                         | 1616 |
| <i>Drosophila melanogaster</i> ; ABW09325.1   | asvaesvqdeaekskeesrresvaeksplaskeasrpsasvaesikdeaekskeesrresv | 3649 |
| <i>Aedes aegypti</i> ; XP_021710788.1         | asvashvsdks-----epkpevedasrpesvashtsdkehstekeskstye           | 3055 |
| <i>Culex quinquefasciatus</i> ; EDS38616.1    | esvashvsekaasdkpla---dkaeetsaskeasrpesvashvsekaasekst-----    | 2894 |
| <i>Culex pipiens pallens</i> ; XP_039443854.1 | esvashvsekaasdkppla---dkaeetsaskeasrpesvashvsekaasekst-----   | 3010 |

|                                               |                                                               |      |
|-----------------------------------------------|---------------------------------------------------------------|------|
| <i>Anopheles merus</i> ; XP_041782981.1       | -----                                                         | 2806 |
| <i>Anopheles arabiensis</i> ; XP_040172246.1  | -----                                                         | 2808 |
| <i>Anopheles coluzzii</i> ; XP_040218532.1    | -----                                                         | 2808 |
| <i>Anopheles darlingi</i> ; ETN65512.1        | -----                                                         | 1055 |
| <i>Aedes albopictus</i> ; XP_029723621.1      | -----                                                         | 1616 |
| <i>Drosophila melanogaster</i> ; ABW09325.1   | aeksplaskeasrptsvaesvkdeaekskeessrdsvaeksplaskeasrpsasvaesvqd | 3709 |
| <i>Aedes aegypti</i> ; XP_021710788.1         | ikgqlpeskeastlesatnvtgkvptdd-----gk-----                      | 3086 |
| <i>Culex quinquefasciatus</i> ; EDS38616.1    | ---qlekpeessrpvsaaashvsekavsek-----adametsrpesvashvse         | 2938 |
| <i>Culex pipiens pallens</i> ; XP_039443854.1 | ---qlekpeessrpvsaaashvsekavsek-----adaketrspevvshvse          | 3054 |

---

|                                               |                                                          |      |
|-----------------------------------------------|----------------------------------------------------------|------|
| <i>Anopheles merus</i> ; XP_041782981.1       | -----                                                    | 2806 |
| <i>Anopheles arabiensis</i> ; XP_040172246.1  | -----                                                    | 2808 |
| <i>Anopheles coluzzii</i> ; XP_040218532.1    | -----                                                    | 2808 |
| <i>Anopheles darlingi</i> ; ETN65512.1        | -----                                                    | 1055 |
| <i>Aedes albopictus</i> ; XP_029723621.1      | -----                                                    | 1616 |
| <i>Drosophila melanogaster</i> ; ABW09325.1   | eaekskeesrresvaeksplaskeasrpasvaesvkddaekskeesrres-----v | 3760 |
| <i>Aedes aegypti</i> ; XP_021710788.1         | na-----etnithasvknedskpasilsqidekalssvkdtparpekepsvtdsq  | 3136 |
| <i>Culex quinquefasciatus</i> ; EDS38616.1    | ke-----saevqiktedketsrpasvashvsekaasek-----s             | 2972 |
| <i>Culex pipiens pallens</i> ; XP_039443854.1 | ke-----saevqiktedkeasrpasvashvsekaasek-----s             | 3088 |

|                                               |                                                              |      |
|-----------------------------------------------|--------------------------------------------------------------|------|
| <i>Anopheles merus</i> ; XP_041782981.1       | -----                                                        | 2806 |
| <i>Anopheles arabiensis</i> ; XP_040172246.1  | -----                                                        | 2808 |
| <i>Anopheles coluzzii</i> ; XP_040218532.1    | -----                                                        | 2808 |
| <i>Anopheles darlingi</i> ; ETN65512.1        | -----                                                        | 1055 |
| <i>Aedes albopictus</i> ; XP_029723621.1      | -----                                                        | 1616 |
| <i>Drosophila melanogaster</i> ; ABW09325.1   | aeksplaskeasrpasvaesvkdeaekskeesrresvaeksplpskeasrptsvaesvkd | 3820 |
| <i>Aedes aegypti</i> ; XP_021710788.1         | cgkeqplkesdsrptsaaashvsekv-----stdktp--ekeesrpasavshvse      | 3183 |
| <i>Culex quinquefasciatus</i> ; EDS38616.1    | atlekpddkepsrpesaashvseka-----asdkakpdekeasrpesvvsqase       | 3021 |
| <i>Culex pipiens pallens</i> ; XP_039443854.1 | vtleksddkelsrpesaashvseka-----asdkakpdekeasrpesvvsqase       | 3137 |

|                                               |                                                           |      |
|-----------------------------------------------|-----------------------------------------------------------|------|
| <i>Anopheles merus</i> ; XP_041782981.1       | -----                                                     | 2806 |
| <i>Anopheles arabiensis</i> ; XP_040172246.1  | -----                                                     | 2808 |
| <i>Anopheles coluzzii</i> ; XP_040218532.1    | -----                                                     | 2808 |
| <i>Anopheles darlingi</i> ; ETN65512.1        | -----                                                     | 1055 |
| <i>Aedes albopictus</i> ; XP_029723621.1      | -----                                                     | 1616 |
| <i>Drosophila melanogaster</i> ; ABW09325.1   | eaekskeesrresvaeksslaskkasrpaesvkdeaekskeesrresvaeksplask | 3880 |
| <i>Aedes aegypti</i> ; XP_021710788.1         | sapsdk-----ldiik---aedkdywrpassashvsekss-----tidavvidqk   | 3225 |
| <i>Culex quinquefasciatus</i> ; EDS38616.1    | kv-----svad---kseekvsrpesqasavdektv-----ektvselqvds       | 3060 |
| <i>Culex pipiens pallens</i> ; XP_039443854.1 | ka-----svad---kseekvsrpesqasavdektv-----ektvselqvds       | 3176 |
|                                               |                                                           |      |
| <i>Anopheles merus</i> ; XP_041782981.1       | -----                                                     | 2806 |
| <i>Anopheles arabiensis</i> ; XP_040172246.1  | -----                                                     | 2808 |
| <i>Anopheles coluzzii</i> ; XP_040218532.1    | -----                                                     | 2808 |
| <i>Anopheles darlingi</i> ; ETN65512.1        | -----                                                     | 1055 |
| <i>Aedes albopictus</i> ; XP_029723621.1      | -----                                                     | 1616 |
| <i>Drosophila melanogaster</i> ; ABW09325.1   | easrpaesvkdeaekskeesrresvaeksplpskeasrptsvaesvkdeadkskees | 3940 |
| <i>Aedes aegypti</i> ; XP_021710788.1         | espapistvsptieqeqkepsrsqs-aasek-----                      | 3255 |
| <i>Culex quinquefasciatus</i> ; EDS38616.1    | ds-rpasaashtsdkaepasekiqv-assekapeqkpeak-----d-----       | 3099 |
| <i>Culex pipiens pallens</i> ; XP_039443854.1 | ds-rpasaashtsdkaepasekiqv-vssektepeqkleak-----d-----      | 3215 |



---

|                                               |                                                              |      |
|-----------------------------------------------|--------------------------------------------------------------|------|
| <i>Anopheles merus</i> ; XP_041782981.1       | -----                                                        | 2806 |
| <i>Anopheles arabiensis</i> ; XP_040172246.1  | -----                                                        | 2808 |
| <i>Anopheles coluzzii</i> ; XP_040218532.1    | -----                                                        | 2808 |
| <i>Anopheles darlingi</i> ; ETN65512.1        | -----                                                        | 1055 |
| <i>Aedes albopictus</i> ; XP_029723621.1      | -----                                                        | 1616 |
| <i>Drosophila melanogaster</i> ; ABW09325.1   | rresgaeksplasmeasrptsvaesvkdetekskeesrresvteksplpskeasrptsva | 4000 |
| <i>Aedes aegypti</i> ; XP_021710788.1         | -----veetsrpvsvasd-----kaktveskaddkeasrptsaa                 | 3289 |
| <i>Culex quinquefasciatus</i> ; EDS38616.1    | ----dkpsaddktsqdrpassashvsk-----eseketarkesiisekeasrptsva    | 3148 |
| <i>Culex pipiens pallens</i> ; XP_039443854.1 | -----dktsqdrpassashvsk-----eseketarkesiisekeasrptsva         | 3258 |

|                                               |                                                             |      |
|-----------------------------------------------|-------------------------------------------------------------|------|
| <i>Anopheles merus</i> ; XP_041782981.1       | -----                                                       | 2806 |
| <i>Anopheles arabiensis</i> ; XP_040172246.1  | -----                                                       | 2808 |
| <i>Anopheles coluzzii</i> ; XP_040218532.1    | -----                                                       | 2808 |
| <i>Anopheles darlingi</i> ; ETN65512.1        | -----                                                       | 1055 |
| <i>Aedes albopictus</i> ; XP_029723621.1      | -----                                                       | 1616 |
| <i>Drosophila melanogaster</i> ; ABW09325.1   | esvkdeaekskeesrresvaeksplaskessrpasvaesikde-----aegtkqesrre | 4054 |
| <i>Aedes aegypti</i> ; XP_021710788.1         | shksekdsh-kaef-----ekdssrpassashasekgsvlqetestkte----       | 3332 |
| <i>Culex quinquefasciatus</i> ; EDS38616.1    | shvsekdaavkves-----ekeasrpassashvse-----                    | 3178 |
| <i>Culex pipiens pallens</i> ; XP_039443854.1 | shvsekdaavkves-----ekeasrpassashvse-----                    | 3288 |

|                                               |                                                              |      |
|-----------------------------------------------|--------------------------------------------------------------|------|
| <i>Anopheles merus</i> ; XP_041782981.1       | -----                                                        | 2806 |
| <i>Anopheles arabiensis</i> ; XP_040172246.1  | -----                                                        | 2808 |
| <i>Anopheles coluzzii</i> ; XP_040218532.1    | -----                                                        | 2808 |
| <i>Anopheles darlingi</i> ; ETN65512.1        | -----                                                        | 1055 |
| <i>Aedes albopictus</i> ; XP_029723621.1      | -----                                                        | 1616 |
| <i>Drosophila melanogaster</i> ; ABW09325.1   | smpesgkaesikgdqsslasketsrpdsvvesvkdetekpegsaidksqvasrpesvavs | 4114 |
| <i>Aedes aegypti</i> ; XP_021710788.1         | emdiav-----kveskddkdpsrsasvashvse-tdkev-----dektqsrpdsaash   | 3379 |
| <i>Culex quinquefasciatus</i> ; EDS38616.1    | -----kedakvpsrpestashvsettdkkv-----nekepsrpesaash            | 3217 |
| <i>Culex pipiens pallens</i> ; XP_039443854.1 | -----kedakvpsrpestashvsettdkkm-----dekepsrpesaash            | 3327 |
|                                               |                                                              |      |
| <i>Anopheles merus</i> ; XP_041782981.1       | -----                                                        | 2806 |
| <i>Anopheles arabiensis</i> ; XP_040172246.1  | -----                                                        | 2808 |
| <i>Anopheles coluzzii</i> ; XP_040218532.1    | -----                                                        | 2808 |
| <i>Anopheles darlingi</i> ; ETN65512.1        | -----                                                        | 1055 |
| <i>Aedes albopictus</i> ; XP_029723621.1      | -----                                                        | 1616 |
| <i>Drosophila melanogaster</i> ; ABW09325.1   | akdeksplhsrpesvadkspdaskeasrslsvaetasspieegprsiadlsplnlgtge- | 4173 |
| <i>Aedes aegypti</i> ; XP_021710788.1         | gpsdksvpkd-----skpddkelslpesttse-----tvakpldassid            | 3418 |
| <i>Culex quinquefasciatus</i> ; EDS38616.1    | apsdkspakd-----lkvdekiasrpesaaes-----vvs---dktsev            | 3253 |
| <i>Culex pipiens pallens</i> ; XP_039443854.1 | apsdkspakd-----lkvdekiasrpesaaes-----vvs---nkasev            | 3363 |

|                                               |                                                               |      |
|-----------------------------------------------|---------------------------------------------------------------|------|
| <i>Anopheles merus</i> ; XP_041782981.1       | -----                                                         | 2806 |
| <i>Anopheles arabiensis</i> ; XP_040172246.1  | -----                                                         | 2808 |
| <i>Anopheles coluzzii</i> ; XP_040218532.1    | -----                                                         | 2808 |
| <i>Anopheles darlingi</i> ; ETN65512.1        | -----                                                         | 1055 |
| <i>Aedes albopictus</i> ; XP_029723621.1      | -----                                                         | 1616 |
| <i>Drosophila melanogaster</i> ; ABW09325.1   | ---akgklptlss-----pidvaegdflevkae-----ssrpavlskpaefsq         | 4214 |
| <i>Aedes aegypti</i> ; XP_021710788.1         | kligegdfsrespascssdkv-epskepkestfvekdllarpdsscsyhgehipdekpfsr | 3477 |
| <i>Culex quinquefasciatus</i> ; EDS38616.1    | kptadgdfsrespascssdkivapskepesgffekdlarrdsndsfhgepipdektfsr   | 3313 |
| <i>Culex pipiens pallens</i> ; XP_039443854.1 | kptadgdfsrespascssdkivapskepesgffekdlarrdsndsfhgepipdektfsr   | 3423 |
|                                               |                                                               |      |
| <i>Anopheles merus</i> ; XP_041782981.1       | -----                                                         | 2806 |
| <i>Anopheles arabiensis</i> ; XP_040172246.1  | -----                                                         | 2808 |
| <i>Anopheles coluzzii</i> ; XP_040218532.1    | -----                                                         | 2808 |
| <i>Anopheles darlingi</i> ; ETN65512.1        | -----                                                         | 1055 |
| <i>Aedes albopictus</i> ; XP_029723621.1      | -----                                                         | 1616 |
| <i>Drosophila melanogaster</i> ; ABW09325.1   | pdgtgtastpvdeaspvleeievveqhttsvgvatgataetdldltetksetvtkqset   | 4274 |
| <i>Aedes aegypti</i> ; XP_021710788.1         | pespds-----caddklnevetqpaekq-----                             | 3500 |
| <i>Culex quinquefasciatus</i> ; EDS38616.1    | pespds-----caedkkeqivetkpetvtkveek                            | 3342 |
| <i>Culex pipiens pallens</i> ; XP_039443854.1 | pespds-----caedkkelivetkpetvtkveek                            | 3452 |

---

|                                               |                                                              |      |
|-----------------------------------------------|--------------------------------------------------------------|------|
| <i>Anopheles merus</i> ; XP_041782981.1       | -----                                                        | 2806 |
| <i>Anopheles arabiensis</i> ; XP_040172246.1  | -----                                                        | 2808 |
| <i>Anopheles coluzzii</i> ; XP_040218532.1    | -----                                                        | 2808 |
| <i>Anopheles darlingi</i> ; ETN65512.1        | -----                                                        | 1055 |
| <i>Aedes albopictus</i> ; XP_029723621.1      | -----                                                        | 1616 |
| <i>Drosophila melanogaster</i> ; ABW09325.1   | tlfetltskveskvevlessvkqveekvqtsvkqaettvtdsleqltkksseqlteiksv | 4334 |
| <i>Aedes aegypti</i> ; XP_021710788.1         | vt-----gdda----vkqvi---dttk--dvkked-----mesp                 | 3525 |
| <i>Culex quinquefasciatus</i> ; EDS38616.1    | it--aseqkvetkea-----iqevkkeqiteskqattseqk-----dvsv           | 3380 |
| <i>Culex pipiens pallens</i> ; XP_039443854.1 | it--aseqkvetkea-----iqevkkeqvteskqattseqk-----dvsv           | 3490 |

|                                               |                                                                |      |
|-----------------------------------------------|----------------------------------------------------------------|------|
| <i>Anopheles merus</i> ; XP_041782981.1       | -----                                                          | 2806 |
| <i>Anopheles arabiensis</i> ; XP_040172246.1  | -----                                                          | 2808 |
| <i>Anopheles coluzzii</i> ; XP_040218532.1    | -----                                                          | 2808 |
| <i>Anopheles darlingi</i> ; ETN65512.1        | -----                                                          | 1055 |
| <i>Aedes albopictus</i> ; XP_029723621.1      | -----                                                          | 1616 |
| <i>Drosophila melanogaster</i> ; ABW09325.1   | ldtnfeevakivadvakvlksdkditdi-----ipdfd-----erqle               | 4372 |
| <i>Aedes aegypti</i> ; XP_021710788.1         | evkefsrp-----dspascgdeteltsktpessipekhlaredsvqsyhgpipeekqfs    | 3580 |
| <i>Culex quinquefasciatus</i> ; EDS38616.1    | eekdfrsp-----dspascgdekeltsskapessvpekdlarpdsaaasyhgpipegekqfs | 3435 |
| <i>Culex pipiens pallens</i> ; XP_039443854.1 | eekdfrsp-----dspascgdekeltsskapessvpekdlarpdsaaasyhgpipegekqfs | 3545 |

---

|                                               |                                                              |      |
|-----------------------------------------------|--------------------------------------------------------------|------|
| <i>Anopheles merus</i> ; XP_041782981.1       | -----                                                        | 2806 |
| <i>Anopheles arabiensis</i> ; XP_040172246.1  | -----                                                        | 2808 |
| <i>Anopheles coluzzii</i> ; XP_040218532.1    | -----                                                        | 2808 |
| <i>Anopheles darlingi</i> ; ETN65512.1        | -----                                                        | 1055 |
| <i>Aedes albopictus</i> ; XP_029723621.1      | -----                                                        | 1616 |
| <i>Drosophila melanogaster</i> ; ABW09325.1   | eklkstadteee---sdkstrdeksl-----eiskveieseksspdq              | 4412 |
| <i>Aedes aegypti</i> ; XP_021710788.1         | rpds pasggedetpapvkv-----skessrpesaashisgkd                  | 3617 |
| <i>Culex quinquefasciatus</i> ; EDS38616.1    | rpaspasctedepaeaekvsrpesavshvsekdsksqdeskdvkaesrpesvashvsekd | 3495 |
| <i>Culex pipiens pallens</i> ; XP_039443854.1 | rpaspasctedepteaekvsrpesavshvsekdsqpdeskdvkaesrpesvashvsekd  | 3605 |
|                                               |                                                              |      |
| <i>Anopheles merus</i> ; XP_041782981.1       | -----                                                        | 2806 |
| <i>Anopheles arabiensis</i> ; XP_040172246.1  | -----                                                        | 2808 |
| <i>Anopheles coluzzii</i> ; XP_040218532.1    | -----                                                        | 2808 |
| <i>Anopheles darlingi</i> ; ETN65512.1        | -----                                                        | 1055 |
| <i>Aedes albopictus</i> ; XP_029723621.1      | -----                                                        | 1616 |
| <i>Drosophila melanogaster</i> ; ABW09325.1   | ksgpisieekdkieqsekaqlrqgiltssrpesvasq-----pesv               | 4453 |
| <i>Aedes aegypti</i> ; XP_021710788.1         | ks-pvgseakes-----l-----                                      | 3629 |
| <i>Culex quinquefasciatus</i> ; EDS38616.1    | skspapveakev-----keasrpesvshvsekdtkpqeeskdtkesrpesv          | 3542 |
| <i>Culex pipiens pallens</i> ; XP_039443854.1 | skspapveakev-----keasrpesvshvsekdtksqeeskdtkesrpesv          | 3652 |

---

|                                               |                                                               |      |
|-----------------------------------------------|---------------------------------------------------------------|------|
| <i>Anopheles merus</i> ; XP_041782981.1       | -----                                                         | 2806 |
| <i>Anopheles arabiensis</i> ; XP_040172246.1  | -----                                                         | 2808 |
| <i>Anopheles coluzzii</i> ; XP_040218532.1    | -----                                                         | 2808 |
| <i>Anopheles darlingi</i> ; ETN65512.1        | -----                                                         | 1055 |
| <i>Aedes albopictus</i> ; XP_029723621.1      | -----                                                         | 1616 |
| <i>Drosophila melanogaster</i> ; ABW09325.1   | pspsqsaashehkevelseshkaekssrpesvasqvsekdmkts-----rpass        | 4503 |
| <i>Aedes aegypti</i> ; XP_021710788.1         | --tl-----nekdt-----rptsaa                                     | 3643 |
| <i>Culex quinquefasciatus</i> ; EDS38616.1    | ashvs---ekdskspapveskevkdas-----rpesva                        | 3572 |
| <i>Culex pipiens pallens</i> ; XP_039443854.1 | ashvs---ekdskspaavestvakeasrpesvashvsekdtksqeeskdtkttesrpesva | 3709 |

|                                               |                                                             |      |
|-----------------------------------------------|-------------------------------------------------------------|------|
| <i>Anopheles merus</i> ; XP_041782981.1       | -----                                                       | 2806 |
| <i>Anopheles arabiensis</i> ; XP_040172246.1  | -----                                                       | 2808 |
| <i>Anopheles coluzzii</i> ; XP_040218532.1    | -----                                                       | 2808 |
| <i>Anopheles darlingi</i> ; ETN65512.1        | -----                                                       | 1055 |
| <i>Aedes albopictus</i> ; XP_029723621.1      | -----                                                       | 1616 |
| <i>Drosophila melanogaster</i> ; ABW09325.1   | sqfstkegdeettes----llhslttt--etvetk-----qmeekssfesvstsvtk   | 4549 |
| <i>Aedes aegypti</i> ; XP_021710788.1         | shasdksgatea-----kmes-----                                  | 3659 |
| <i>Culex quinquefasciatus</i> ; EDS38616.1    | shvsekdkssaqqddtkdtkaqsrpesaashvsekdkspadkpkseesrpesaishv-- | 3630 |
| <i>Culex pipiens pallens</i> ; XP_039443854.1 | shvsekdkssaqqddtkdtkaqsrpesaashvsekdkspadkpkseasrpesaashv-- | 3767 |

---

|                                               |                                                              |      |
|-----------------------------------------------|--------------------------------------------------------------|------|
| <i>Anopheles merus</i> ; XP_041782981.1       | -----                                                        | 2806 |
| <i>Anopheles arabiensis</i> ; XP_040172246.1  | -----                                                        | 2808 |
| <i>Anopheles coluzzii</i> ; XP_040218532.1    | -----                                                        | 2808 |
| <i>Anopheles darlingi</i> ; ETN65512.1        | -----                                                        | 1055 |
| <i>Aedes albopictus</i> ; XP_029723621.1      | -----                                                        | 1616 |
| <i>Drosophila melanogaster</i> ; ABW09325.1   | stvlssqstvqlreestsesslss-----slkvedssrreslssllaek---ggia-t-n | 4598 |
| <i>Aedes aegypti</i> ; XP_021710788.1         | ---rresatqeerpss--salsdhadnaqeekifmkesrskslsavmsstpqrigfegsa | 3713 |
| <i>Culex quinquefasciatus</i> ; EDS38616.1    | ----seksvdsqrres--aalsdhed--eaekvvmketrskslsavmatttqrsgfegsa | 3682 |
| <i>Culex pipiens pallens</i> ; XP_039443854.1 | ----seksvdsqrres--aalsdhed--eaekvvmketrskslsavmatttqrsgfegsa | 3819 |

|                                               |                                                               |      |
|-----------------------------------------------|---------------------------------------------------------------|------|
| <i>Anopheles merus</i> ; XP_041782981.1       | -----                                                         | 2806 |
| <i>Anopheles arabiensis</i> ; XP_040172246.1  | -----                                                         | 2808 |
| <i>Anopheles coluzzii</i> ; XP_040218532.1    | -----                                                         | 2808 |
| <i>Anopheles darlingi</i> ; ETN65512.1        | -----                                                         | 1055 |
| <i>Aedes albopictus</i> ; XP_029723621.1      | -----                                                         | 1616 |
| <i>Drosophila melanogaster</i> ; ABW09325.1   | ts-lkedtsasasqleellvqseecsse---sivseiqtisiaqksnkeikda-----ret | 4649 |
| <i>Aedes aegypti</i> ; XP_021710788.1         | lgvleesaatsrddlhilktpresitkieemaftekkqfttasktgmslfgpsqfppter  | 3773 |
| <i>Culex quinquefasciatus</i> ; EDS38616.1    | lgvleetmvtsrddlhvlktpresitkieplse-----kieskagmslfgaeqfpadgk   | 3736 |
| <i>Culex pipiens pallens</i> ; XP_039443854.1 | lgvleetmvtsrddlhvlktpresitkieplse-----kieskagmslfgaeqfpadgk   | 3873 |

|                                               |                                                              |      |
|-----------------------------------------------|--------------------------------------------------------------|------|
| <i>Anopheles merus</i> ; XP_041782981.1       | -----                                                        | 2806 |
| <i>Anopheles arabiensis</i> ; XP_040172246.1  | -----                                                        | 2808 |
| <i>Anopheles coluzzii</i> ; XP_040218532.1    | -----                                                        | 2808 |
| <i>Anopheles darlingi</i> ; ETN65512.1        | -----                                                        | 1055 |
| <i>Aedes albopictus</i> ; XP_029723621.1      | -----                                                        | 1616 |
| <i>Drosophila melanogaster</i> ; ABW09325.1   | kvtsqfttts---s-----atkddslketvaeflatekivsakeafsteatksadd     | 4698 |
| <i>Aedes aegypti</i> ; XP_021710788.1         | keaegfpiagaehespdqtdtiipgvdqllketassmkeiekmsss-----          | 3819 |
| <i>Culex quinquefasciatus</i> ; EDS38616.1    | ketngfpvvglehespdetdsiipgvdvllketvssmkeiekmsts-----          | 3782 |
| <i>Culex pipiens pallens</i> ; XP_039443854.1 | ketngfpvvglehespdetdsiipgvdvllketvssmkeiekmsts-----          | 3919 |
|                                               |                                                              |      |
| <i>Anopheles merus</i> ; XP_041782981.1       | -----                                                        | 2806 |
| <i>Anopheles arabiensis</i> ; XP_040172246.1  | -----                                                        | 2808 |
| <i>Anopheles coluzzii</i> ; XP_040218532.1    | -----                                                        | 2808 |
| <i>Anopheles darlingi</i> ; ETN65512.1        | -----                                                        | 1055 |
| <i>Aedes albopictus</i> ; XP_029723621.1      | -----                                                        | 1616 |
| <i>Drosophila melanogaster</i> ; ABW09325.1   | clkkttasavsstsasqralfvgtdesrresllsq-asesrlt--hsdpedeepaddvde | 4755 |
| <i>Aedes aegypti</i> ; XP_021710788.1         | -----vi-----tmiqttekkdesikqesk-sstlafplldsgkstpmgsge--       | 3859 |
| <i>Culex quinquefasciatus</i> ; EDS38616.1    | -----vi-----smiktsekkdetvkieeksastlsfpplldsgkstpmstd--       | 3823 |
| <i>Culex pipiens pallens</i> ; XP_039443854.1 | -----vi-----smiktsekkdetvkieeksastlsfpplldsgkstpmstd--       | 3960 |



---

|                                               |                                                             |      |
|-----------------------------------------------|-------------------------------------------------------------|------|
| <i>Anopheles merus</i> ; XP_041782981.1       | -----                                                       | 2806 |
| <i>Anopheles arabiensis</i> ; XP_040172246.1  | -----                                                       | 2808 |
| <i>Anopheles coluzzii</i> ; XP_040218532.1    | -----                                                       | 2808 |
| <i>Anopheles darlingi</i> ; ETN65512.1        | -----                                                       | 1055 |
| <i>Aedes albopictus</i> ; XP_029723621.1      | -----                                                       | 1616 |
| <i>Drosophila melanogaster</i> ; ABW09325.1   | rssvkesrsksiatimmtsikykpsemepisklveeehehveelaqevtstskttllqs | 4815 |
| <i>Aedes aegypti</i> ; XP_021710788.1         | -----kdksqt-----ssikstspdhkdslegss-----a-slntfiek           | 3892 |
| <i>Culex quinquefasciatus</i> ; EDS38616.1    | -----kdksqa-----ssiksvsphekdsldgss-----a-slntfiek           | 3856 |
| <i>Culex pipiens pallens</i> ; XP_039443854.1 | -----kdksqa-----ssiksvsphekdsldgss-----a-slntfiek           | 3993 |
|                                               |                                                             |      |
| <i>Anopheles merus</i> ; XP_041782981.1       | -----                                                       | 2806 |
| <i>Anopheles arabiensis</i> ; XP_040172246.1  | -----                                                       | 2808 |
| <i>Anopheles coluzzii</i> ; XP_040218532.1    | -----                                                       | 2808 |
| <i>Anopheles darlingi</i> ; ETN65512.1        | -----                                                       | 1055 |
| <i>Aedes albopictus</i> ; XP_029723621.1      | -----                                                       | 1616 |
| <i>Drosophila melanogaster</i> ; ABW09325.1   | seqssttsstsktgasrvesitltqmd--qqtsqsgdpadrktpptapvspgvkamss  | 4873 |
| <i>Aedes aegypti</i> ; XP_021710788.1         | dslse-stskqvtikmsaveeiadlksmttstkvectellggsktptapispnvakedc | 3951 |
| <i>Culex quinquefasciatus</i> ; EDS38616.1    | dslse-sttkhvtikmstveeigct-tvttgskaegsellgaktptapispnvredf   | 3914 |
| <i>Culex pipiens pallens</i> ; XP_039443854.1 | dslse-sttkhvtikmstveeigct-tvttgskaegsellgaktptapispnvredf   | 4051 |

|                                               |                                                               |      |
|-----------------------------------------------|---------------------------------------------------------------|------|
| <i>Anopheles merus</i> ; XP_041782981.1       | -----                                                         | 2806 |
| <i>Anopheles arabiensis</i> ; XP_040172246.1  | -----                                                         | 2808 |
| <i>Anopheles coluzzii</i> ; XP_040218532.1    | -----                                                         | 2808 |
| <i>Anopheles darlingi</i> ; ETN65512.1        | -----                                                         | 1055 |
| <i>Aedes albopictus</i> ; XP_029723621.1      | -----                                                         | 1616 |
| <i>Drosophila melanogaster</i> ; ABW09325.1   | tg-----sagsvigagagavaaggkcessaasivssgpmsp--kdisgksspgal       | 4922 |
| <i>Aedes aegypti</i> ; XP_021710788.1         | tlgqhiestvttsisattgtss---sqgivkqk-k---edvsgistpkesvpsgksspglm | 4004 |
| <i>Culex quinquefasciatus</i> ; EDS38616.1    | slghqlessststttitsssqqlvggskqk-k---edvsgistpkesvpsgksspglm    | 3970 |
| <i>Culex pipiens pallens</i> ; XP_039443854.1 | slghqlessststttitsssqqlvggikqk-k---edvsgistpkesvpsgksspglm    | 4107 |
|                                               |                                                               |      |
| <i>Anopheles merus</i> ; XP_041782981.1       | -----                                                         | 2806 |
| <i>Anopheles arabiensis</i> ; XP_040172246.1  | -----                                                         | 2808 |
| <i>Anopheles coluzzii</i> ; XP_040218532.1    | -----                                                         | 2808 |
| <i>Anopheles darlingi</i> ; ETN65512.1        | -----                                                         | 1055 |
| <i>Aedes albopictus</i> ; XP_029723621.1      | -----                                                         | 1616 |
| <i>Drosophila melanogaster</i> ; ABW09325.1   | tse-----sqsiptplgreshdtpeesspkptspfprvskdelkslem-----q        | 4966 |
| <i>Aedes aegypti</i> ; XP_021710788.1         | svhtgstdsasksinlghssgietsesspkptspfklldtl-ktdevktssgmstpdmt   | 4063 |
| <i>Culex quinquefasciatus</i> ; EDS38616.1    | svhtgstdsasksinlghssgietsesspkptspfkvvdtl-ktdevktssgmstpdmt   | 4029 |
| <i>Culex pipiens pallens</i> ; XP_039443854.1 | svhtgstdsasksinlghssgietsesspkptspfkvvdtl-ktdevktssgmstpdmt   | 4166 |

---

|                                               |                                                          |      |
|-----------------------------------------------|----------------------------------------------------------|------|
| <i>Anopheles merus</i> ; XP_041782981.1       | -----                                                    | 2806 |
| <i>Anopheles arabiensis</i> ; XP_040172246.1  | -----                                                    | 2808 |
| <i>Anopheles coluzzii</i> ; XP_040218532.1    | -----                                                    | 2808 |
| <i>Anopheles darlingi</i> ; ETN65512.1        | -----                                                    | 1055 |
| <i>Aedes albopictus</i> ; XP_029723621.1      | -----                                                    | 1616 |
| <i>Drosophila melanogaster</i> ; ABW09325.1   | hhsqeqmlagaaaagaecgdipelhelrglecttalsgstdkiittttvtkvisad | 5026 |
| <i>Aedes aegypti</i> ; XP_021710788.1         | rtstpdmvdsqie-----ripedt-----keevkqdvitttttttkryikd      | 4105 |
| <i>Culex quinquefasciatus</i> ; EDS38616.1    | rtstpdmvdsqie-----rvpedk-----agggesvtttttttkryivkd       | 4071 |
| <i>Culex pipiens pallens</i> ; XP_039443854.1 | rtstpdmvdsqie-----rvpedk-----agggesvtttttttkryivkd       | 4208 |

|                                               |                                                             |      |
|-----------------------------------------------|-------------------------------------------------------------|------|
| <i>Anopheles merus</i> ; XP_041782981.1       | -----                                                       | 2806 |
| <i>Anopheles arabiensis</i> ; XP_040172246.1  | -----                                                       | 2808 |
| <i>Anopheles coluzzii</i> ; XP_040218532.1    | -----                                                       | 2808 |
| <i>Anopheles darlingi</i> ; ETN65512.1        | -----                                                       | 1055 |
| <i>Aedes albopictus</i> ; XP_029723621.1      | -----                                                       | 1616 |
| <i>Drosophila melanogaster</i> ; ABW09325.1   | gkeivteqktv--tttd-----ssepdkv----vttt---                    | 5055 |
| <i>Aedes aegypti</i> ; XP_021710788.1         | gekievgstvktevsgdskddtssagesmststtttttkvvkaiktpinltlatte    | 4165 |
| <i>Culex quinquefasciatus</i> ; EDS38616.1    | gekievgstvktevadttdkddas---esmstssvtittgkptkevvtgpgiltlsste | 4128 |
| <i>Culex pipiens pallens</i> ; XP_039443854.1 | gekievgstvktevadttdkddas---esmstssvtittgkptkevvtgpgiltlsste | 4265 |

|                                               |                                                               |      |
|-----------------------------------------------|---------------------------------------------------------------|------|
| <i>Anopheles merus</i> ; XP_041782981.1       | -----                                                         | 2806 |
| <i>Anopheles arabiensis</i> ; XP_040172246.1  | -----                                                         | 2808 |
| <i>Anopheles coluzzii</i> ; XP_040218532.1    | -----                                                         | 2808 |
| <i>Anopheles darlingi</i> ; ETN65512.1        | -----                                                         | 1055 |
| <i>Aedes albopictus</i> ; XP_029723621.1      | -----                                                         | 1616 |
| <i>Drosophila melanogaster</i> ; ABW09325.1   | -rtts--eserdqllp-----kevallrglyrastpgse---ddedlllgsprsaty     | 5102 |
| <i>Aedes aegypti</i> ; XP_021710788.1         | drsltedydekdvmsprsdissgqasrivagwhdedvpgspmsvtsqaplspstkytydy  | 4225 |
| <i>Culex quinquefasciatus</i> ; EDS38616.1    | drsfadfdkeamsprsdissgqasrivagwhdedvpgspmsvtsqaplspstkytydy    | 4188 |
| <i>Culex pipiens pallens</i> ; XP_039443854.1 | drsfadfdkeamsprsdissgqasrivagwhdedvpgspmsvtsqaplspstkytydy    | 4325 |
|                                               |                                                               |      |
| <i>Anopheles merus</i> ; XP_041782981.1       | -----                                                         | 2806 |
| <i>Anopheles arabiensis</i> ; XP_040172246.1  | -----                                                         | 2808 |
| <i>Anopheles coluzzii</i> ; XP_040218532.1    | -----                                                         | 2808 |
| <i>Anopheles darlingi</i> ; ETN65512.1        | -----                                                         | 1055 |
| <i>Aedes albopictus</i> ; XP_029723621.1      | -----                                                         | 1616 |
| <i>Drosophila melanogaster</i> ; ABW09325.1   | elqhsssgvskrsldadgdesqddippqygseehstarsillprtadpmatsfygalpd   | 5162 |
| <i>Aedes aegypti</i> ; XP_021710788.1         | dlqhsssgvskksdiei--ddsqdeippqygsdevksaitiasafkpdpmstsfyggqlpd | 4283 |
| <i>Culex quinquefasciatus</i> ; EDS38616.1    | dlqhsssgvskksdiei--ddsqdeippqygsdevksaitiasaykpdpmstsfyggqlpd | 4246 |
| <i>Culex pipiens pallens</i> ; XP_039443854.1 | dlqhsssgvskksdiei--ddsqdeippqygsdevksaitiasaykpdpmstsfyggqlpd | 4383 |

|                                               |                                                                 |      |
|-----------------------------------------------|-----------------------------------------------------------------|------|
| <i>Anopheles merus</i> ; XP_041782981.1       | -----                                                           | 2806 |
| <i>Anopheles arabiensis</i> ; XP_040172246.1  | -----                                                           | 2808 |
| <i>Anopheles coluzzii</i> ; XP_040218532.1    | -----                                                           | 2808 |
| <i>Anopheles darlingi</i> ; ETN65512.1        | -----                                                           | 1055 |
| <i>Aedes albopictus</i> ; XP_029723621.1      | -----                                                           | 1616 |
| <i>Drosophila melanogaster</i> ; ABW09325.1   | sfdvvmkp----stepipiqga-----psgdsqssesvessqtwaghkfl              | 5204 |
| <i>Aedes aegypti</i> ; XP_021710788.1         | vsdtavttsvtstksvpipit--tgkaftktymeyassgdssvdsshik---sadrkyl4338 |      |
| <i>Culex quinquefasciatus</i> ; EDS38616.1    | isdstp-vgitasksvpipisapgkaafaktymeyassgessvdsshqhhtissdrkyl     | 4305 |
| <i>Culex pipiens pallens</i> ; XP_039443854.1 | isdstp-vgttasksvpipisapgkaafaktymeyassgessvdsshqhhtissdrkyl     | 4442 |
|                                               |                                                                 |      |
| <i>Anopheles merus</i> ; XP_041782981.1       | -----                                                           | 2806 |
| <i>Anopheles arabiensis</i> ; XP_040172246.1  | -----                                                           | 2808 |
| <i>Anopheles coluzzii</i> ; XP_040218532.1    | -----                                                           | 2808 |
| <i>Anopheles darlingi</i> ; ETN65512.1        | -----                                                           | 1055 |
| <i>Aedes albopictus</i> ; XP_029723621.1      | -----                                                           | 1616 |
| <i>Drosophila melanogaster</i> ; ABW09325.1   | dqadkdfqraleehvqargaevmssvtakysyspsk-----aeemeqivsgtaerq        | 5255 |
| <i>Aedes aegypti</i> ; XP_021710788.1         | deadldfekaftksdkv---dlmtq---smhfssekefmaattttssamttvadsskkel    | 4392 |
| <i>Culex quinquefasciatus</i> ; EDS38616.1    | deadmdfekt-fak---a---dlmtt---smhfssekefmaat-----tiadsskkel4348  |      |
| <i>Culex pipiens pallens</i> ; XP_039443854.1 | deadmdfekt-fak---a---dlmtt---smhfssekefmaat-----tiadsskkel      | 4485 |

---

|                                               |                                                              |      |
|-----------------------------------------------|--------------------------------------------------------------|------|
| <i>Anopheles merus</i> ; XP_041782981.1       | -----                                                        | 2806 |
| <i>Anopheles arabiensis</i> ; XP_040172246.1  | -----                                                        | 2808 |
| <i>Anopheles coluzzii</i> ; XP_040218532.1    | -----                                                        | 2808 |
| <i>Anopheles darlingi</i> ; ETN65512.1        | -----                                                        | 1055 |
| <i>Aedes albopictus</i> ; XP_029723621.1      | -----                                                        | 1616 |
| <i>Drosophila melanogaster</i> ; ABW09325.1   | rfplsdvqrarvaesgfatvgsvasqqqqekggeveqavptttavtasttatasstgal  | 5315 |
| <i>Aedes aegypti</i> ; XP_021710788.1         | df-----tasglpttisasqaqtlttt-aqss----ttattsgtsqqsqsdk         | 4436 |
| <i>Culex quinquefasciatus</i> ; EDS38616.1    | df-----tasglpstattsttaqsttq-qsssssststvtvtsttssstsq          | 4397 |
| <i>Culex pipiens pallens</i> ; XP_039443854.1 | df-----tasglpstattsttaqsttq-qsssssststvt-----tstsq           | 4528 |
|                                               |                                                              |      |
| <i>Anopheles merus</i> ; XP_041782981.1       | -----                                                        | 2806 |
| <i>Anopheles arabiensis</i> ; XP_040172246.1  | -----                                                        | 2808 |
| <i>Anopheles coluzzii</i> ; XP_040218532.1    | -----                                                        | 2808 |
| <i>Anopheles darlingi</i> ; ETN65512.1        | -----                                                        | 1055 |
| <i>Aedes albopictus</i> ; XP_029723621.1      | -----                                                        | 1616 |
| <i>Drosophila melanogaster</i> ; ABW09325.1   | pkdrleewgkplglpspaplpveggadirttpkkerrlvatctrlnneknlrrespnk   | 5375 |
| <i>Aedes aegypti</i> ; XP_021710788.1         | dkdplaswgkplglpspaplnd---enmkttpkrerkmilsktklnneknlrkrsespik | 4493 |
| <i>Culex quinquefasciatus</i> ; EDS38616.1    | pqdplaswgkplglpspaplnd---dn-kttpkerrtlisktklnneknlrkrsespik  | 4453 |
| <i>Culex pipiens pallens</i> ; XP_039443854.1 | pqdplaswgkplglpspaplnd---dn-kttpkerrtlisktklnneknlrkrsespik  | 4584 |

---

|                                               |                                                            |      |
|-----------------------------------------------|------------------------------------------------------------|------|
| <i>Anopheles merus</i> ; XP_041782981.1       | -----                                                      | 2806 |
| <i>Anopheles arabiensis</i> ; XP_040172246.1  | -----                                                      | 2808 |
| <i>Anopheles coluzzii</i> ; XP_040218532.1    | -----                                                      | 2808 |
| <i>Anopheles darlingi</i> ; ETN65512.1        | -----                                                      | 1055 |
| <i>Aedes albopictus</i> ; XP_029723621.1      | -----                                                      | 1616 |
| <i>Drosophila melanogaster</i> ; ABW09325.1   | agkk--papvyvdltyvphngnsyyahvdfkvraryyvfsgtepsrqvydalleakqt | 5433 |
| <i>Aedes aegypti</i> ; XP_021710788.1         | sakr--papvyvdlsvphhgnsyyanveffkrvaryyvfsgtepsrevynalleakqt | 4551 |
| <i>Culex quinquefasciatus</i> ; EDS38616.1    | gakktpapvyvdlsvphhgnsyyanveffkrvaryyvfsgtepsrevynalleakqt  | 4513 |
| <i>Culex pipiens pallens</i> ; XP_039443854.1 | gakktpapvyvdlsvphhgnsyyanveffkrvaryyvfsgtepsrevynalleakqt  | 4644 |
|                                               |                                                            |      |
| <i>Anopheles merus</i> ; XP_041782981.1       | -----                                                      | 2806 |
| <i>Anopheles arabiensis</i> ; XP_040172246.1  | -----                                                      | 2808 |
| <i>Anopheles coluzzii</i> ; XP_040218532.1    | -----                                                      | 2808 |
| <i>Anopheles darlingi</i> ; ETN65512.1        | -----                                                      | 1055 |
| <i>Aedes albopictus</i> ; XP_029723621.1      | -----                                                      | 1616 |
| <i>Drosophila melanogaster</i> ; ABW09325.1   | wedkelevtiptydtdvlgYWvaeneellakhridlspasrctinlqdhetscsayrl | 5493 |
| <i>Aedes aegypti</i> ; XP_021710788.1         | wedkelevtiptydtdvlgYWwsenedllakyhidlspaarctinlqdhetscsayrl | 4611 |
| <i>Culex quinquefasciatus</i> ; EDS38616.1    | wedkdlevtiptydtdvlgYWwsenedllakyhidlspaarctinlqdhetscsayrl | 4573 |
| <i>Culex pipiens pallens</i> ; XP_039443854.1 | wedkdlevtiptydtdvlgYWwsenedllakyhidlspaarctinlqdhetscsayrl | 4704 |

---

|                                               |    |      |
|-----------------------------------------------|----|------|
| <i>Anopheles merus</i> ; XP_041782981.1       | -- | 2806 |
| <i>Anopheles arabiensis</i> ; XP_040172246.1  | -- | 2808 |
| <i>Anopheles coluzzii</i> ; XP_040218532.1    | -- | 2808 |
| <i>Anopheles darlingi</i> ; ETN65512.1        | -- | 1055 |
| <i>Aedes albopictus</i> ; XP_029723621.1      | -- | 1616 |
| <i>Drosophila melanogaster</i> ; ABW09325.1   | ef | 5495 |
| <i>Aedes aegypti</i> ; XP_021710788.1         | ef | 4613 |
| <i>Culex quinquefasciatus</i> ; EDS38616.1    | ef | 4575 |
| <i>Culex pipiens pallens</i> ; XP_039443854.1 | ef | 4706 |



| <b>Percent Identity Matrix for futsch</b>     | <i>Anopheles merus</i> ; XP_041782981.1 | <i>Anopheles arabiensis</i> ; XP_040172246.1 | <i>Anopheles coluzzii</i> ; XP_040218532.1 | <i>Anopheles darlingi</i> ; ETN65512.1 | <i>Aedes albopictus</i> ; XP_029723621.1 | <i>Drosophila melanogaster</i> ; ABW09325.1 | <i>Aedes aegypti</i> ; XP_021710788.1 | <i>Culex quinquefasciatus</i> ; EDS38616.1 | <i>Culex pipiens pallens</i> ; XP_039443854.1 |
|-----------------------------------------------|-----------------------------------------|----------------------------------------------|--------------------------------------------|----------------------------------------|------------------------------------------|---------------------------------------------|---------------------------------------|--------------------------------------------|-----------------------------------------------|
| <i>Anopheles merus</i> ; XP_041782981.1       | 100.00                                  | 95.04                                        | 95.18                                      | 16.82                                  | 17.21                                    | 19.97                                       | 19.93                                 | 21.07                                      | 21.14                                         |
| <i>Anopheles arabiensis</i> ; XP_040172246.1  | 95.04                                   | 100.00                                       | 96.76                                      | 17.03                                  | 16.72                                    | 19.36                                       | 19.19                                 | 20.49                                      | 20.59                                         |
| <i>Anopheles coluzzii</i> ; XP_040218532.1    | 95.18                                   | 96.76                                        | 100.00                                     | 16.77                                  | 16.56                                    | 19.11                                       | 19.25                                 | 20.21                                      | 20.32                                         |
| <i>Anopheles darlingi</i> ; ETN65512.1        | 16.82                                   | 17.03                                        | 16.77                                      | 100.00                                 | 16.02                                    | 19.70                                       | 20.41                                 | 21.84                                      | 22.30                                         |
| <i>Aedes albopictus</i> ; XP_029723621.1      | 17.21                                   | 16.72                                        | 16.56                                      | 16.02                                  | 100.00                                   | 20.15                                       | 19.78                                 | 19.60                                      | 19.48                                         |
| <i>Drosophila melanogaster</i> ; ABW09325.1   | 19.97                                   | 19.36                                        | 19.11                                      | 19.70                                  | 20.15                                    | 100.00                                      | 39.18                                 | 40.49                                      | 41.10                                         |
| <i>Aedes aegypti</i> ; XP_021710788.1         | 19.93                                   | 19.19                                        | 19.25                                      | 20.41                                  | 19.78                                    | 39.18                                       | 100.00                                | 69.14                                      | 69.23                                         |
| <i>Culex quinquefasciatus</i> ; EDS38616.1    | 21.07                                   | 20.49                                        | 20.21                                      | 21.84                                  | 19.60                                    | 40.49                                       | 69.14                                 | 100.00                                     | 98.50                                         |
| <i>Culex pipiens pallens</i> ; XP_039443854.1 | 21.14                                   | 20.59                                        | 20.32                                      | 22.30                                  | 19.48                                    | 41.10                                       | 69.23                                 | 98.50                                      | 100.00                                        |

S1.4. Multiple sequence alignment for gephyrin (Gene ID: 10243)

|                                               |                                                                        |     |
|-----------------------------------------------|------------------------------------------------------------------------|-----|
| <i>Homo sapiens</i> ; NP_001364448.1          | mategmiltnhdhqirvgvltvsdscfrnlaedrsginlkdlvqdpsslpggtisaykivp          | 60  |
| <i>Drosophila melanogaster</i> ; P39205.3     | -----Mesitfgvltisdtcwqepekdtsgpilrqliget--fantqvignivp                 | 47  |
| <i>Culex quinquefasciatus</i> ; EDS42142.1    | -----Mmkfsvitvsdscsngtatdtsgphlvslvkek--ldatdvnylvvp                   | 45  |
| <i>Culex pipiens pallens</i> ; XP_039440701.1 | -----mqtndivtsdscsngtatdtsgphlvslvkek--ldatdvnylvvp                    | 44  |
| <i>Anopheles arabiensis</i> ; XP_040156974.1  | -----mfsvitvsdscaagkatdtsgphlvlikqs--lktdtnvnyllip                     | 43  |
| <i>Anopheles darlingi</i> ; ETN60700.1        | -----mfyvitidscsageakdtsgpllvgliket--lktesvnyllvp                      | 43  |
|                                               | .:***.*          * ** * *.: :          ..*                             |     |
| <i>Homo sapiens</i> ; NP_001364448.1          | deieeiketlidwcdekelnlilttggtgfaprdvtpekfptpfpcglqkgatkeviere           | 120 |
| <i>Drosophila melanogaster</i> ; P39205.3     | dekdiqqelrkwidreelrvilttggtgfaprdvtpe-----atrqlleke                    | 94  |
| <i>Culex quinquefasciatus</i> ; EDS42142.1    | deadviklliyqcdvkvravfttggtgfalrdvtpe-----atravltke                     | 92  |
| <i>Culex pipiens pallens</i> ; XP_039440701.1 | deadviklliyqcdvkvravfttggtgfaprdvtpe-----atravltke                     | 91  |
| <i>Anopheles arabiensis</i> ; XP_040156974.1  | deedlikqsllyacdvlkvravfttggtgfaprdvtpe-----atraiitke                   | 90  |
| <i>Anopheles darlingi</i> ; ETN60700.1        | derdlieksllyacdvlkvravfttggtgfaprdvtpe-----atravitke                   | 90  |
|                                               | ** : *.. *          *   .. ..***** *****          **.. :.*             |     |
| <i>Homo sapiens</i> ; NP_001364448.1          | apgmalamlmgslnvtplgmrsrpvcgirkltiinlpgskkgsqecfqfilpalphaid            | 180 |
| <i>Drosophila melanogaster</i> ; P39205.3     | cpqlsmyitlesikqtqyaalsrglcgiagntliinlpgsekavkecfqtisallphavh           | 154 |
| <i>Culex quinquefasciatus</i> ; EDS42142.1    | apqltmamtltslektkfavlsvravcgvrektlivnfpgskkavdecfhsivnviphilq          | 152 |
| <i>Culex pipiens pallens</i> ; XP_039440701.1 | apqltmamtltslektkfavlsvravcgvrektlivnfpgskkavdecfhsivnviphilq          | 151 |
| <i>Anopheles arabiensis</i> ; XP_040156974.1  | apqltlamtlcslektkfavlsvravcgvrnktlvnfpgskkavgecfqsivdvlphlln           | 150 |
| <i>Anopheles darlingi</i> ; ETN60700.1        | apqlslamtlrlektkfavlsvravcgirdrtlivnlpgskkavqecyesivdvlphvln           | 150 |
|                                               | . * ... : . *.. *      . *** .** .  ***.***.*      **.. *      .*** .. |     |

---

|                                               |                                                             |     |
|-----------------------------------------------|-------------------------------------------------------------|-----|
| <i>Homo sapiens</i> ; NP_001364448.1          | llrd-aivkvkevhdeldlpspppplspppttsphkqtedkgvqceeeeeekkdsgvas | 239 |
| <i>Drosophila melanogaster</i> ; P39205.3     | ligd-dvslvrkthaevqgsa-----                                  | 174 |
| <i>Culex quinquefasciatus</i> ; EDS42142.1    | lmad-eipkvkethrkiqsge-----                                  | 172 |
| <i>Culex pipiens pallens</i> ; XP_039440701.1 | lmsd-eipkvkethrkiqsge-----                                  | 171 |
| <i>Anopheles arabiensis</i> ; XP_040156974.1  | llnegeiervrethrvqatgdgvpvq-----                             | 177 |
| <i>Anopheles darlingi</i> ; ETN60700.1        | llsdgeiesvrethrevqqg---ttnt-----                            | 174 |

\*.: : \*..\* ...

|                                               |                                                              |     |
|-----------------------------------------------|--------------------------------------------------------------|-----|
| <i>Homo sapiens</i> ; NP_001364448.1          | tedsssshitaaiiakipdsiisrgvqlprdtaslstpsespraqatsrlstascpt299 |     |
| <i>Drosophila melanogaster</i> ; P39205.3     | ---qks-----hicph                                             | 182 |
| <i>Culex quinquefasciatus</i> ; EDS42142.1    | ---ghv-----hvcph                                             | 180 |
| <i>Culex pipiens pallens</i> ; XP_039440701.1 | ---ghv-----hvcph                                             | 179 |
| <i>Anopheles arabiensis</i> ; XP_040156974.1  | ---evy-----hvcph                                             | 185 |
| <i>Anopheles darlingi</i> ; ETN60700.1        | ---krq-----hvcph                                             | 182 |

\*\*

|                                               |                                                             |     |
|-----------------------------------------------|-------------------------------------------------------------|-----|
| <i>Homo sapiens</i> ; NP_001364448.1          | pkvqsrcsskenilrashesavditkvarrhmspfpltsmdkafitvlemtplgteiin | 359 |
| <i>Drosophila melanogaster</i> ; P39205.3     | k-----tgtgtdsdrnspypmlpvqevlsiifntvqktan----                | 217 |
| <i>Culex quinquefasciatus</i> ; EDS42142.1    | a-----tgkggd-drnspypmlevdaleiimstiatqki----                 | 214 |
| <i>Culex pipiens pallens</i> ; XP_039440701.1 | a-----tgkggd-drnspypmlevdaleiimstiatqki----                 | 213 |
| <i>Anopheles arabiensis</i> ; XP_040156974.1  | a-----tgkggd-drnsfpmidvddalrkiltvpsvqt----                  | 219 |
| <i>Anopheles darlingi</i> ; ETN60700.1        | a-----tgkgsdddrrnspypmisvdealqkilatlpisiet----              | 217 |

. \* \*\*.\*: :... ::

---

|                                               |                                                              |     |
|-----------------------------------------------|--------------------------------------------------------------|-----|
| <i>Homo sapiens</i> ; NP_001364448.1          | yrdgmgrvlaqdv yakdnlppfpasvkdgyavraadpgdriigesqageqptqvm-p   | 418 |
| <i>Drosophila melanogaster</i> ; P39205.3     | -----lnkillemnappvippfraskdgyamkstgfsgrvlgciaagdspnslplae    | 272 |
| <i>Culex quinquefasciatus</i> ; EDS42142.1    | -----pr----kqisrvnippfraskdgyalkssgdkgvkrvgyvaagngiirdyfdi   | 265 |
| <i>Culex pipiens pallens</i> ; XP_039440701.1 | -----pr----kqisrvnippfraskdgyalkssgdkgvkrvgyvaagngiirdyfdi   | 264 |
| <i>Anopheles arabiensis</i> ; XP_040156974.1  | -----ar----kqlsrnippfraskdgyalksiggkgmkkvigiyisagdaivqtnfti  | 270 |
| <i>Anopheles darlingi</i> ; ETN60700.1        | -----tr----pqmsrvnippfraskdgyalksiggkgmkkvigiyiaagdaivrtntfi | 268 |

. : \*.\*\*\* \*.\*\*\*... : :.\* \*\*.

|                                               |                                                               |     |
|-----------------------------------------------|---------------------------------------------------------------|-----|
| <i>Homo sapiens</i> ; NP_001364448.1          | gqvmrvttgapipcgadavvqvvedteliresddgteevrllvqarpqgdirpighdik   | 478 |
| <i>Drosophila melanogaster</i> ; P39205.3     | decykintgaplpleadcvvqvvedtkllqldkngqes-lvdilvepqagldvrpvgydls | 331 |
| <i>Culex quinquefasciatus</i> ; EDS42142.1    | dqcykintgapvpdqadaviqiedtklist-dndiek-iievsspspnldirsigsdlr   | 323 |
| <i>Culex pipiens pallens</i> ; XP_039440701.1 | dqcykintgapvpdqadaviqiedtklist-dndiek-iievsspspnldirsigsdlr   | 322 |
| <i>Anopheles arabiensis</i> ; XP_040156974.1  | decykintgapvpqhadaaiqvvedtklvsr-kndyes-iveilaepsasldirsigsdlr | 328 |
| <i>Anopheles darlingi</i> ; ETN60700.1        | decykintgaplpehadaaiqviedtklir-endyer-mievltdpepsldvraigsdlr  | 326 |

:. :.\*\*\*.\* \*\*..\*.\*.\*.\*. :. \* :.\* . \*.\*.\*.\*.

|                                               |                                                             |     |
|-----------------------------------------------|-------------------------------------------------------------|-----|
| <i>Homo sapiens</i> ; NP_001364448.1          | rgecvlakgthmgpseigllatvgvtevevnkfpvvavmstgnellnpedd-----ll  | 531 |
| <i>Drosophila melanogaster</i> ; P39205.3     | tndrifpaldpspvvksllasvgnrlil--skpkvaivstgselcspnq-----lt    | 382 |
| <i>Culex quinquefasciatus</i> ; EDS42142.1    | mgedvfehrypldaaqrllasigetinv--gqlriavistgdelvhpygdgaq--trti | 379 |
| <i>Culex pipiens pallens</i> ; XP_039440701.1 | mgedvfehrypldaaqrllasigetinv--gqlriavistgdelvhpygdgaq--tgti | 378 |
| <i>Anopheles arabiensis</i> ; XP_040156974.1  | mseevfqyrfpldacqrallaavgekasv--vklkvaistgdellhpydtsaaadassl | 386 |
| <i>Anopheles darlingi</i> ; ETN60700.1        | maeevfryrfpldasqrmlasigekvsl--vklkvailstgdellhpydaipa--egsl | 382 |

:. :.\*\*\*.\* \*\*..\*.\*.\*.\*. :.\*\*\*.\* \*\* \*

|                                               |                                                               |     |
|-----------------------------------------------|---------------------------------------------------------------|-----|
| <i>Homo sapiens</i> ; NP_001364448.1          | pgkirdsnrstllatiqehgyptin----lgivgdnppdIlInalnegisradviitsggv | 587 |
| <i>Drosophila melanogaster</i> ; P39205.3     | pgkifdsntmtellvyfgfncmh----tcvlssdsfqrtkesllfevvdvfcsggv      | 438 |
| <i>Culex quinquefasciatus</i> ; EDS42142.1    | egkifdsnttmlvqmlrqfgfteeqclvsqivvhddyqslrkqieiltgsvhailctggv  | 439 |
| <i>Culex pipiens pallens</i> ; XP_039440701.1 | egkifdsnttmlvqlrrqfgfteeqclvsqivvhddyqslrkqieiltgsvhailctggv  | 438 |
| <i>Anopheles arabiensis</i> ; XP_040156974.1  | egkifdsnttmlvalvrqcgftedqceiqrvvkddfeslkaeiesltgavhiiictggv   | 446 |
| <i>Anopheles darlingi</i> ; ETN60700.1        | egkiydsnttmlvalirqfgftedqceirqqvkvkddfeslenavasltgsmhviictggv | 442 |
|                                               | *** ** . * : * : : * : : : : **                               |     |
| <i>Homo sapiens</i> ; NP_001364448.1          | smgekdylkqvldidlhaqihfgrvmkpglpttfatldidgvrkiifalpgnpvsavvt   | 647 |
| <i>Drosophila melanogaster</i> ; P39205.3     | smgdkdfvksvle-dlqfrihcgvrnikpgkpmtfasrkd----kyffglpgnpvsafvt  | 493 |
| <i>Culex quinquefasciatus</i> ; EDS42142.1    | smgdkdfvkpvk-dlgydlkgrvnmkpgkpftfaskdi----trffglpgnpvsafvt    | 494 |
| <i>Culex pipiens pallens</i> ; XP_039440701.1 | smgdkdfvkpvk-dlgydlkgrvnmkpgkpftfaskdi----trffglpgnpvsafvt    | 493 |
| <i>Anopheles arabiensis</i> ; XP_040156974.1  | smgdkdfvkpvk-alnyelifgrvnmkpgkpcayatskv----tkffglpgnpvsafvt   | 501 |
| <i>Anopheles darlingi</i> ; ETN60700.1        | smgdkdfvkpvk-hlgyklvgrvnmkpgkpctyasspt----tkffglpgnpvsafvt    | 497 |
|                                               | ***.***. * * : ***.*** * .. : . * ***** **                    |     |
| <i>Homo sapiens</i> ; NP_001364448.1          | cnlfvvpalrkmgildpr-----ptiikarlscdvkldprpeyhrcltwhhqp         | 698 |
| <i>Drosophila melanogaster</i> ; P39205.3     | fhlfalpairfaag-----wdrckcsIsvlnvklIn-dfslsdrpefvrask--sg      | 544 |
| <i>Culex quinquefasciatus</i> ; EDS42142.1    | fhlfalpalrkylatlnqttsnlakchlpkitvklItesyeldprpeyarasifsk--gg  | 552 |
| <i>Culex pipiens pallens</i> ; XP_039440701.1 | fhlfalpalrkylatlnqttsnlakchlpkitvklItesyeldprpeyarasivsk--gg  | 551 |
| <i>Anopheles arabiensis</i> ; XP_040156974.1  | fhlfalpalrqylatlnetapntakaslpmitvelldakylvldprpeyarasivr--ng  | 559 |
| <i>Anopheles darlingi</i> ; ETN60700.1        | fhlfalpalrwylcainetkpgqiakcclpmidvelldsineldprpefaratirsr--kg | 555 |
|                                               | . ** . ** . * : * ** *** . * : :                              |     |

---

|                                               |                                                          |     |
|-----------------------------------------------|----------------------------------------------------------|-----|
| <i>Homo sapiens</i> ; NP_001364448.1          | lpwaqstgnqmssrlmsmrsangllmlppkteqyvelhkgevvdvmvigrl----- | 749 |
| <i>Drosophila melanogaster</i> ; P39205.3     | elyasvngnqissrlqsivgadvinlparsdrplakageifpasvlrfdiskye   | 601 |
| <i>Culex quinquefasciatus</i> ; EDS42142.1    | elwaqitgqqissrlksiveadvllhlparspskttivrgesvtaltlrdfistye | 609 |
| <i>Culex pipiens pallens</i> ; XP_039440701.1 | elwaqitgqqissrlksiveadvllhlprspkttivrgesvtaltlrdfisaye   | 608 |
| <i>Anopheles arabiensis</i> ; XP_040156974.1  | kllasitggqissrlkstieadvlllelpartetkpyitagtplkalvrsdfisye | 616 |
| <i>Anopheles darlingi</i> ; ETN60700.1        | kllasvtgnqlssrlkstadalielpaktgertslkagtlvkayvirsdfvsyyd  | 612 |

                  \* . \* \*.\*\*\*\*\*\* \*   \*.\*.\* \*\* ..                   \*   . . . .

---

| <b>Percent Identity Matrix for gephyrin</b>   | <i>Homo sapiens</i> ; NP_001364448.1 | <i>Drosophila melanogaster</i> ; P39205.3 | <i>Culex quinquefasciatus</i> ; EDS42142.1 | <i>Culex pipiens pallens</i> ; XP_039440701.1 | <i>Anopheles arabiensis</i> ; XP_040156974.1 | <i>Anopheles darlingi</i> ; ETN60700.1 |
|-----------------------------------------------|--------------------------------------|-------------------------------------------|--------------------------------------------|-----------------------------------------------|----------------------------------------------|----------------------------------------|
| <i>Homo sapiens</i> ; NP_001364448.1          | 100.00                               | 38.91                                     | 40.75                                      | 40.65                                         | 41.16                                        | 41.47                                  |
| <i>Drosophila melanogaster</i> ; P39205.3     | 38.91                                | 100.00                                    | 50.08                                      | 50.00                                         | 51.10                                        | 51.44                                  |
| <i>Culex quinquefasciatus</i> ; EDS42142.1    | 40.75                                | 50.08                                     | 100.00                                     | 98.03                                         | 69.19                                        | 65.84                                  |
| <i>Culex pipiens pallens</i> ; XP_039440701.1 | 40.65                                | 50.00                                     | 98.03                                      | 100.00                                        | 68.86                                        | 66.17                                  |
| <i>Anopheles arabiensis</i> ; XP_040156974.1  | 41.16                                | 51.10                                     | 69.19                                      | 68.86                                         | 100.00                                       | 76.10                                  |
| <i>Anopheles darlingi</i> ; ETN60700.1        | 41.47                                | 51.44                                     | 65.84                                      | 66.17                                         | 76.10                                        | 100.00                                 |

S1.5. Multiple sequence alignment for phosphosynapsin (Gene ID: 6853)

|                                                |                                                            |     |
|------------------------------------------------|------------------------------------------------------------|-----|
| <i>Homo sapiens</i> ; NP_008881.2              | -----mnylrrrlsdsnfmanlpngymtdl-----qrp-----                | 28  |
| <i>Drosophila melanogaster</i> ; AAF54506.3    | mnfssfkssftsnvnflkrfssgdlsseddvdpsnlppaarpiqdqptkppvaggppn | 60  |
| <i>Anopheles darlingi</i> ; ETN61740.1         | -----mfr---trthenrrsgdlssecedvdpkdlppaarsqqpplqqqmpggpps   | 49  |
| <i>Anopheles stephensi</i> ; XP_035891026.1    | -----mpggppn                                               | 7   |
| <i>Anopheles arabiensis</i> ; XP_040154215.1   | -----mpggppn                                               | 7   |
| <i>Anopheles merus</i> ; XP_041764250.1        | -----mpggppn                                               | 7   |
| <i>Anopheles coluzzii</i> ; XP_040240634.1     | -----mpggppn                                               | 7   |
| <i>Culex quinquefasciatus</i> ; XP_038122578.1 | -----mpggppn                                               | 7   |
| <i>Aedes aegypti</i> ; XP_021705226.1          | -----mpggppn                                               | 7   |
| <i>Aedes albopictus</i> ; XP_029728640.1       | -----mpggppn                                               | 7   |
|                                                |                                                            |     |
| <i>Homo sapiens</i> ; NP_008881.2              | qppppppgahspgatpgp-----gtataerssgvapaaspaap--spgssggg---   | 74  |
| <i>Drosophila melanogaster</i> ; AAF54506.3    | mppppapgqpag-----aapelslsfgagktataapapprgvsaptspa          | 105 |
| <i>Anopheles darlingi</i> ; ETN61740.1         | ippppapgt-gavspggpvppgsapptggpelslsfgkgp-----qrgtsapsspa   | 99  |
| <i>Anopheles stephensi</i> ; XP_035891026.1    | ippppapgtagvspggpvppgsapptggpelslsfgkgp-----aqrtsapsspa    | 59  |
| <i>Anopheles arabiensis</i> ; XP_040154215.1   | ippppapgtagvspggpvppgsapptggpelslsfgkgp-----aqrtsapsspa    | 59  |
| <i>Anopheles merus</i> ; XP_041764250.1        | ippppapgtagvspggpvppgsapptggpelslsfgkgp-----aqrtsapsspa    | 59  |
| <i>Anopheles coluzzii</i> ; XP_040240634.1     | ippppapgtagvspggpvppgsapptggpelslsfgkgp-----aqrtsapsspa    | 59  |
| <i>Culex quinquefasciatus</i> ; XP_038122578.1 | ippppapgtagsavspgpv-pgsapptggpelslsfgkgp-----qrgtsapsspa   | 57  |
| <i>Aedes aegypti</i> ; XP_021705226.1          | ippppapg---savspgpv-pgsapptggpelslsfgkgp-----qrgtsapsspa   | 54  |
| <i>Aedes albopictus</i> ; XP_029728640.1       | ippppapg---savspgpv-pgsapptggpelslsfgkgp-----qrgtsapsspa   | 54  |
| **** * . . * . * *                             |                                                            |     |



---

|                                                |                                                             |     |
|------------------------------------------------|-------------------------------------------------------------|-----|
| <i>Homo sapiens</i> ; NP_008881.2              | gffsslsnavkqttaaaatfseqvgggsgg-----agrggaasrvllvidephtdwaky | 129 |
| <i>Drosophila melanogaster</i> ; AAF54506.3    | ksresllqrvqsltgaardqgasiigaavqsatqrapafskdkyftllvddqntdwsy  | 165 |
| <i>Anopheles darlingi</i> ; ETN61740.1         | ksresllqrvqsltgaardqgasiigaavstas-rvqpfnrdkcftllvddqntdwsy  | 158 |
| <i>Anopheles stephensi</i> ; XP_035891026.1    | ksresllqrvqsltgaardqgasiigaavstas-rvqpfnrdkcftllvddqntdwsy  | 118 |
| <i>Anopheles arabiensis</i> ; XP_040154215.1   | ksresllqrvqsltgaardqgasiigaavstas-rvqpfnrdkcftllvddqntdwsy  | 118 |
| <i>Anopheles merus</i> ; XP_041764250.1        | ksresllqrvqsltgaardqgasiigaavstas-rvqpfnrdkcftllvddqntdwsy  | 118 |
| <i>Anopheles coluzzii</i> ; XP_040240634.1     | ksresllqrvqsltgaardqgasiigaavstas-rvqpfnrdkcftllvddqntdwsy  | 118 |
| <i>Culex quinquefasciatus</i> ; XP_038122578.1 | ksresllqrvqsltgaardqgasiigaavstaa-rvqpfnkdkcftllvddqntdwsy  | 116 |
| <i>Aedes aegypti</i> ; XP_021705226.1          | ksresllqrvqsltgaardqgasiigaavssaa-rvqpfnkdkcftllvddqntdwsy  | 113 |
| <i>Aedes albopictus</i> ; XP_029728640.1       | ksresllqrvqsltgaardqgasiigaavssaa-rvqpfnkdkcftllvddqntdwsy  | 113 |

.\*\* . \*. \*\* . :.\* . \*\*\*\*.\*.\*\*\*.\*

|                                                |                                                               |     |
|------------------------------------------------|---------------------------------------------------------------|-----|
| <i>Homo sapiens</i> ; NP_008881.2              | fkqkkihgeidikveqaebsdlnlvahanggsfsvdmevlrngkvvrslkpdfvlirqha  | 189 |
| <i>Drosophila melanogaster</i> ; AAF54506.3    | frgrllhgdirdirveqaefrditvssadtgppvmtaayrsgtrvarsfrpdfvlirqpp  | 225 |
| <i>Anopheles darlingi</i> ; ETN61740.1         | frgkrlhsdydirveqaeffreimltasadsgpmvgfmr-ggskqakpfrpdfilvrqpp  | 217 |
| <i>Anopheles stephensi</i> ; XP_035891026.1    | frgkrlhsdydirveqaeffreimltasadsgpmvgcna-g-gskqakpfrpdfilvrqpp | 176 |
| <i>Anopheles arabiensis</i> ; XP_040154215.1   | frgkrlhsdydirveqaeffreimltasadsgpmvgcna-g-gskqakpfrpdfilvrqpp | 176 |
| <i>Anopheles merus</i> ; XP_041764250.1        | frgkrlhsdydirveqaeffreimltasadsgpmvgcna-g-gskqakpfrpdfilvrqpp | 176 |
| <i>Anopheles coluzzii</i> ; XP_040240634.1     | frgkrlhsdydirveqaeffreimltasadsgpmvgcna-g-gskqakpfrpdfilvrqpp | 176 |
| <i>Culex quinquefasciatus</i> ; XP_038122578.1 | frgkrlhgdirdirveqaeffreisltnadagplvsfmr-g-sskqpkpfrpdfilvrqap | 174 |
| <i>Aedes aegypti</i> ; XP_021705226.1          | frgkrlhgdirdirveqaeffreisltnadagplvsfmr-g-sskqpkpfrpdfilvrqap | 171 |
| <i>Aedes albopictus</i> ; XP_029728640.1       | frgkrlhgdirdirveqaeffreisltnadagplvsfmr-g-sskqpkpfrpdfilvrqap | 171 |

\*.\*\*\*. . \*.\*\*\*\*\* :. : \* \* :\*\*\*.\*

---

|                                                |                                                             |     |
|------------------------------------------------|-------------------------------------------------------------|-----|
| <i>Homo sapiens</i> ; NP_008881.2              | fsmarngdyrslviglqyagipsvnslhsvynfcdkpwvfaqmvrhkklgteefplidq | 249 |
| <i>Drosophila melanogaster</i> ; AAF54506.3    | r--dgssdyrstllgkyggvpsinslhslyqfqdkpwvfshllqlrrlgrdgfplieq  | 283 |
| <i>Anopheles darlingi</i> ; ETN61740.1         | r--dgsdyrstllgkyggvpsinslhslyqfqdkpwvfahllqlrrlgrdvplveq    | 275 |
| <i>Anopheles stephensi</i> ; XP_035891026.1    | r--dgsdyrstllgkyggvpsinslhslyqfqdkpwvfahllqlrrlgrdafplveq   | 234 |
| <i>Anopheles arabiensis</i> ; XP_040154215.1   | r--dgsdyrstllgkyggvpsinslhslyqfqdkpwvfahllqlrrlgrdafplveq   | 234 |
| <i>Anopheles merus</i> ; XP_041764250.1        | r--dgsdyrstllgkyggvpsinslhslyqfqdkpwvfahllqlrrlgrdafplveq   | 234 |
| <i>Anopheles coluzzii</i> ; XP_040240634.1     | r--dgsdyrstllgkyggvpsinslhslyqfqdkpwvfahllqlrrlgrdafplveq   | 234 |
| <i>Culex quinquefasciatus</i> ; XP_038122578.1 | r--dgakdyrstllgkyggvpsinslhslyqfqdkpwvfahllqlrrlgreafplveq  | 232 |
| <i>Aedes aegypti</i> ; XP_021705226.1          | r--dgakdyrstllgkyggvpsinslhslyqfqdkpwvfahllqlrrlgkeafplveq  | 229 |
| <i>Aedes albopictus</i> ; XP_029728640.1       | r--dgakdyrstllgkyggvpsinslhslyqfqdkpwvfahllqlrrlgkegfplveq  | 229 |

\*\*\*\* ..\*\*\*.\*\*\*.\*\*\*\*\*\*.\* \*\*\*\*\*.....\*\* .\*\*\*.\*

|                                                |                                                           |     |
|------------------------------------------------|-----------------------------------------------------------|-----|
| <i>Homo sapiens</i> ; NP_008881.2              | tfypnhkemssttyp-----vvkmghahsgmgkvkvdnqhdfqdiasvva-----l  | 297 |
| <i>Drosophila melanogaster</i> ; AAF54506.3    | tffpnprdlfqtkfp-----svlkaghchggvatarlenqsalqdaaglvsgagn-d | 335 |
| <i>Anopheles darlingi</i> ; ETN61740.1         | tffpnpkdmtasfytnrqpsstspvksqdcqm-----                     | 308 |
| <i>Anopheles stephensi</i> ; XP_035891026.1    | tffpnpkdmftwtrfp-----cvlkaghchggkatakdnpqalqdaagllcgtglsd | 287 |
| <i>Anopheles arabiensis</i> ; XP_040154215.1   | tffpnpkdmftwtrfp-----cvlkaghchggkatakdnpqalqdaagllcgtglsd | 287 |
| <i>Anopheles merus</i> ; XP_041764250.1        | tffpnpkdmftwtrfp-----cvlkaghchggkatakdnpqalqdaagllcgtglsd | 287 |
| <i>Anopheles coluzzii</i> ; XP_040240634.1     | tffpnpkdmftwtrfp-----cvlkaghchggkatakdnpqalqdaagllcgtglsd | 287 |
| <i>Culex quinquefasciatus</i> ; XP_038122578.1 | tffpnpremlawqrfp-----cvlkaghchggkatakdspgalqdaagllcgtglse | 285 |
| <i>Aedes aegypti</i> ; XP_021705226.1          | tffpnprdmLawqrfp-----cvlkaghcyggkatakdnpqalqdaagllcgtglsd | 282 |
| <i>Aedes albopictus</i> ; XP_029728640.1       | tffpnprdmLawqrfp-----cvlkaghchggkatakdnpqalqdaagllcgtglsd | 282 |

\*\*\*.\* ... :\* ..

---

|                                                |                                                                |     |
|------------------------------------------------|----------------------------------------------------------------|-----|
| <i>Homo sapiens</i> ; NP_008881.2              | tktyataepfidakydvrqkigqnykaymrtsvsgnwktntgsamleqiamsdryklwv    | 357 |
| <i>Drosophila melanogaster</i> ; AAF54506.3    | shcyctiepyidakfsvhiqkiggnnykafmrksitgnwktnggsamleqitltekykswv  | 395 |
| <i>Anopheles darlingi</i> ; ETN61740.1         | -----308                                                       |     |
| <i>Anopheles stephensi</i> ; XP_035891026.1    | ngsysclepyidakfdvhiqkigstykafrmrksisgnwktnggsamleqipmtekyktwv  | 347 |
| <i>Anopheles arabiensis</i> ; XP_040154215.1   | ngsysclepyidakfdvhiqkigstykafrmrksisgnwktnggsamleqipmtekyktwv  | 347 |
| <i>Anopheles merus</i> ; XP_041764250.1        | ngsysclepyidakfdvhiqkigstykafrmrksisgnwktnggsamleqipmtekyktwv  | 347 |
| <i>Anopheles coluzzii</i> ; XP_040240634.1     | ngsysclepyidakfdvhiqkigstykafrmrksisgnwktnggsamleqipmtekyktwv  | 347 |
| <i>Culex quinquefasciatus</i> ; XP_038122578.1 | stsysclepyidakfdvhiqkiggnnykafrmrksisgnwktnggsamleqipmtekykswi | 345 |
| <i>Aedes aegypti</i> ; XP_021705226.1          | stsysclepyvdakfdihqkigtnykafrmrksisgnwktnggsamleqipmtekykawi   | 342 |
| <i>Aedes albopictus</i> ; XP_029728640.1       | stsysclepyvdakfdihqkigtnykafrmrksisgnwktnggsamleqipmtekykawi   | 342 |

|                                                |                                                               |     |
|------------------------------------------------|---------------------------------------------------------------|-----|
| <i>Homo sapiens</i> ; NP_008881.2              | dtcseifggldicavealhgdgrdhiievvgssmpligdhqdedkqlivelvvnkmaqa   | 417 |
| <i>Drosophila melanogaster</i> ; AAF54506.3    | deiselfggmevcglsvvvakdgreiisacdftaligdtqeedrrqiadlvvgrmqnv    | 455 |
| <i>Anopheles darlingi</i> ; ETN61740.1         | -----308                                                      |     |
| <i>Anopheles stephensi</i> ; XP_035891026.1    | devselfggmevcgvavivskegkefiisaadstfplmgdsqeedrrqiadlvvgrmqnv  | 407 |
| <i>Anopheles arabiensis</i> ; XP_040154215.1   | devselfggmevcgvavivskegkefiisaadstfplmgdtqeedrrqiadlvvgrmqnv  | 407 |
| <i>Anopheles merus</i> ; XP_041764250.1        | devselfggmevcgvavivskegkefiisaadstfplmgdtqeedrrqiadlvvgrmqnv  | 407 |
| <i>Anopheles coluzzii</i> ; XP_040240634.1     | devselfggmevcgvavivskegkefiisaadstfplmgdtqeedrrqiadlvvgrmqnv  | 407 |
| <i>Culex quinquefasciatus</i> ; XP_038122578.1 | devselfgsmevcgiaivivskegkefiisasdstfplmgdtqeedrrqiadlvvgrmqnv | 405 |
| <i>Aedes aegypti</i> ; XP_021705226.1          | devselfggmevcgiaivivskegkefiisasdstfplmgdtqeedrrhiadlvvgrmqnv | 402 |
| <i>Aedes albopictus</i> ; XP_029728640.1       | devselfggmevcgiaivivskegkefiisasdstfplmgdtqeedrrhiadlvvgrmqnv | 402 |

---

|                                                |                                                              |     |
|------------------------------------------------|--------------------------------------------------------------|-----|
| <i>Homo sapiens</i> ; NP_008881.2              | lprqrqrdsapgrg-shgqtspgalplgrqtsqqpagppaqrpppqgppqpqpgpqr    | 476 |
| <i>Drosophila melanogaster</i> ; AAF54506.3    | crpsmaq-tgpgklpsrsvssraesptdegvaptplpagprpapg-gpppipe--r     | 510 |
| <i>Anopheles darlingi</i> ; ETN61740.1         | -----308                                                     |     |
| <i>Anopheles stephensi</i> ; XP_035891026.1    | crpsmmt-ka----vsrssissrgtspted----ap-pvpigtrpvpgggpppipe--r  | 455 |
| <i>Anopheles arabiensis</i> ; XP_040154215.1   | crpsmmt-ka----vsrssissrgtspted----ap-pvpigtrpvpgggpppipe--r  | 455 |
| <i>Anopheles merus</i> ; XP_041764250.1        | crpsmmt-ka----vsrssissrgtspted----ap-pvpigtrpvpgggpppipe--r  | 455 |
| <i>Anopheles coluzzii</i> ; XP_040240634.1     | crpsmmt-ka----vsrssissrgtspted----ap-pvpigtrpvpgggpppipe--r  | 455 |
| <i>Culex quinquefasciatus</i> ; XP_038122578.1 | crpsmlt-ka----tsrtsissrggsptee----np-pvpigsrpapvgggpppipe--r | 453 |
| <i>Aedes aegypti</i> ; XP_021705226.1          | crpsmmt-ka----tsrssissrggsptee----mp-pvpigtrpapvgggpppipe--r | 450 |
| <i>Aedes albopictus</i> ; XP_029728640.1       | crpsmmt-ka----tsrtsissrggsptee----mp-pvpigtrpapvgggpppipe--r | 450 |

|                                                |                                                           |     |
|------------------------------------------------|-----------------------------------------------------------|-----|
| <i>Homo sapiens</i> ; NP_008881.2              | qgpplqqrpppqgqqlsglppagsplpqrpsptsapqqpasqaapptqgqgrq---- | 532 |
| <i>Drosophila melanogaster</i> ; AAF54506.3    | tspavgsi-----grlssrsise-----vpeepss-sgpstvggvrdsqt        | 551 |
| <i>Anopheles darlingi</i> ; ETN61740.1         | -----308                                                  |     |
| <i>Anopheles stephensi</i> ; XP_035891026.1    | ttpgvgsi-----grhgsfssqsg-----eppeqpse-raptlnsvgrrdsqa     | 497 |
| <i>Anopheles arabiensis</i> ; XP_040154215.1   | ttpgvgsi-----grhgsfssqsg-----eppeqpse-raptlnsvgrrdsqa     | 497 |
| <i>Anopheles merus</i> ; XP_041764250.1        | ttpgvgsi-----grhgsfssqsg-----eppeqpse-raptlnsvgrrdsqa     | 497 |
| <i>Anopheles coluzzii</i> ; XP_040240634.1     | ttpgvgsi-----grhgsfssqsg-----eppeqpse-raptlnsvgrrdsqa     | 497 |
| <i>Culex quinquefasciatus</i> ; XP_038122578.1 | ttpgvgsi-----grhgsissqsg-----eppeqpm-d-kaptlnsvgrrdsqa    | 495 |
| <i>Aedes aegypti</i> ; XP_021705226.1          | ttpgvgsi-----grhgsissqsg-----eipdqpte-kaptlnslgrrdsqa     | 492 |
| <i>Aedes albopictus</i> ; XP_029728640.1       | ttpgvgsi-----grhgsissqsg-----eipeqpse-kaptlnslgrrdsqa     | 492 |

---

|                                                |                                                              |     |
|------------------------------------------------|--------------------------------------------------------------|-----|
| <i>Homo sapiens</i> ; NP_008881.2              | --srpvaggp-----gappaarpp-aspspqrqagppq-atrqt--svsgp-----     | 572 |
| <i>Drosophila melanogaster</i> ; AAF54506.3    | sqsstissvsrag-----qrppqtqnsvedaedtmknlrktfagifgdmxeia        | 601 |
| <i>Anopheles darlingi</i> ; ETN61740.1         | -----308                                                     |     |
| <i>Anopheles stephensi</i> ; XP_035891026.1    | sqsssvsgissasaarsaagkappan-atgapsvvedaedtmknlrktfagifgdm---- | 552 |
| <i>Anopheles arabiensis</i> ; XP_040154215.1   | sqsssvsgvssasaarsgvgkvpaaagpgggsvedaedtmknlrktfagifgdm----   | 553 |
| <i>Anopheles merus</i> ; XP_041764250.1        | sqsssvsgvssasaarsgvgkvpaaagpgggsvedaedtmknlrktfagifgdm----   | 553 |
| <i>Anopheles coluzzii</i> ; XP_040240634.1     | sqsssvsgvssasaarsgvgkvpaaagpgggsvedaedtmknlrktfagifgdm----   | 553 |
| <i>Culex quinquefasciatus</i> ; XP_038122578.1 | sqsssisgvssasaarsnaskvgp-gpgqgalgnvdeaedtmknlrktfagifgdm---- | 550 |
| <i>Aedes aegypti</i> ; XP_021705226.1          | sqsssvsgvssasaarsgvskvtt-lpgqgtv--adeaedtmknlrktfagifgdm---- | 545 |
| <i>Aedes albopictus</i> ; XP_029728640.1       | sqsssvsgvssasaarsgvskvtt-vpgqgtv--adeaedtmknlrktfagifgdm---- | 545 |

|                                                |                                                         |     |
|------------------------------------------------|---------------------------------------------------------|-----|
| <i>Homo sapiens</i> ; NP_008881.2              | -----appkasgappggqqrqgppqkppgpagptrq-----asqag-----     | 608 |
| <i>Drosophila melanogaster</i> ; AAF54506.3    | nkkrgrtasetssgsgpgs-----vpssagpgsgfsssfkgqfsfagkgegvist | 652 |
| <i>Anopheles darlingi</i> ; ETN61740.1         | -----308                                                |     |
| <i>Anopheles stephensi</i> ; XP_035891026.1    | -----552                                                |     |
| <i>Anopheles arabiensis</i> ; XP_040154215.1   | -----553                                                |     |
| <i>Anopheles merus</i> ; XP_041764250.1        | -----553                                                |     |
| <i>Anopheles coluzzii</i> ; XP_040240634.1     | -----553                                                |     |
| <i>Culex quinquefasciatus</i> ; XP_038122578.1 | -----550                                                |     |
| <i>Aedes aegypti</i> ; XP_021705226.1          | -----545                                                |     |
| <i>Aedes albopictus</i> ; XP_029728640.1       | -----545                                                |     |

---

|                                                |                                                             |     |
|------------------------------------------------|-------------------------------------------------------------|-----|
| <i>Homo sapiens</i> ; NP_008881.2              | ---pvprtgppttqprpsgpgpagrpkpqlaqkpsqdvppp-ataaaggpphpqlnks- | 663 |
| <i>Drosophila melanogaster</i> ; AAF54506.3    | qptqrpseppai----pttassavrpessvsvdsrntdtlteragagyqpvtnyeqqe  | 708 |
| <i>Anopheles darlingi</i> ; ETN61740.1         | -----                                                       | 308 |
| <i>Anopheles stephensi</i> ; XP_035891026.1    | -----                                                       | 552 |
| <i>Anopheles arabiensis</i> ; XP_040154215.1   | -----                                                       | 553 |
| <i>Anopheles merus</i> ; XP_041764250.1        | -----                                                       | 553 |
| <i>Anopheles coluzzii</i> ; XP_040240634.1     | -----                                                       | 553 |
| <i>Culex quinquefasciatus</i> ; XP_038122578.1 | -----                                                       | 550 |
| <i>Aedes aegypti</i> ; XP_021705226.1          | -----                                                       | 545 |
| <i>Aedes albopictus</i> ; XP_029728640.1       | -----                                                       | 545 |

|                                                |                                                              |     |
|------------------------------------------------|--------------------------------------------------------------|-----|
| <i>Homo sapiens</i> ; NP_008881.2              | -----qsl-----tnafnlpe-pa--pprp--sls                          | 683 |
| <i>Drosophila melanogaster</i> ; AAF54506.3    | rvnpfdkepsksgsaasihtsssssisssissrinrngnaiqsppppagppppppptnvt | 768 |
| <i>Anopheles darlingi</i> ; ETN61740.1         | -----                                                        | 308 |
| <i>Anopheles stephensi</i> ; XP_035891026.1    | -----                                                        | 552 |
| <i>Anopheles arabiensis</i> ; XP_040154215.1   | -----                                                        | 553 |
| <i>Anopheles merus</i> ; XP_041764250.1        | -----                                                        | 553 |
| <i>Anopheles coluzzii</i> ; XP_040240634.1     | -----                                                        | 553 |
| <i>Culex quinquefasciatus</i> ; XP_038122578.1 | -----                                                        | 550 |
| <i>Aedes aegypti</i> ; XP_021705226.1          | -----                                                        | 545 |
| <i>Aedes albopictus</i> ; XP_029728640.1       | -----                                                        | 545 |

---

|                                                |                                                               |     |
|------------------------------------------------|---------------------------------------------------------------|-----|
| <i>Homo sapiens</i> ; NP_008881.2              | qdevkaetirslrksfaslfsd-----                                   | 705 |
| <i>Drosophila melanogaster</i> ; AAF54506.3    | avgsnansssgyrnsfssslskdktsygnygsttsvetitrmtdntntnigatateageas | 828 |
| <i>Anopheles darlingi</i> ; ETN61740.1         | -----                                                         | 308 |
| <i>Anopheles stephensi</i> ; XP_035891026.1    | -----                                                         | 552 |
| <i>Anopheles arabiensis</i> ; XP_040154215.1   | -----                                                         | 553 |
| <i>Anopheles merus</i> ; XP_041764250.1        | -----                                                         | 553 |
| <i>Anopheles coluzzii</i> ; XP_040240634.1     | -----                                                         | 553 |
| <i>Culex quinquefasciatus</i> ; XP_038122578.1 | -----                                                         | 550 |
| <i>Aedes aegypti</i> ; XP_021705226.1          | -----                                                         | 545 |
| <i>Aedes albopictus</i> ; XP_029728640.1       | -----                                                         | 545 |

|                                                |                                                             |     |
|------------------------------------------------|-------------------------------------------------------------|-----|
| <i>Homo sapiens</i> ; NP_008881.2              | -----                                                       | 705 |
| <i>Drosophila melanogaster</i> ; AAF54506.3    | gvtaitnisnsdgivaptgtittsvttndwrsaigmrsasvysapaavttvlpgdtsgy | 888 |
| <i>Anopheles darlingi</i> ; ETN61740.1         | -----                                                       | 308 |
| <i>Anopheles stephensi</i> ; XP_035891026.1    | -----                                                       | 552 |
| <i>Anopheles arabiensis</i> ; XP_040154215.1   | -----                                                       | 553 |
| <i>Anopheles merus</i> ; XP_041764250.1        | -----                                                       | 553 |
| <i>Anopheles coluzzii</i> ; XP_040240634.1     | -----                                                       | 553 |
| <i>Culex quinquefasciatus</i> ; XP_038122578.1 | -----                                                       | 550 |
| <i>Aedes aegypti</i> ; XP_021705226.1          | -----                                                       | 545 |
| <i>Aedes albopictus</i> ; XP_029728640.1       | -----                                                       | 545 |

---

|                                                |                                                              |     |     |
|------------------------------------------------|--------------------------------------------------------------|-----|-----|
| <i>Homo sapiens</i> ; NP_008881.2              | -----                                                        | 705 |     |
| <i>Drosophila melanogaster</i> ; AAF54506.3    | dsnsiasqgeglnnpsdlpsytrpsysrsesnaskhsldlvifgdskttpasygngkytr |     | 948 |
| <i>Anopheles darlingi</i> ; ETN61740.1         | -----                                                        | 308 |     |
| <i>Anopheles stephensi</i> ; XP_035891026.1    | -----                                                        | 552 |     |
| <i>Anopheles arabiensis</i> ; XP_040154215.1   | -----                                                        | 553 |     |
| <i>Anopheles merus</i> ; XP_041764250.1        | -----                                                        | 553 |     |
| <i>Anopheles coluzzii</i> ; XP_040240634.1     | -----                                                        | 553 |     |
| <i>Culex quinquefasciatus</i> ; XP_038122578.1 | -----                                                        | 550 |     |
| <i>Aedes aegypti</i> ; XP_021705226.1          | -----                                                        | 545 |     |
| <i>Aedes albopictus</i> ; XP_029728640.1       | -----                                                        | 545 |     |

|                                                |                                                            |     |      |
|------------------------------------------------|------------------------------------------------------------|-----|------|
| <i>Homo sapiens</i> ; NP_008881.2              | -----                                                      | 705 |      |
| <i>Drosophila melanogaster</i> ; AAF54506.3    | aagsisdadmifggppsnyktdrfgasksmstsggvsgngsgsglggykiydsiqnaa |     | 1008 |
| <i>Anopheles darlingi</i> ; ETN61740.1         | -----                                                      | 308 |      |
| <i>Anopheles stephensi</i> ; XP_035891026.1    | -----                                                      | 552 |      |
| <i>Anopheles arabiensis</i> ; XP_040154215.1   | -----                                                      | 553 |      |
| <i>Anopheles merus</i> ; XP_041764250.1        | -----                                                      | 553 |      |
| <i>Anopheles coluzzii</i> ; XP_040240634.1     | -----                                                      | 553 |      |
| <i>Culex quinquefasciatus</i> ; XP_038122578.1 | -----                                                      | 550 |      |
| <i>Aedes aegypti</i> ; XP_021705226.1          | -----                                                      | 545 |      |
| <i>Aedes albopictus</i> ; XP_029728640.1       | -----                                                      | 545 |      |



---

|                                                |                                  |     |      |
|------------------------------------------------|----------------------------------|-----|------|
| <i>Homo sapiens</i> ; NP_008881.2              | -----                            | 705 |      |
| <i>Drosophila melanogaster</i> ; AAF54506.3    | fsdfsdsgsmssigshtkrwsaskeeddldlk |     | 1041 |
| <i>Anopheles darlingi</i> ; ETN61740.1         | -----                            | 308 |      |
| <i>Anopheles stephensi</i> ; XP_035891026.1    | -----                            | 552 |      |
| <i>Anopheles arabiensis</i> ; XP_040154215.1   | -----                            | 553 |      |
| <i>Anopheles merus</i> ; XP_041764250.1        | -----                            | 553 |      |
| <i>Anopheles coluzzii</i> ; XP_040240634.1     | -----                            | 553 |      |
| <i>Culex quinquefasciatus</i> ; XP_038122578.1 | -----                            | 550 |      |
| <i>Aedes aegypti</i> ; XP_021705226.1          | -----                            | 545 |      |
| <i>Aedes albopictus</i> ; XP_029728640.1       | -----                            | 545 |      |

| <b>Percent Identity Matrix for phosphosynapsin</b> | <i>Homo sapiens</i> ; NP_008881.2 | <i>Drosophila melanogaster</i> ; AAF54506.3 | <i>Anopheles darlingi</i> ; ETN61740.1 | <i>Anopheles stephensi</i> ; XP_035891026.1 | <i>Anopheles arabiensis</i> ; XP_040154215.1 | <i>Anopheles merus</i> ; XP_041764250.1 | <i>Anopheles coluzzii</i> ; XP_040240634.1 | <i>Culex quinquefasciatus</i> ; XP_038122578.1 | <i>Aedes aegypti</i> ; XP_021705226.1 | <i>Aedes albopictus</i> ; XP_029728640.1 |
|----------------------------------------------------|-----------------------------------|---------------------------------------------|----------------------------------------|---------------------------------------------|----------------------------------------------|-----------------------------------------|--------------------------------------------|------------------------------------------------|---------------------------------------|------------------------------------------|
| <i>Homo sapiens</i> ; NP_008881.2                  | 100.00                            | 38.63                                       | 36.88                                  | 41.04                                       | 41.35                                        | 41.15                                   | 41.15                                      | 40.04                                          | 40.24                                 | 40.44                                    |
| <i>Drosophila melanogaster</i> ; AAF54506.3        | 38.63                             | 100.00                                      | 68.18                                  | 72.52                                       | 72.38                                        | 72.57                                   | 72.57                                      | 71.70                                          | 71.62                                 | 72.20                                    |
| <i>Anopheles darlingi</i> ; ETN61740.1             | 36.88                             | 68.18                                       | 100.00                                 | 92.25                                       | 91.47                                        | 91.86                                   | 92.25                                      | 85.21                                          | 84.31                                 | 84.31                                    |
| <i>Anopheles stephensi</i> ; XP_035891026.1        | 41.04                             | 72.52                                       | 92.25                                  | 100.00                                      | 97.46                                        | 97.64                                   | 97.83                                      | 88.52                                          | 87.87                                 | 88.05                                    |
| <i>Anopheles arabiensis</i> ; XP_040154215.1       | 41.35                             | 72.38                                       | 91.47                                  | 97.46                                       | 100.00                                       | 99.82                                   | 99.64                                      | 88.55                                          | 88.81                                 | 88.99                                    |
| <i>Anopheles merus</i> ; XP_041764250.1            | 41.15                             | 72.57                                       | 91.86                                  | 97.64                                       | 99.82                                        | 100.00                                  | 99.82                                      | 88.55                                          | 88.81                                 | 88.99                                    |
| <i>Anopheles coluzzii</i> ; XP_040240634.1         | 41.15                             | 72.57                                       | 92.25                                  | 97.83                                       | 99.64                                        | 99.82                                   | 100.00                                     | 88.73                                          | 88.99                                 | 89.17                                    |
| <i>Culex quinquefasciatus</i> ; XP_038122578.1     | 40.04                             | 71.70                                       | 85.21                                  | 88.52                                       | 88.55                                        | 88.55                                   | 88.73                                      | 100.00                                         | 94.31                                 | 94.68                                    |
| <i>Aedes aegypti</i> ; XP_021705226.1              | 40.24                             | 71.62                                       | 84.31                                  | 87.87                                       | 88.81                                        | 88.81                                   | 88.99                                      | 94.31                                          | 100.00                                | 98.90                                    |
| <i>Aedes albopictus</i> ; XP_029728640.1           | 40.44                             | 72.20                                       | 84.31                                  | 88.05                                       | 88.99                                        | 88.99                                   | 89.17                                      | 94.68                                          | 98.90                                 | 100.00                                   |

*S1.6 Multiple sequence alignment for choline acetyltransferase (Gene ID: 42249)*

|                                             |                                                             |    |
|---------------------------------------------|-------------------------------------------------------------|----|
| <i>Drosophila melanogaster</i> ; AAA28406.2 | masneastsaaagsgpesaalfsklrfsigsgpnspqrsvnlrgflthrlsnitpsdtg | 60 |
| <i>Culex quinquefasciatus</i> ; EDS31208.1  | -----                                                       | 0  |
| <i>Aedes aegypti</i> ; XP_021713002.1       | -----                                                       | 0  |

|                                             |                                                              |     |
|---------------------------------------------|--------------------------------------------------------------|-----|
| <i>Drosophila melanogaster</i> ; AAA28406.2 | wkdsilsipkkwlstaesvdefgfpdtlpkvpvpaldetmadyiralepittpaqlertk | 120 |
| <i>Culex quinquefasciatus</i> ; EDS31208.1  | -----mingft-lrmlpkvpvptldqmaeylrvlspivtaqqldhtr              | 42  |
| <i>Aedes aegypti</i> ; XP_021713002.1       | -----mlpkvpvptldqtmteyqralqpiltpqqlerar                      | 34  |

\*\*\*\*\*.\*.\*.\*.\* \* \* \* \* \* \*\*....

|                                             |                                                               |     |
|---------------------------------------------|---------------------------------------------------------------|-----|
| <i>Drosophila melanogaster</i> ; AAA28406.2 | elirqfsapqgigarlhqylldkreaednwayyywlnemymdiriplpinsnpgmvfppr  | 180 |
| <i>Culex quinquefasciatus</i> ; EDS31208.1  | svikhftapngpgtalqqylldkrdaddnwayyywlnndmyldnplplpinsnpgmvmppr | 102 |
| <i>Aedes aegypti</i> ; XP_021713002.1       | giirftapnqlgttlqqflldkreaednwayyywlnndmymdnplplpinsnpgmvlppr  | 94  |

```
.*.**. * *.**.*.***.***.***.***.***.***.***.***
```

|                                             |                                                              |     |
|---------------------------------------------|--------------------------------------------------------------|-----|
| <i>Drosophila melanogaster</i> ; AAA28406.2 | rftkvhdvahfaarlldgilshremldsgelperaasreknqplcmaqyyrllgscrrp  | 240 |
| <i>Culex quinquefasciatus</i> ; EDS31208.1  | kfttvndisrfgarlidhlmlhkemldggglvqeratsrekgqplcmaqyyrllgscrrp | 162 |
| <i>Aedes aegypti</i> ; XP_021713002.1       | kfttvndlarfaarlvdhlvshkemldsgglageratsrekgqplcmaqyyrllgscrrp | 154 |

```
.* *.*,*...* ***,* .. *.***** * *  ***,***** *****
```

|                                             |                                                             |     |
|---------------------------------------------|-------------------------------------------------------------|-----|
| <i>Drosophila melanogaster</i> ; AAA28406.2 | gvkqdsqflpsrserIndedrhwvicrnqmycvvlqasdrqklseasqilyvlsdap   | 300 |
| <i>Culex quinquefasciatus</i> ; EDS31208.1  | gdprdsqylpeqr----tdehvvccrnqmyclpvkagdrgrlnedeiasqillylndap | 218 |
| <i>Aedes aegypti</i> ; XP_021713002.1       | genrdsqylpeqr----tdehvivccrnqmyclpvkagdrgrlnedeiasqvlhvndap | 210 |

\* .\*\*\*.\*\* ,                    \* \*\*.\* \*\*\*\*\*..\* \*\*.\* \* \*\*\*\*\*.\*.\* \*\*

|                                             |                                                               |     |
|---------------------------------------------|---------------------------------------------------------------|-----|
| <i>Drosophila melanogaster</i> ; AAA28406.2 | clpakpvpglltaeprstwardremqlqederqnrlleietaqvvlcdeplagnfnar    | 360 |
| <i>Culex quinquefasciatus</i> ; EDS31208.1  | clarkpprigvlttaqrpqwardrqmlllleeqnarnielieqalvlcidepipltynar  | 278 |
| <i>Aedes aegypti</i> ; XP_021713002.1       | clsrrasriglltaeprqrwakdrklillleeqnarnielieqalvlcidepipltfnar  | 270 |
|                                             | ** . :*.**.* **..*** ..** **..**** * *.**..**.                |     |
| <i>Drosophila melanogaster</i> ; AAA28406.2 | gftgatptvhragdrdetnmahemihgggseyngsnrwndktmqliictdgtwglcyehs  | 420 |
| <i>Culex quinquefasciatus</i> ; EDS31208.1  | gfngspagahycgggrdesnmaqemihgggsefnsanrwndktmqliicndgtwglcyehs | 338 |
| <i>Aedes aegypti</i> ; XP_021713002.1       | gfngspagahycgggrdesnmaqemihgggseyngsnrwndktmqliicndgtwglcyehs | 330 |
|                                             | **.*. * * ***.***.*****.*.***** *****                         |     |
| <i>Drosophila melanogaster</i> ; AAA28406.2 | csegiavvvlllekiykkiehpded-nglpqhhlppperlewvgpqlqlrfaqasksvd   | 479 |
| <i>Culex quinquefasciatus</i> ; EDS31208.1  | psegiavvqllegilkkidempaeagndtaqnhlppperlewivrpaidlrreaarsid   | 398 |
| <i>Aedes aegypti</i> ; XP_021713002.1       | psegiavvqllegiykkidempakee-tgsqdhlppperlewivrpaidlriqeaaknvd  | 389 |
|                                             | ***** * ***.* * . * ***** * ... * ..*                         |     |
| <i>Drosophila melanogaster</i> ; AAA28406.2 | kciddldfyvyryqsygkftikscqvspdvylqlalqlahyk-----               | 521 |
| <i>Culex quinquefasciatus</i> ; EDS31208.1  | rsiedldfyvyrykpfgknfikacqvspdvfiqlalqlayfkvpvetlphvesqpgle    | 458 |
| <i>Aedes aegypti</i> ; XP_021713002.1       | kniedldfyvyrypfgknfikacqvspdvfiqlalqlayfk-----                | 431 |
|                                             | . *.*****. **.***.*****.*****..*                              |     |
| <i>Drosophila melanogaster</i> ; AAA28406.2 | -----                                                         | 521 |
| <i>Culex quinquefasciatus</i> ; EDS31208.1  | krrsggstmtscplpscpvpdsanrfqhnpitltpqrtftlnpcqhkhhkhapsircqn   | 518 |
| <i>Aedes aegypti</i> ; XP_021713002.1       | -----                                                         | 431 |

|                                             |                                                              |     |
|---------------------------------------------|--------------------------------------------------------------|-----|
| <i>Drosophila melanogaster</i> ; AAA28406.2 | -----lygrlvatyesastrflhgrvdciraastealewakamcqge              | 564 |
| <i>Culex quinquefasciatus</i> ; EDS31208.1  | qvhasvrnslfrvivtrlyghlvstyesastrrfmlgrvdcirsassealewakamcqge | 578 |
| <i>Aedes aegypti</i> ; XP_021713002.1       | -----lygylvstyesastrrflgrvdcirsasmealewakamcqge              | 474 |
|                                             | *** **.******.* *****.* *****                                |     |
| <i>Drosophila melanogaster</i> ; AAA28406.2 | ganvplesdredeesrkvkfsiyskdhlrelfrcavarqtevmvknlgngidipllgl   | 624 |
| <i>Culex quinquefasciatus</i> ; EDS31208.1  | ganvtlesdkeddysae-aandakkrdnlrelfrcaaarqtevmvqnilghgidihllgl | 637 |
| <i>Aedes aegypti</i> ; XP_021713002.1       | ganvtlesdkeedysse--andakkrdhrelfrcaaarqtevmvqnilghgidihllgl  | 532 |
|                                             | **** **.*.*.. .. .*.*****.*****.*.*.* *****                  |     |
| <i>Drosophila melanogaster</i> ; AAA28406.2 | reasiev-tgemhelfkdesyiisqcfllstsqvacstdsfmgypvtprgygcsynphp  | 683 |
| <i>Culex quinquefasciatus</i> ; EDS31208.1  | reaskelnqgtvhdlftddcykiancfllstsqvacstnsfmgypvtpghygasyngph  | 697 |
| <i>Aedes aegypti</i> ; XP_021713002.1       | reacre-qqgtlhelftdesykiancfllstsqvacstnsfmgypvtpghygasyngph  | 591 |
|                                             | *** * *.*.*.*.* *****.******.*.*.* *****                     |     |
| <i>Drosophila melanogaster</i> ; AAA28406.2 | eqivfcvsafyscedtsasryakslqdsldimrdllqn                       | 721 |
| <i>Culex quinquefasciatus</i> ; EDS31208.1  | neiifcisaffssdktsasrfarslqdsldamrdlls-                       | 734 |
| <i>Aedes aegypti</i> ; XP_021713002.1       | neiifcisaffssdktsasrfarslqdsldamrdlls-                       | 628 |
|                                             | ..*.*.*.*.* .*****.****** *****                              |     |

---

| Percent Identity Matrix for choline acetyl-transferase | <i>Drosophila melanogaster</i> ; AAA28406.2 | <i>Culex quinquefasciatus</i> ; EDS31208.1 | <i>Aedes aegypti</i> ; XP_021713002.1 |
|--------------------------------------------------------|---------------------------------------------|--------------------------------------------|---------------------------------------|
| <i>Drosophila melanogaster</i> ; AAA28406.2            | 100.00                                      | 67.66                                      | 71.25                                 |
| <i>Culex quinquefasciatus</i> ; EDS31208.1             | 67.66                                       | 100.00                                     | 87.26                                 |
| <i>Aedes aegypti</i> ; XP_021713002.1                  | 71.25                                       | 87.26                                      | 100.00                                |

S1.7. Multiple sequence alignment for glutamine synthetase (Gene ID: 2752)

|                                               |                                                              |     |
|-----------------------------------------------|--------------------------------------------------------------|-----|
| <i>Homo sapiens</i> ; NP_001028216.1          | -----mttsasshlnkgikqvymslpqg                                 | 23  |
| <i>Drosophila melanogaster</i> ; AHN59591.1   | -----mhsamsariledspnarinktildrylsplq                         | 32  |
| <i>Aedes aegypti</i> ; AAV31915.1             | -----msrtleespnahinktldkymslpmp                              | 27  |
| <i>Culex tarsalis</i> ; JAV34836.1            | msfrvfgllirqelagvasgkastrmistssvrsarilkdspnaylnktlldryqklkyd | 60  |
| <i>Culex quinquefasciatus</i> ; EDS39993.1    | -----                                                        | 0   |
| <i>Culex pipiens pallens</i> ; XP_039453062.1 | -----                                                        | 0   |
|                                               |                                                              |     |
| <i>Homo sapiens</i> ; NP_001028216.1          | -ekvqamyiwidgtgeglrcktr-----tldsepkcveelpewnfdgsstlqsegsnsdm | 77  |
| <i>Drosophila melanogaster</i> ; AHN59591.1   | enivqatyvwidgtgedlrckdr-----tldfipqspkelpwnydgsscyqaegsnsdt  | 87  |
| <i>Aedes aegypti</i> ; AAV31915.1             | egkiqatyiwidgtgenlrckdr-----tlefipekpsdlpiwnydgsscyqaeghnsdv | 82  |
| <i>Culex tarsalis</i> ; JAV34836.1            | pkyvqatyiwidgtgenvrckdr-----tldfipekpsdlpiwnydgsscyqaeghnsdv | 115 |
| <i>Culex quinquefasciatus</i> ; EDS39993.1    | -----mqncrelipntlsysfpaistdlpiwnydgsscyqaeghnsdv             | 44  |
| <i>Culex pipiens pallens</i> ; XP_039453062.1 | -----                                                        | 0   |
|                                               |                                                              |     |
| <i>Homo sapiens</i> ; NP_001028216.1          | ylvpaamfrdpfrkdpnklvlcevfkyrrpaetnlrhtckrimdmvsnqhpwfgmeqey  | 137 |
| <i>Drosophila melanogaster</i> ; AHN59591.1   | ylpvaiykdpfrggnnilvmcdtykfdgtptdtnkrktclevankcaaepwfgieqey   | 147 |
| <i>Aedes aegypti</i> ; AAV31915.1             | ylhpvaifkdpmrpgnnilvmcetyrfdgtptqsnkrtrcrevcdkvadqqpwfgieqey | 142 |
| <i>Culex tarsalis</i> ; JAV34836.1            | ylhpvaiykdprggnnilvmcetyrfdgrptesnkrtrcrevcdqvaaekpwfgieqey  | 175 |
| <i>Culex quinquefasciatus</i> ; EDS39993.1    | ylhpvaiyrdprggnnilvmcetyrfdgrptesnkrtrcrevcdqvagekpwfgieqey  | 104 |
| <i>Culex pipiens pallens</i> ; XP_039453062.1 | -----mcetyrfdgrptesnkrtrcrevcdqvagekpwfgieqey                | 40  |
| *:..... *...* *:* * : : : *****               |                                                              |     |

---

|                                               |                                                             |     |
|-----------------------------------------------|-------------------------------------------------------------|-----|
| <i>Homo sapiens</i> ; NP_001028216.1          | tlmgtdghpfgwpsngfpgpggpyycvgadraygrdiveahyraclyagvkiagtnaev | 197 |
| <i>Drosophila melanogaster</i> ; AHN59591.1   | tlldfdghplgwpkngfpgpggpyycvgankvyardivdahyraclyagikvsgtnaev | 207 |
| <i>Aedes aegypti</i> ; AAV31915.1             | tlldidgrplgwpkngfpgpggpyycvgankvyardivdahyraclyagikicgtnaev | 202 |
| <i>Culex tarsalis</i> ; JAV34836.1            | tlldidgrplgwpkngfpgpggpyycvgadkvyardivdahyraclyagvkicgtnaev | 235 |
| <i>Culex quinquefasciatus</i> ; EDS39993.1    | tlldidgrplgwpkngfpgpggpyycvgadkvyardivdahyraclyagvkicgtnaev | 164 |
| <i>Culex pipiens pallens</i> ; XP_039453062.1 | tlldidgrplgwpkngfpgpggpyycvgadkvyardivdahyraclyagvkicgtnaev | 100 |

\*.. \*\*..\*\*\* \*\*\*\*\*..\* \*\*\*\*\*..\*..\*\*\*\*\*

|                                               |                                                              |     |
|-----------------------------------------------|--------------------------------------------------------------|-----|
| <i>Homo sapiens</i> ; NP_001028216.1          | mpaqwefqigpcegismgdhlwvarfilhrvcedfgviatfdpkpipgnwngagchtnfs | 257 |
| <i>Drosophila melanogaster</i> ; AHN59591.1   | mpaqwefqvgpcegisigddlwmrflhriseefgivstldpkpmpgdwngagahtnvs   | 267 |
| <i>Aedes aegypti</i> ; AAV31915.1             | mpaqweyqvgpcegisigdelwvsrflhriaefgivatldpkpmpgdwngagahtnvs   | 262 |
| <i>Culex tarsalis</i> ; JAV34836.1            | mpaqweyqvgpcegismgddlwmsrflhriaefgivatldpkpmpgdwngagahtnvs   | 295 |
| <i>Culex quinquefasciatus</i> ; EDS39993.1    | mpaqweyqvgpcegismgddlwmsrflhriaefgivatldpkpmpgdwngagahtnvs   | 224 |
| <i>Culex pipiens pallens</i> ; XP_039453062.1 | mpaqweyqvgpcegismgddlwmsrflhriaefgivatldpkpmpgdwngagahtnvs   | 160 |

\*\*\*\*\*..\*\*\*\*\*..\*\* \*\*..\*\*\*..\*\*..\*..\*..\*\*\*\*\*.\*\*\*\*\* \*\*\*\* \*

|                                               |                                                               |     |
|-----------------------------------------------|---------------------------------------------------------------|-----|
| <i>Homo sapiens</i> ; NP_001028216.1          | tkamreenglkyieeiaeklskrhqyhiraydpkggldnarrltgfhetsnindsagva   | 317 |
| <i>Drosophila melanogaster</i> ; AHN59591.1   | tkamredggirdiekavaklskcherhiraydpkqgqdnarrltgkhetssindsagva   | 327 |
| <i>Aedes aegypti</i> ; AAV31915.1             | tktmreeggiveiesaiaklskcherhiraydpregkdnerrltgkhetssiydfnagva  | 322 |
| <i>Culex tarsalis</i> ; JAV34836.1            | tqamreegglaeiekaiaiklsqcherhiraydprggkdnerrltgkhetssihdfnagva | 355 |
| <i>Culex quinquefasciatus</i> ; EDS39993.1    | tqamreegglaeiekaiaiklstcherhiraydprggkdnerrltgkhetssihdfnagva | 284 |
| <i>Culex pipiens pallens</i> ; XP_039453062.1 | tqamrdegglaeiekaiaiklstcherhiraydprggkdnerrltgkhetssihdfnagva | 220 |

\*..\*..\*..\*.. \*\*..\*..\*\*\* \*..\*\*\*\*\*..\* \*\* \*\*\*\*\* \*\*\*\*\* \*..\*..\*\*\*\*\*



---

|                                                     |                                                           |     |
|-----------------------------------------------------|-----------------------------------------------------------|-----|
| <i>Homo sapiens</i> ; NP_001028216.1                | nrsasiriprtvgqekkgfyfedrrpsancdpfsvtealirtcllnetgdepfqykn | 373 |
| <i>Drosophila melanogaster</i> ; AHN59591.1         | nrgcsiriprgvnddgkgfyfedrrpssncdpysvveailrticlde-----      | 373 |
| <i>Aedes aegypti</i> ; AAV31915.1                   | nrgasvriprgvadegkgfyfedrrpssncdpysvveailrticlde-----      | 368 |
| <i>Culex tarsalis</i> ; JAV34836.1                  | nrgasvriprgvadegkgfyfedrrpssncdpvvcailrticlne-----        | 401 |
| <i>Culex quinquefasciatus</i> ; EDS39993.1          | nrgasvriprgvadegkgfyfedrrpssncdpvvcailrticlde-----        | 330 |
| <i>Culex pipiens pallens</i> ; XP_039453062.1       | nrgasvriprgvadegkgfyfedrrpssncdpvvcailrticlde-----        | 266 |
| ** *.***** * .. *****.******. * *.***** *.*<br>.. . |                                                           |     |

---

| <b>Percent Identity Matrix for glutamine synthetase</b> | <i>Homo sapiens</i> ; NP_001028216.1 | <i>Drosophila melanogaster</i> ; AHN59591.1 | <i>Aedes aegypti</i> ; AAV31915.1 | <i>Culex tarsalis</i> ; JAV34836.1 | <i>Culex quinquefasciatus</i> ; EDS39993.1 | <i>Culex pipiens pallens</i> ; XP_039453062.1 |
|---------------------------------------------------------|--------------------------------------|---------------------------------------------|-----------------------------------|------------------------------------|--------------------------------------------|-----------------------------------------------|
| <i>Homo sapiens</i> ; NP_001028216.1                    | 100.00                               | 65.29                                       | 65.01                             | 65.56                              | 66.15                                      | 69.55                                         |
| <i>Drosophila melanogaster</i> ; AHN59591.1             | 65.29                                | 100.00                                      | 81.79                             | 80.97                              | 80.00                                      | 83.08                                         |
| <i>Aedes aegypti</i> ; AAV31915.1                       | 65.01                                | 81.79                                       | 100.00                            | 87.77                              | 87.38                                      | 91.35                                         |
| <i>Culex tarsalis</i> ; JAV34836.1                      | 65.56                                | 80.97                                       | 87.77                             | 100.00                             | 94.15                                      | 98.50                                         |
| <i>Culex quinquefasciatus</i> ; EDS39993.1              | 66.15                                | 80.00                                       | 87.38                             | 94.15                              | 100.00                                     | 99.62                                         |
| <i>Culex pipiens pallens</i> ; XP_039453062.1           | 69.55                                | 83.08                                       | 91.35                             | 98.50                              | 99.62                                      | 100.00                                        |

---

S1.8. Multiple sequence alignment for tyrosine-hydroxylase (Gene ID: 25085)

|                                                |                                                              |     |
|------------------------------------------------|--------------------------------------------------------------|-----|
| <i>Rattus norvegicus</i> ; XP_038957248.1      | mptpsapsppk-----gfravseqdak-----qaeavtrricchpesprfigr        | 46  |
| <i>Drosophila melanogaster</i> ; CAA53802.1    | mmavaaaqknremfaikk-----ys--iengypsr                          | 29  |
| <i>Culex quinquefasciatus</i> ; XP_038115090.1 | -----meaklnlfsvlktifkmhte-----pqqviqillnce--eengypsr         | 40  |
| <i>Culex pipiens pallens</i> ; XP_039429428.1  | -----meaklnlfsvlktifkmhte-----pqqviqillnce--eengypsr         | 40  |
| <i>Aedes aegypti</i> ; EJY57397.1              | -----                                                        | 0   |
| <i>Anopheles darlingi</i> ; ETN61516.1         | mmavaaaqknremfaikk-sysieikrdnrcvlscvalsegdgvvlddec--tsngypsr | 57  |
| <i>Anopheles merus</i> ; XP_041769716.1        | mmavaaaqknremfaikk-sysie-----ngypsr                          | 29  |
| <i>Anopheles sinensis</i> ; AMZ03511.1         | mmavaaaqknremfaikk-sysie-----ngypsr                          | 29  |
|                                                |                                                              |     |
| <i>Rattus norvegicus</i> ; XP_038957248.1      | rqsliedarkereaaaa-----                                       | 63  |
| <i>Drosophila melanogaster</i> ; CAA53802.1    | rrslvddarfetivvkqtkqtvleearskan-----                         | 60  |
| <i>Culex quinquefasciatus</i> ; XP_038115090.1 | rrslvddarfetivvkqtkqtvldearvkandsdslevq-----qvpdqhp---       | 86  |
| <i>Culex pipiens pallens</i> ; XP_039429428.1  | rrslvddarfetivvkqtkqtvldearvkandsdslevq-----qvpdqhp---       | 86  |
| <i>Aedes aegypti</i> ; EJY57397.1              | -----medavp-----                                             | 6   |
| <i>Anopheles darlingi</i> ; ETN61516.1         | rrslvddarfetivvkqtkqtvldearakandssvestvlqaeq-qqedklsqeiqqtv  | 116 |
| <i>Anopheles merus</i> ; XP_041769716.1        | rrslvddarfetivvkqtkqtvldearakandsslectilqaeqhqqedkipqevqqtv  | 89  |
| <i>Anopheles sinensis</i> ; AMZ03511.1         | rrslvddarfetivvkqtkqtvldearakan-----edklpqevqqtv             | 72  |

|                                                |                                                               |     |
|------------------------------------------------|---------------------------------------------------------------|-----|
| <i>Rattus norvegicus</i> ; XP_038957248.1      | -----aaaaavassepgnpleavfee-----rdgn                           | 89  |
| <i>Drosophila melanogaster</i> ; CAA53802.1    | -----dygltedeillanaasessdaaea                                 | 84  |
| <i>Culex quinquefasciatus</i> ; XP_038115090.1 | -----qavddlpypdpeeiv-sngaqqddetdaglteeevvlqnaasespeaeke       | 133 |
| <i>Culex pipiens pallens</i> ; XP_039429428.1  | -----qavddlpypdpeeiv-sngaqqddetdaglteeevvlqnaasespeaeke       | 133 |
| <i>Aedes aegypti</i> ; EJY57397.1              | -e-----qqqlqadev---pqmeenqatsqdeiddaglteeevvlqnaasespeaekq    | 54  |
| <i>Anopheles darlingi</i> ; ETN61516.1         | edndydeeeirmaavdsllphkpkqhepsaddeekkdaglteeevvlqnaasespeaeke  | 176 |
| <i>Anopheles merus</i> ; XP_041769716.1        | edqnddeeeirmvavdelpqkpqehvpsaddedketdaglteeevvlqnaasespeaeke  | 149 |
| <i>Anopheles sinensis</i> ; AMZ03511.1         | edqnddeeeirmvavddlpqkpqeehvpsandedketdaglteeevvlqnaasespeaeke | 132 |
|                                                | : * : : :                                                     | :   |

```

.          ***.*.*.  .*.*.*.  ..
..         .  .  ..  ...  ..

```



|                                                   |                                                              |     |
|---------------------------------------------------|--------------------------------------------------------------|-----|
| <i>Rattus norvegicus</i> ; XP_038957248.1         | egfqllerycgyredsipqledvsrflkertgqlrpvagllsardflaslafrvfqctq  | 322 |
| <i>Drosophila melanogaster</i> ; CAA53802.1       | aafqklqdeqifvetrlpqlqemsdflrkntgflrpaaglltardflaslafrifqstq  | 320 |
| <i>Culex quinquefasciatus</i> ; XP_038115090.1    | avfhkleekifvngripqlqemsdflrkntgflrpaaglltardflaslafrifqstq   | 370 |
| <i>Culex pipiens pallens</i> ; XP_039429428.1     | avfhkleekifvngripqlqemsdflrkntgflrpaaglltardflaslafrifqstq   | 370 |
| <i>Aedes aegypti</i> ; EJJ57397.1                 | avfkledelikfvrkerlpqlqemsdflrkntgflrpaaglltardflaslafrifqstq | 290 |
| <i>Anopheles darlingi</i> ; ETN61516.1            | avfrkleekifvrkerlpqlqemsdflrkntgflrpaaglltardflaslafrifqstq  | 412 |
| <i>Anopheles merus</i> ; XP_041769716.1           | avfrkleelikfvrkerlpqlqemsdflrkntgflrpaaglltardflaslafrifqstq | 385 |
| <i>Anopheles sinensis</i> ; AMZ03511.1            | avfkleeekifvrnerlpqlqemsdflrntgflrpaaglltardflaslafrifqstq   | 368 |
| *. *.: .: .***...* **.. *** *** .....*****.*** ** |                                                              |     |
| <i>Rattus norvegicus</i> ; XP_038957248.1         | yirhasspmhspepdcchellghvpmldrtfaqsqdiglaslgasdeeieklstvywf   | 382 |
| <i>Drosophila melanogaster</i> ; CAA53802.1       | yvrhvnspyhtpepdcihellghmplladpsfaqsqeiglaslgasdeeieklstvywf  | 380 |
| <i>Culex quinquefasciatus</i> ; XP_038115090.1    | yvrhinspyhtpepdcihellghmplladpsfaqsqeiglaslgasdeeieklstvywf  | 430 |
| <i>Culex pipiens pallens</i> ; XP_039429428.1     | yvrhinspyhtpepdcihellghmplladpsfaqsqeiglaslgasdeeieklstvywf  | 430 |
| <i>Aedes aegypti</i> ; EJJ57397.1                 | yvrhinspyhtpepdcihellghmplladpsfaqsqeiglaslgasdeeieklstvywf  | 350 |
| <i>Anopheles darlingi</i> ; ETN61516.1            | yvrhinspyhtpepdcihellghmplladpsfaqsqeiglaslgasdeeieklstvywf  | 472 |
| <i>Anopheles merus</i> ; XP_041769716.1           | yvrhinspyhtpepdcihellghmplladpsfaqsqeiglaslgasdeeieklstvywf  | 445 |
| <i>Anopheles sinensis</i> ; AMZ03511.1            | yvrhinspyhtpepdcihellghmplladpsfaqsqeiglaslgasdeeieklstvywf  | 428 |
| *** ** *.***** .....*.*** .....*****.*****        |                                                              |     |

---

|                                                |                                                                |     |
|------------------------------------------------|----------------------------------------------------------------|-----|
| <i>Rattus norvegicus</i> ; XP_038957248.1      | tvefglckqngelkaygagllssygellhslseepevrafdpdaavqpyqddqyqpyf     | 442 |
| <i>Drosophila melanogaster</i> ; CAA53802.1    | tvefglckehgqikaygagllssygellhaisdkcehrafepastavqpyqddqeyqpiyy  | 440 |
| <i>Culex quinquefasciatus</i> ; XP_038115090.1 | tvefglckennevkaaygagllsaygellhaisdkpehrafepastavqpyqddqeyqpiyy | 490 |
| <i>Culex pipiens pallens</i> ; XP_039429428.1  | tvefglckennevkaaygagllsaygellhaisdkpehrafepastavqpyqddqeyqpiyy | 490 |
| <i>Aedes aegypti</i> ; EY57397.1               | tvefglckennevkaaygagllsaygellhaisdkpehrafepastavqpyqddqeyqpiyy | 410 |
| <i>Anopheles darlingi</i> ; ETN61516.1         | tvefglckekdevkaaygagllsaygellhaisdkpehrafepastavqpyqddqeyqpiyy | 532 |
| <i>Anopheles merus</i> ; XP_041769716.1        | tvefglckekdevkaaygagllsaygellhaisdkpehrpfepastavqpyqddqeyqpiyy | 505 |
| <i>Anopheles sinensis</i> ; AMZ03511.1         | tvefglckeknevkaaygagllsaygellhaisdkpehrpfepastavqpyqddqeyqpiyy | 488 |

\*\*\*\*\*..\*\*\*\*\*..\*\*\*\*\*..\* \* \*. \* ..\*\*\*\*\* \*..\*.  
.....

|                                                |                                                              |     |
|------------------------------------------------|--------------------------------------------------------------|-----|
| <i>Rattus norvegicus</i> ; XP_038957248.1      | vsesfndakdklrnyasriqrpsvkfdpytlaidvldsphtiqrslsgvqdelhtlaha  | 502 |
| <i>Drosophila melanogaster</i> ; CAA53802.1    | vaesfedakdkfrwvstmsrpfvfrfnphtervevldsvdkletlvhqmnteilhltna  | 500 |
| <i>Culex quinquefasciatus</i> ; XP_038115090.1 | vaesfedakekfrwvstmsrpfvfrfnphtervevldsvdkldtlvsqInteilhltna  | 550 |
| <i>Culex pipiens pallens</i> ; XP_039429428.1  | vaesfedakekfrwvstmsrpfvfrfnphtervevldsvdkldtlvsqInteilhltna  | 550 |
| <i>Aedes aegypti</i> ; EY57397.1               | vaesfedakekfrwvstmsrpfvfrfnphtervevldsvdkldtlvsqInteilhltna  | 470 |
| <i>Anopheles darlingi</i> ; ETN61516.1         | vaesfedakekfrwvstmsrpfvfrfnphtervevldsvdkletlvsqIntemilhltna | 592 |
| <i>Anopheles merus</i> ; XP_041769716.1        | vaesfedakekfrwvstmsrpfvfrfnphtervevldsvdkletlvsqIntevlhltna  | 565 |
| <i>Anopheles sinensis</i> ; AMZ03511.1         | vaesfedakekfrwvstmsrpfvfrfnphtervevldsvdkldtlvsqIntellhltna  | 548 |

\*..\*..\*..\*..\* \* \* \*..\*..\*..\*..\*..\*..\*..\*  
\*..\*..\*..\*..\* \* \* \*..\*..\*..\*..\*..\*..\*..\*

---

|                                                |           |     |
|------------------------------------------------|-----------|-----|
| <i>Rattus norvegicus</i> ; XP_038957248.1      | lsais---- | 507 |
| <i>Drosophila melanogaster</i> ; CAA53802.1    | isklrrpf- | 508 |
| <i>Culex quinquefasciatus</i> ; XP_038115090.1 | iaklrqpf- | 559 |
| <i>Culex pipiens pallens</i> ; XP_039429428.1  | iaklrqpf- | 559 |
| <i>Aedes aegypti</i> ; EJJ57397.1              | iaklrqpf- | 479 |
| <i>Anopheles darlingi</i> ; ETN61516.1         | iaklrqpf- | 601 |
| <i>Anopheles merus</i> ; XP_041769716.1        | iaklkqpf- | 574 |
| <i>Anopheles sinensis</i> ; AMZ03511.1         | iekqrqpf- | 557 |
|                                                | :         | :   |



| <b>Percent Identity Matrix for tyrosine-hydroxylase</b> | <i>Rattus norvegicus</i> ; XP_038957248.1 | <i>Drosophila melanogaster</i> ; CAA53802.1 | <i>Culex quinquefasciatus</i> ; XP_038115090.1 | <i>Culex pipiens pallens</i> ; XP_039429428.1 | <i>Aedes aegypti</i> ; EJJ57397.1 | <i>Anopheles darlingi</i> ; ETN61516.1 | <i>Anopheles merus</i> ; XP_041769716.1 | <i>Anopheles sinensis</i> ; AMZ03511.1 |
|---------------------------------------------------------|-------------------------------------------|---------------------------------------------|------------------------------------------------|-----------------------------------------------|-----------------------------------|----------------------------------------|-----------------------------------------|----------------------------------------|
| <i>Rattus norvegicus</i> ; XP_038957248.1               | 100.00                                    | 49.57                                       | 48.68                                          | 48.68                                         | 51.59                             | 47.70                                  | 48.54                                   | 48.75                                  |
| <i>Drosophila melanogaster</i> ; CAA53802.1             | 49.57                                     | 100.00                                      | 80.88                                          | 80.88                                         | 82.37                             | 82.84                                  | 83.50                                   | 83.10                                  |
| <i>Culex quinquefasciatus</i> ; XP_038115090.1          | 48.68                                     | 80.88                                       | 100.00                                         | 100.00                                        | 91.95                             | 84.56                                  | 87.06                                   | 89.31                                  |
| <i>Culex pipiens pallens</i> ; XP_039429428.1           | 48.68                                     | 80.88                                       | 100.00                                         | 100.00                                        | 91.95                             | 84.56                                  | 87.06                                   | 89.31                                  |
| <i>Aedes aegypti</i> ; EJJ57397.1                       | 51.59                                     | 82.37                                       | 91.95                                          | 91.95                                         | 100.00                            | 90.19                                  | 90.40                                   | 91.21                                  |
| <i>Anopheles darlingi</i> ; ETN61516.1                  | 47.70                                     | 82.84                                       | 84.56                                          | 84.56                                         | 90.19                             | 100.00                                 | 95.64                                   | 94.79                                  |
| <i>Anopheles merus</i> ; XP_041769716.1                 | 48.54                                     | 83.50                                       | 87.06                                          | 87.06                                         | 90.40                             | 95.64                                  | 100.00                                  | 95.69                                  |
| <i>Anopheles sinensis</i> ; AMZ03511.1                  | 48.75                                     | 83.10                                       | 89.31                                          | 89.31                                         | 91.21                             | 94.79                                  | 95.69                                   | 100.00                                 |
